# Supplementary material for: Stabilizing 4π electron pyrrolyl cations by inducing aromaticity
Source: Royal Society of Chemistry journal article supplement (doi:10.1039/d4cc04560b), 2024-11-26
Supplement: d4cc04560b1.pdf [file d4cc04560b1.pdf]

## Supplementary Materials for

### **Stabilizing $4\pi$ Electron Pyrrolyl Cation by inducing aromaticity**

**The PDF file includes:**

Materials and Methods  
Supplementary Text  
NMR spectra  
Figs. S1 to S35  
Schemes S1 to S9  
Tables S1 to S10  
References

**Other Supplementary Materials for this manuscript include the following:**

XYZ Coordinates

## Table of Contents

| <b>S. No.</b> | <b>Contents</b>                                                                                         | <b>Page Number</b> |
|---------------|---------------------------------------------------------------------------------------------------------|--------------------|
| 1.            | General Considerations                                                                                  | S3                 |
| 2.            | Extended figures and tables                                                                             | S4-S13             |
| 3.            | Experimental Section                                                                                    | S14-S17            |
| 4.            | Spectroscopic data of synthesized compounds                                                             | S18-S32            |
| 5.            | Crystallographic details and Single crystal X-ray diffraction data of Compound <b>4a</b> .              | S33-S42            |
| 6.            | Computational details and EDA-NOCV                                                                      | S43-S45            |
| 7.            | List of cartesian coordinates of all the optimized geometries at <b>M062x/def2tzvpp</b> level of theory | S46-S81            |
| 8.            | Additional references                                                                                   | S82-83             |

## General considerations

All the reagents were obtained from commercial sources and were used as such without any purification. Organic solvents used for reaction were purified and dried over appropriate drying agents according to the standard methods prior to use. The reactions were monitored by thin layer chromatography (TLC) using 0.2 mm Merck pre-coated silica gel 60 F254 aluminium sheets. The intermediate products were purified by column chromatography using 100-200 mesh size silica gel as stationary bed and ethyl acetate/*n*-hexane as mobile phase. Melting points (MPs) were measured using a Cole-Parmer MP-400 melting point apparatus. Proton nuclear magnetic resonance ( $^1\text{H}$  NMR) and carbon NMR ( $^{13}\text{C}$  NMR) spectra were recorded on JEOL ECA 600 MHz spectrometer.  $^1\text{H}$  chemical shifts ( $\delta$ ) are given in ppm and coupling constant ( $J$ ) values are given in hertz. The chemical shifts are referenced to NMR residual solvents ( $\text{CDCl}_3$ ,  $^1\text{H}$   $\delta$  = 7.25,  $^{13}\text{C}$   $\delta$  = 77.0;  $\text{DMSO-}d_6$ ,  $^1\text{H}$   $\delta$  = 2.50,  $^{13}\text{C}$   $\delta$  = 39.53; and  $\text{CD}_3\text{OD}$   $^1\text{H}$   $\delta$  = 3.31,  $^{13}\text{C}$   $\delta$  = 49.03. Splitting pattern were abbreviated as s = singlet, d = doublet, t = triplet, q = quartet, dd = doublet of doublet, dt = doublet of triplet, hept = heptet and m = multiplet.  $^{13}\text{C}$  NMR was recorded at 151 MHz after fully decoupled broad band decoupling. UV-Vis data was collected using Shimadzu UV-2450 instrument. Emission spectra was collected using Cary Eclipse Fluorescence Spectrophotometer.

**Table S1.** The experimental and quantum chemically estimated values of  $^1\text{H}$  NMR of compounds **3a-3d** using M06-2x/def2tzvpp level of theory.

| Compound  | Experimental             |                                 | Theoretical              |                                 |
|-----------|--------------------------|---------------------------------|--------------------------|---------------------------------|
|           | NH proton $\delta$ (ppm) | Pyrrole aromatic $\delta$ (ppm) | NH proton $\delta$ (ppm) | Pyrrole aromatic $\delta$ (ppm) |
| <b>3a</b> | 10.74                    | 5.41                            | 10.67                    | 5.29                            |
| <b>3b</b> | 11.77                    | 6.97                            | 10.67                    | 7.17                            |
| <b>3c</b> | 10.8                     | 6.41                            | 10.47                    | 6.93                            |
| <b>3d</b> | 10.52                    | 6.89                            | 10.35                    | 7.02                            |

**Table S2.** The experimental and quantum chemically estimated values of  $^1\text{H}$  NMR of compounds **4a-4d** using M06-2x/def2tzvpp level of theory.

| Compound  | $^1\text{H}$ NMR Pyrrolyl cation $\text{H}_4$ (in ppm) |             |
|-----------|--------------------------------------------------------|-------------|
|           | Experimental                                           | Theoretical |
| <b>4a</b> | 5.79                                                   | 5.61        |
| <b>4b</b> | 7.39                                                   | 7.43        |
| <b>4c</b> | 7.13                                                   | 7.33        |
| <b>4d</b> | 7.56                                                   | 7.59        |

The computational results obtained from the calculation have been scaled by 0.91. Although the scaling factor for this basis set (M06-2x/def2tzvpp) was not found in literature, the scaling factor 0.91 was chosen by comparing with nearest match.<sup>1</sup>

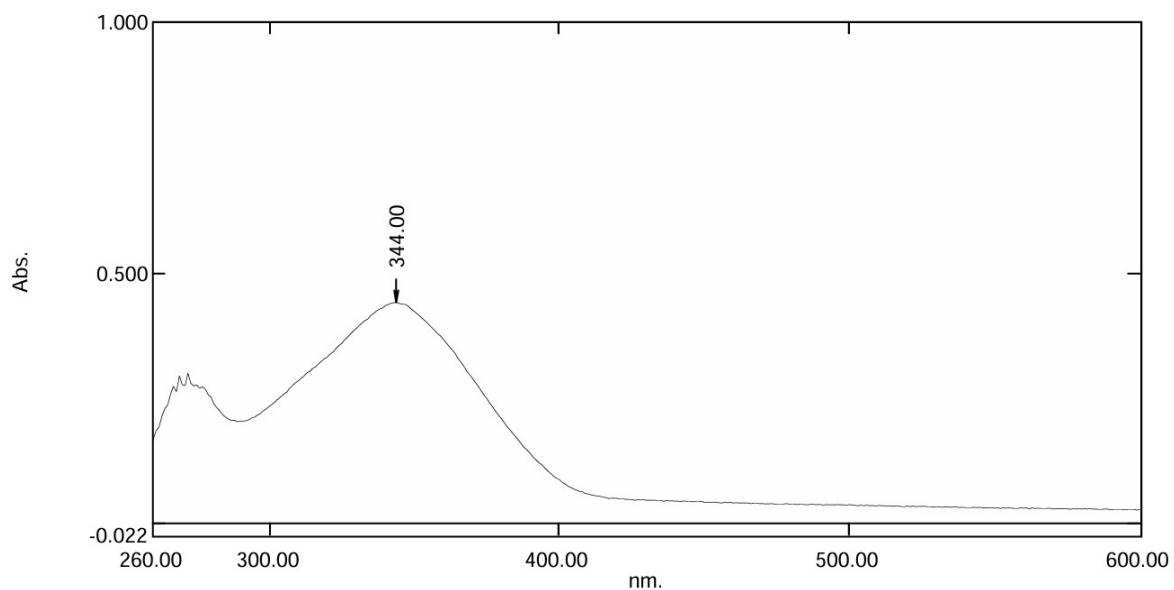

**Figure S1:** Experimental UV-Vis analysis of **4a**. Experimental UV-Vis was obtained from a  $10^{-4}$  M solution of **4a** in dry acetonitrile. A broad peak at 344 nm was observed.

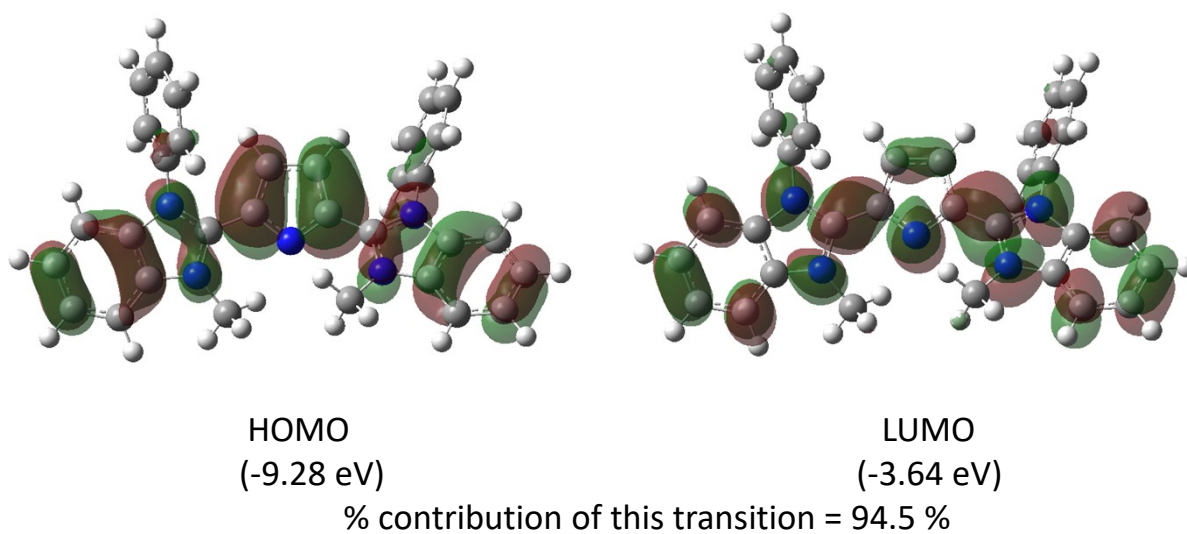

**Figure S2.** Electronic transitions corresponding to the calculated bands, along with their percentage contributions to the absorption.

**Table S3.** TD-DFT computed UV-Vis spectrum for compound **4a**.

| Compound  | Experimental $\lambda_{\text{max}}$ (nm) | Calculated $\lambda_{\text{max}}$ (nm) | Oscillator Strength (f) |
|-----------|------------------------------------------|----------------------------------------|-------------------------|
| <b>4a</b> | 344                                      | 347                                    | 1.4557                  |

NIPER, MOHALI  
FLUORESCENCE SPECTROPHOTOMETER

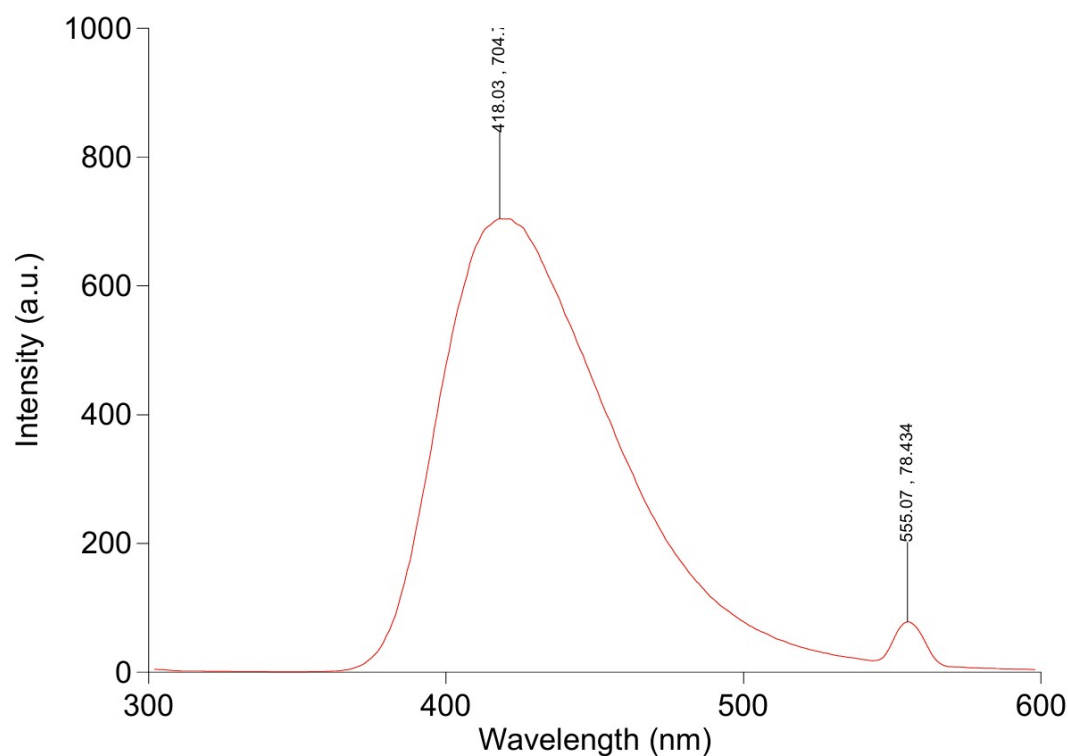

**Figure S3:** Experimental Emission spectrum of **4a**. Experimental Fluorescence spectrum was obtained from a  $10^{-4}$  M solution of **4a** in dry acetonitrile. A broad peak at 418 nm was observed.

**Table S4.** TD-DFT computed Emission spectrum for compound **4a**.

| S. No.    | Experimental    |                           |             | opt def2tzvpp m062x n=6 |             |      |
|-----------|-----------------|---------------------------|-------------|-------------------------|-------------|------|
|           | Wavelength (nm) | Emission Intensity (a.u.) | Energy (eV) | Wavelength (nm)         | Energy (eV) | f    |
| <b>4a</b> | 418.03          | 704.73                    | 2.97        | 428.32                  | 2.89        | 1.84 |

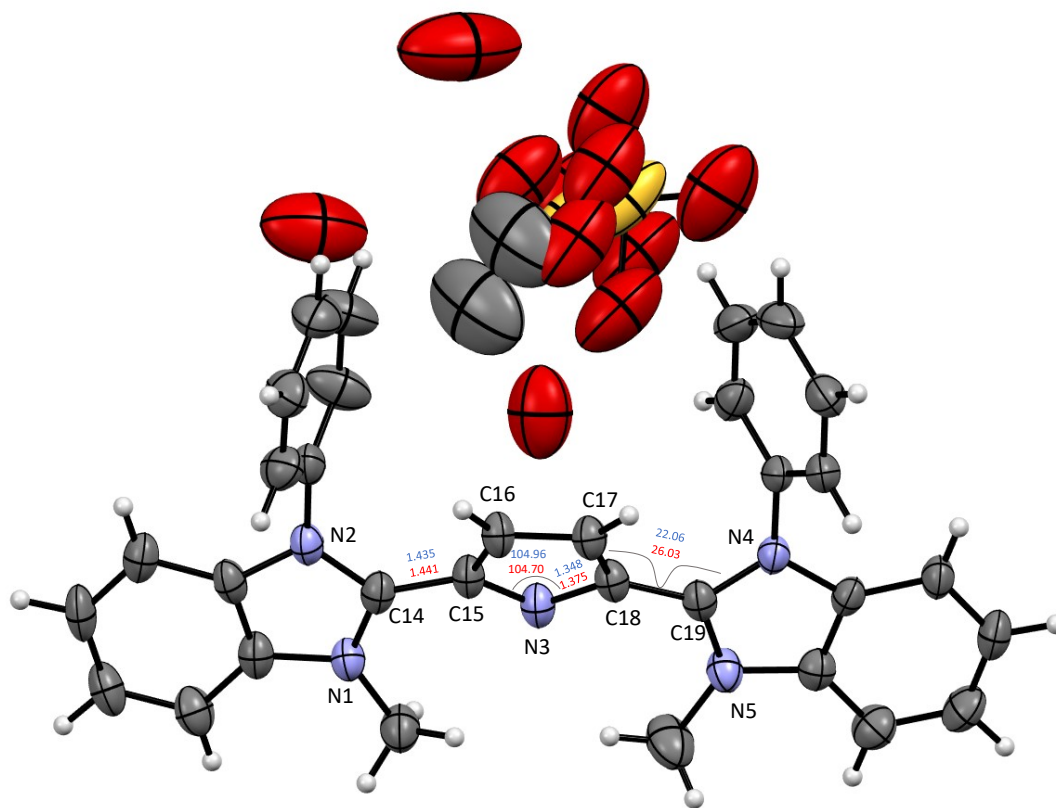

**Figure S4.** Comparison of the geometrical parameters of **4a** obtained using X-ray diffraction (red colour) and M06-2X/def2tzvpp (blue colour). Thermal ellipsoids are drawn at the 50% probability level.

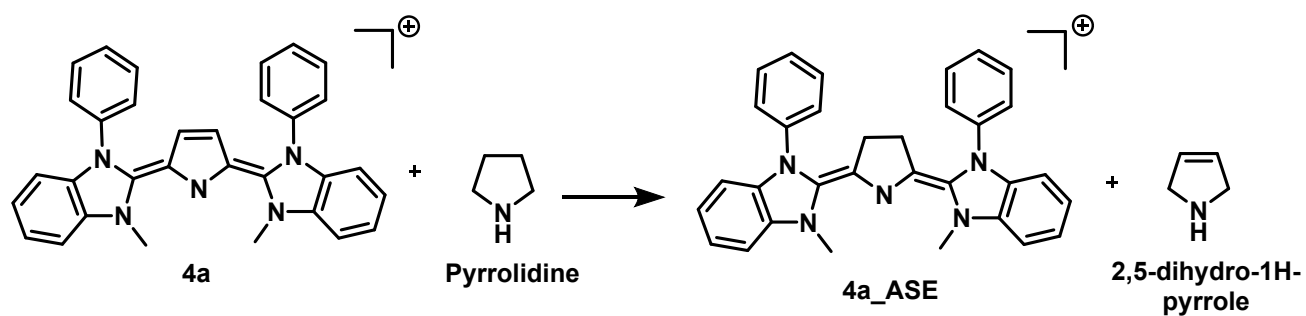

**Figure S5.** Equation employed to estimate the aromatic stabilization energy (ASE) of **4a**. Similar equations were used for **4b-4f**, and **5**.

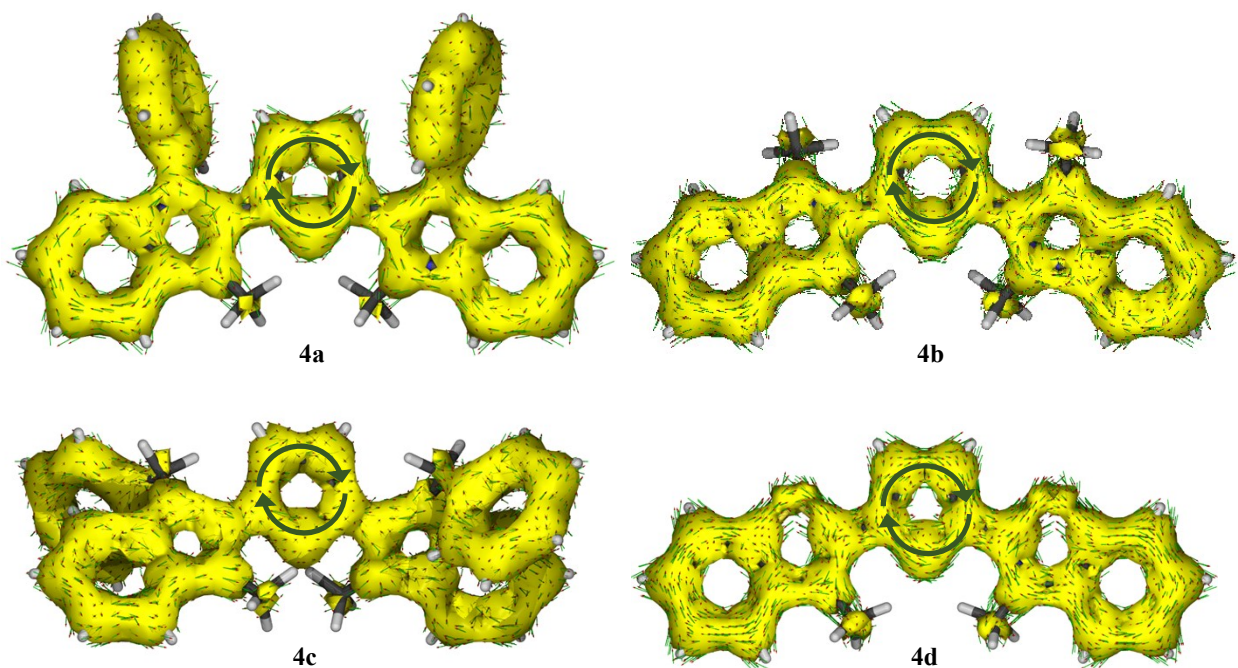

**Figure S6.** Contour diagrams generated for compounds (**4a-4d**) using ACID analysis. Clockwise direction of arrows indicates aromatic character in the ring.

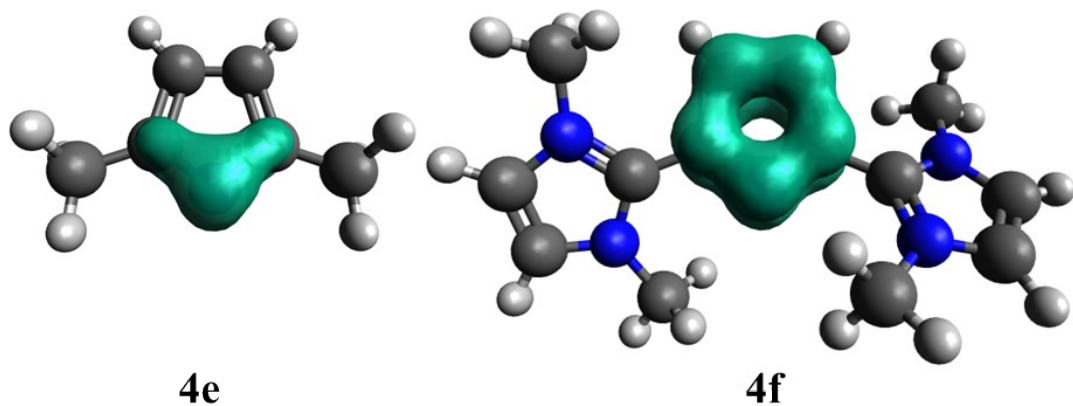

**Figure S7.** The EDDB contour maps (with an isosurface value of 0.015 a.u.) of **4e** and **4f**. The total number of delocalized electrons in the central ring particularly could be estimated using  $EDDB_p$ , which is 0.858 for **4e** indicating negligible delocalization and 3.904 (Table 1 in main manuscript) for the central ring of **4f** showing significant delocalization in the central pyrrolyl cation ring.



**Compound 4e**  
Antiaromatic ( $4\pi$  e)

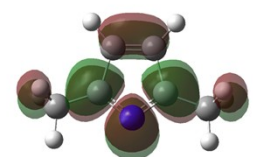

-3.12

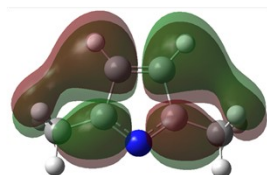

-3.39

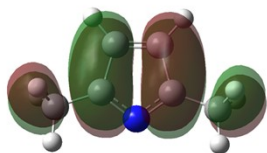

-8.64

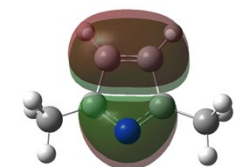

-14.46

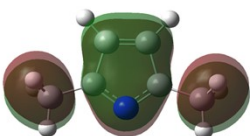

-16.81

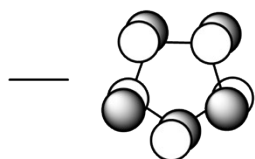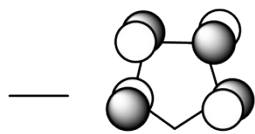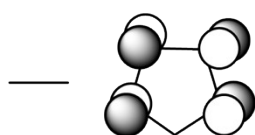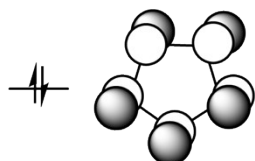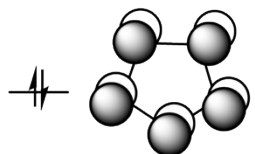

**Compound 4f**  
Aromatic ( $6\pi$  e)

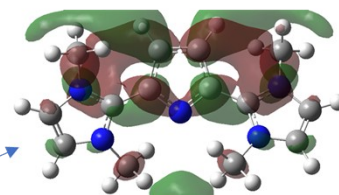

-0.07

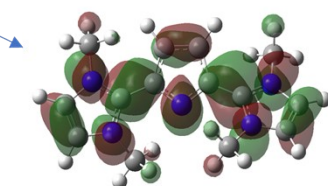

-3.18

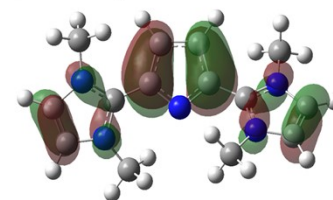

-9.59

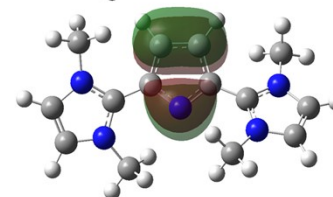

-10.64

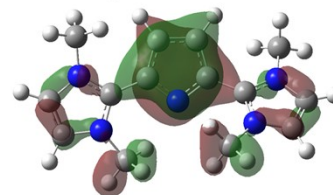

-15.45

**Figure S8.** Frontier Molecular  $\pi$  Orbitals of **4e** and **4f**. The molecular orbital energies are in eV.

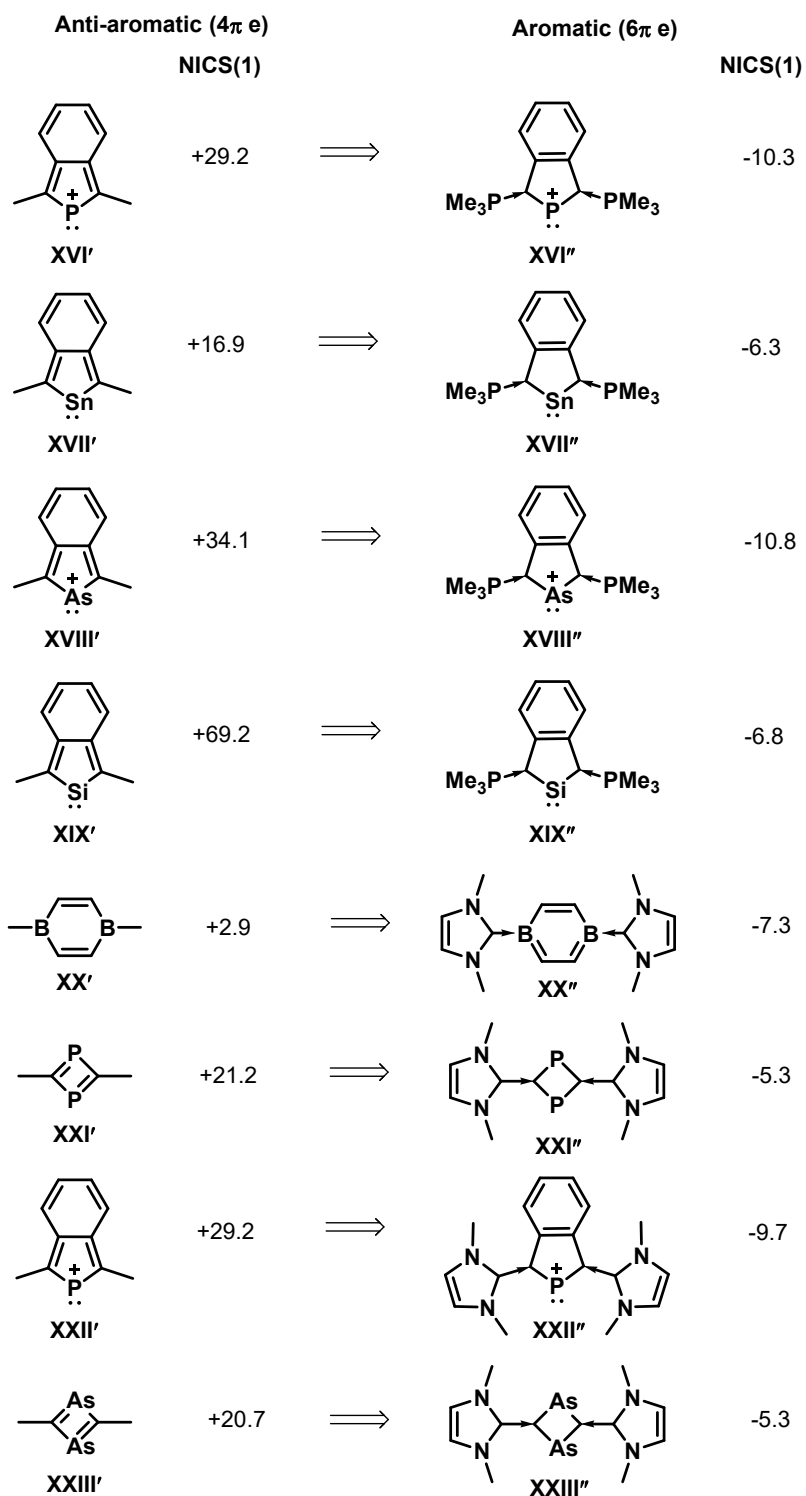

**Figure S9.** Schematic diagram showing anti-aromatic rings (**XVI'**- **XXIII'**) gain aromatic character upon replacing Me group with NHC ligand (**XVI''**- **XXIII''**) respectively, along with the comparison of NICS values. The complete optimization of **XVII'** gave non planar tricyclic ring with additional C-C bond.

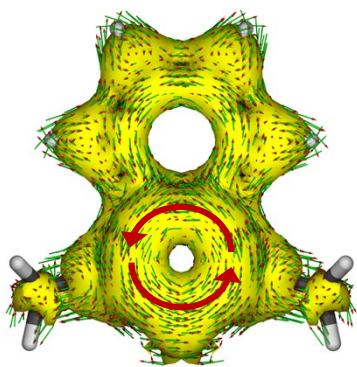

XVI'

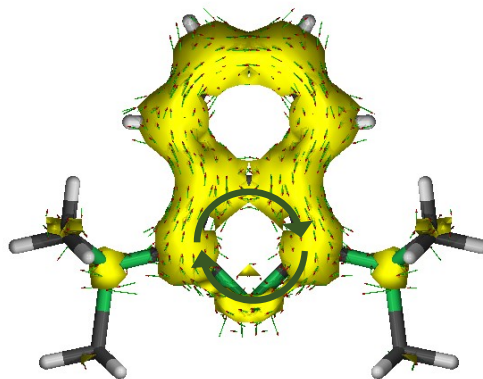

XVI''

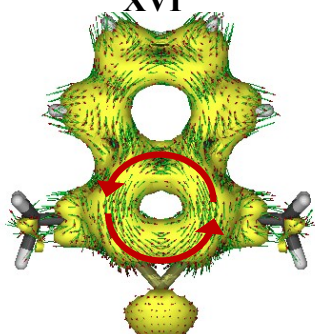

XVII'

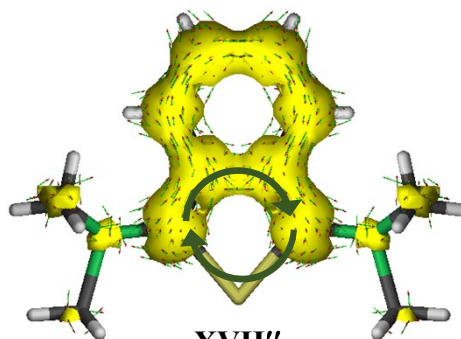

XVII''

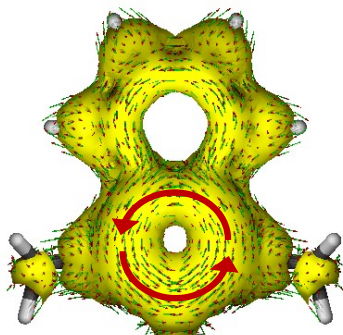

XVIII'

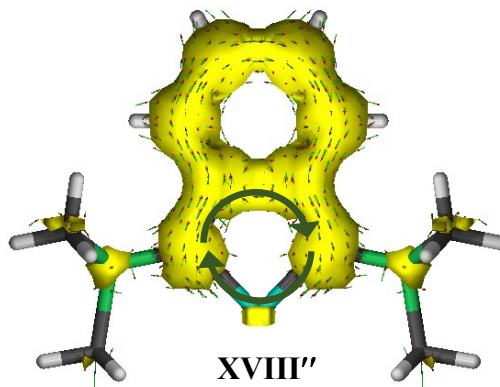

XVIII''

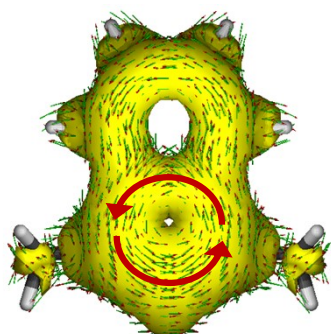

XIX'

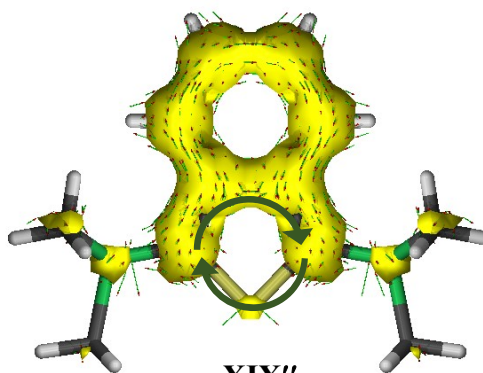

XIX''

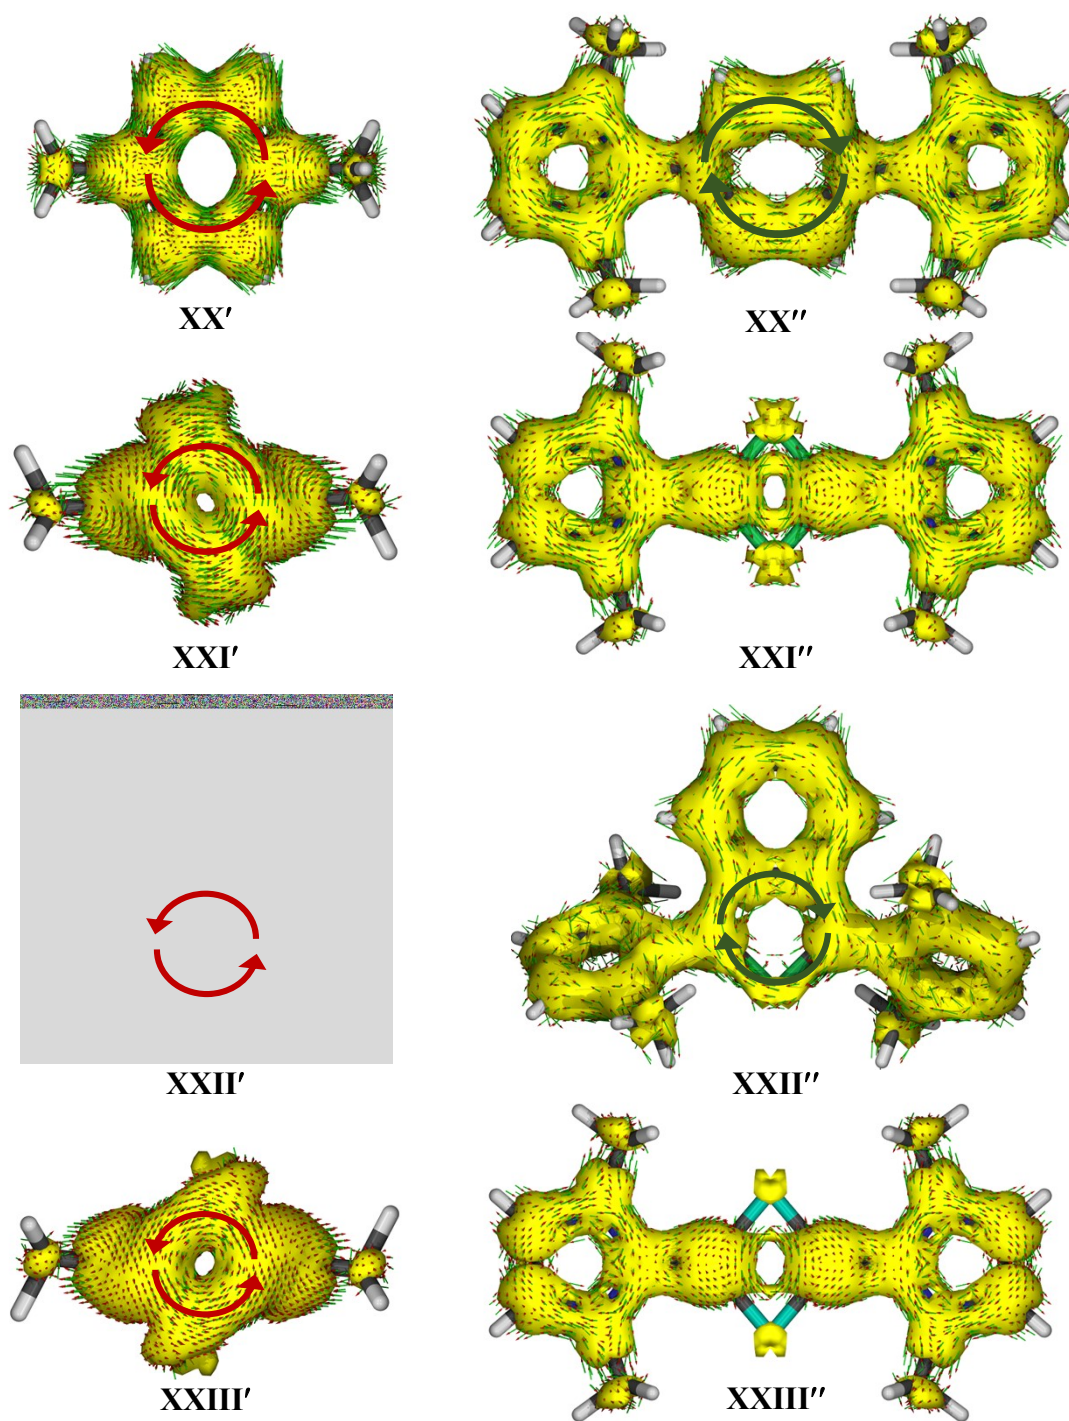

**Figure S10.** Contour diagrams generated for compounds (XVI'- XXIII' and XVI''- XXIII'') using ACID analysis. Clockwise direction of arrows indicates aromatic character in the ring while anticlockwise depicts anti-aromatic character.

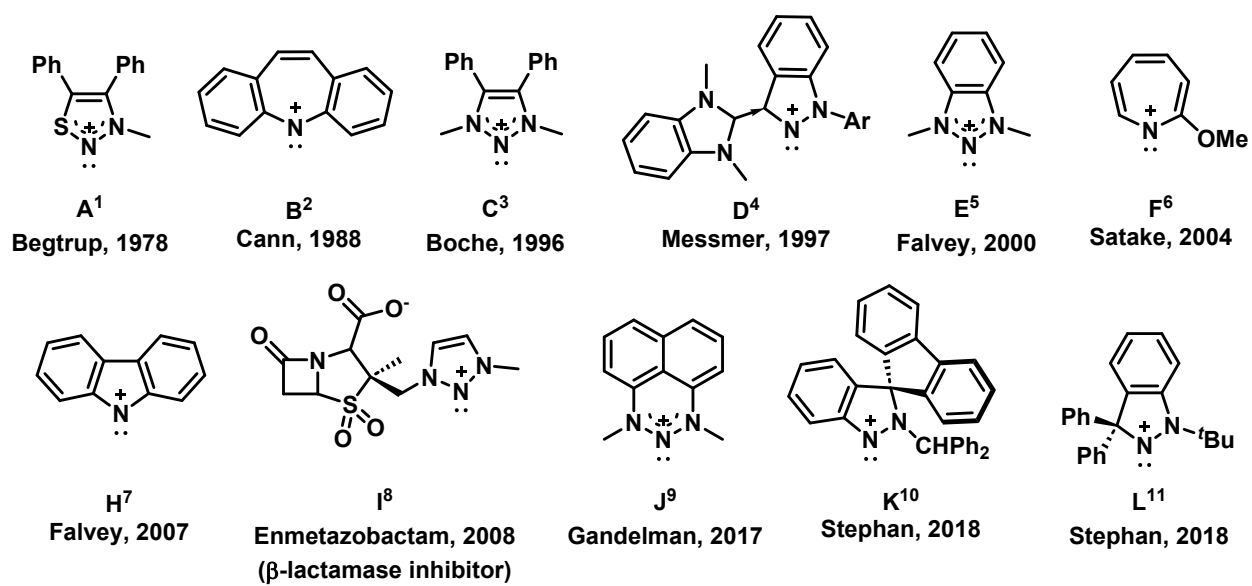

**Figure S11.** Experimentally known Cyclic Nitrenium ions (A-L).<sup>2-12</sup>

## EXPERIMENTAL SECTION

### Scheme S1. Preparation of Compound 1.<sup>13</sup>

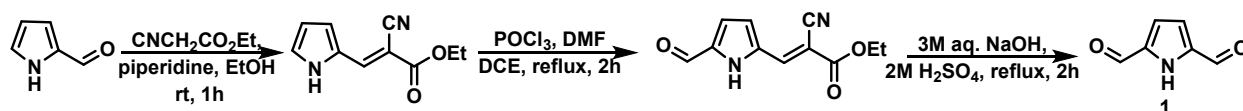

To a solution of pyrrole-2-carboxaldehyde (2.5 g, 26 mmol) and ethyl cyanoacetate (3.5 g, 32 mmol) in 50 ml of ethanol, the catalytic amount of piperidine was added. The reaction was stirred for 1 hour at room temperature. After the given time, the precipitates were formed. These precipitates were filtrated and washed by petroleum ether to afford 4.0 g  $\alpha$ -cyano-2-pyrroleacrylate (80 % yield). Further, in another reaction vessel, phosphoryl oxychloride (3.5 g, 23 mmol) in dichloroethane was added dropwise to a cooled solution of *N,N*-dimethylformamide (1.7 g, 23 mmol). The temperature during the addition was maintained at 0 C. The contents of the flask were warmed to rt and stirred for 15 mins.  $\alpha$ -cyano-2-pyrroleacrylate (4.0 g, 21 mmol) in dichloroethane was added in a dropwise manner to the flask at 0 C. The ice bath was removed and the reaction mixture was allowed to reflux for 30 mins. The solution was cooled to rt and sodium acetate (8.7 g, 105 mmol) was added. The mixture was refluxed again for 20 mins and allowed to cool to rt. The precipitate formed was filtered to afford Ethyl  $\alpha$ -cyano-5-formyl-2-pyrroleacrylate as 3.5 g greenish-brown powder (76 % yield). The alkaline hydrolysis of Ethyl  $\alpha$ -cyano-5-formyl-2-pyrroleacrylate was carried out. Ethyl  $\alpha$ -cyano-5-formyl-2-pyrroleacrylate (3.5 g, 16 mmol) was added to a 3M aqueous solution of NaOH (45 mL) and was allowed to reflux for 2 h. The mixture was then cooled to 20 °C and acidified with a 2M solution of H<sub>2</sub>SO<sub>4</sub>. The reaction mixture was extracted with ethyl acetate-water workup. Column chromatography was employed to get 1.6 g of pyrrole-2,5-dicarboxaldehyde in pure form for further reactions.

### Scheme S2. Preparation of Compound 2c.<sup>14</sup>

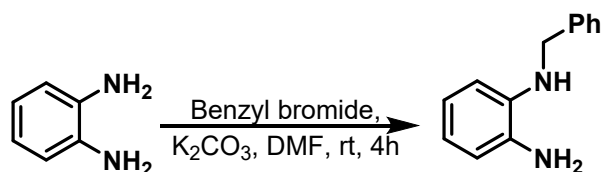

$K_2CO_3$  (2.5 g, 18 mmol) and benzyl bromide (1.1 g, 6 mmol) was added to a solution of *o*-phenylenediamine (1 g, 9.3 mmol) in DMF (30 mL). The mixture was allowed to stir at room temperature for 5 h and then diluted with EtOAc (50 mL). The inorganic impurities were washed off by ethyl acetate-water workup. The organic layer was collected and dried over sodium sulfate and concentrated by using a rotary evaporator. The residual oil was purified by silica gel column chromatography using the solvent system: (ethyl acetate: hexane in 1:9 ratio).

**Scheme S3: Preparation of Compound 3a-d.<sup>15</sup>**

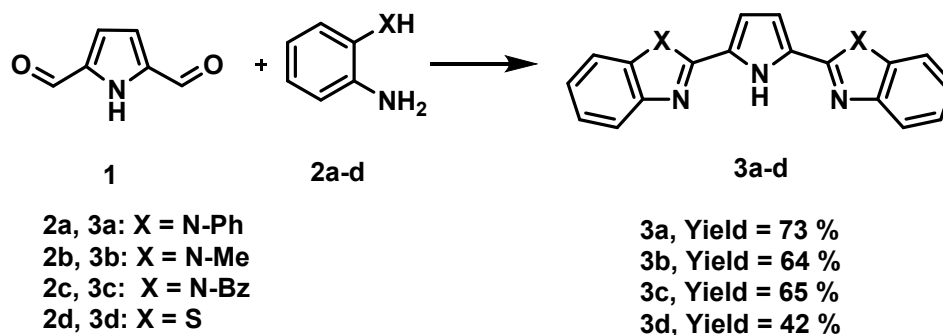

A solution of compound **2a** (122 mg, 1 mmol), **1** (123 mg, 0.5 mmol), iodine (23 mg, 0.15 mmol), UHP (24 mg, 0.25 mmol) in acetonitrile (5 mL) was stirred at 70 °C for 4-5 hours. After completion of the reaction as indicated by TLC, the reaction mixture was cooled to rt. The inorganic impurities were washed off by ethyl acetate-water workup. The crude mass was purified by silica gel column chromatography using ethyl acetate: hexane (2:8) to afford the title compound **3a**. Compounds **3b-d** were synthesized using similar procedure.

**Scheme S4: Preparation of Compound 4a (salt).** For the crystal structure of 4a, see Figure S4.

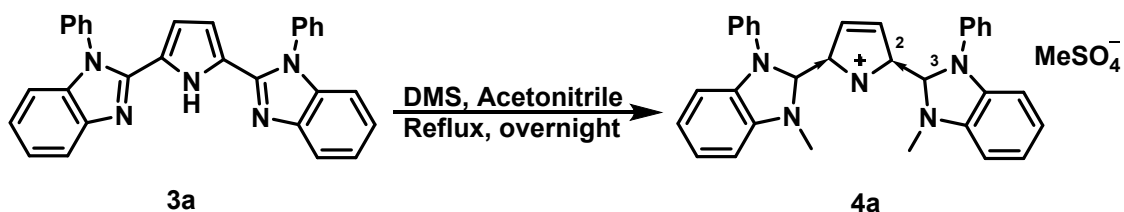

Compound **3a** (45 mg, 0.1 mmol) and dimethyl sulphate (100 mg, 0.8 mmol) were mixed together in 5-6 ml of acetonitrile solvent in a 10 ml round bottom flask. The reaction mixture was allowed to reflux (90-95 °C) for 12-14 hours. The reaction was monitored by using TLC. After cooling the reaction mixture to rt, the remaining solvent was removed under reduced pressure

and neutralized with  $\text{Na}_2\text{CO}_3$  solution. The aqueous phase was extracted with dichloromethane. The title compound **4a** was obtained from the organic layer by preparative TLC taking MeOH:EtOAc as a solvent in the ratio of 1:9, v/v. The pure title compound was obtained in 44 % isolated yield. It is pertinent to add that it is possible to isolate the dicationic species before treating it with base.

#### Scheme S5: Preparation of Compound 4b

Compound **3b** (33 mg, 0.1 mmol) and methyl triflate (49 mg, 0.3 mmol) were mixed together in 4 ml of dichloromethane solvent in a 10 ml round bottom flask. The reaction mixture was allowed to stir at 0 °C for 2-3 hours. The reaction was monitored by TLC. After thawing the reaction mixture to rt, the remaining solvent was removed under reduced pressure. The reaction mixture was neutralized with triethylamine. The title compound **4b** was obtained from the organic layer by preparative TLC. The pure title compound was obtained in 64 % isolated yield.

#### Scheme S6: Preparation of Compound 4c

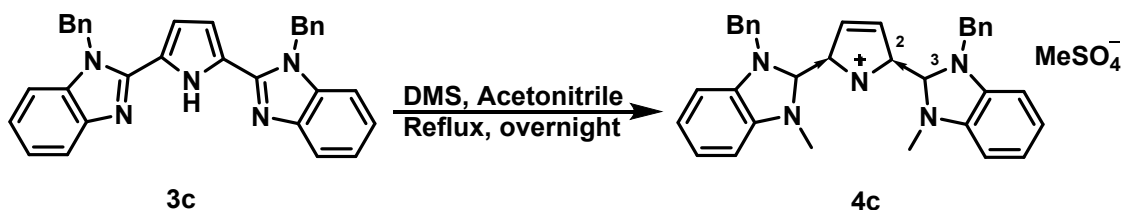

Compound **3c** (20 mg, 0.04 mmol) and dimethyl sulphate (41 mg, 0.32 mmol) were mixed together in 5 ml of acetonitrile in a 5 ml round bottom flask. The reaction mixture was allowed to reflux for 12-14 hours. The reaction was monitored by TLC. After cooling the reaction mixture to rt, the remaining solvent was removed under reduced pressure and neutralized with  $\text{Na}_2\text{CO}_3$  solution. The aqueous phase was extracted with dichloromethane. The title compound **4c** was purified by preparative TLC taking MeOH: EtOAc as a solvent in the ratio of 1:9 v/v. The pure title compound was obtained in 25 % isolated yield.

#### Scheme S7: Preparation of Compound 4d



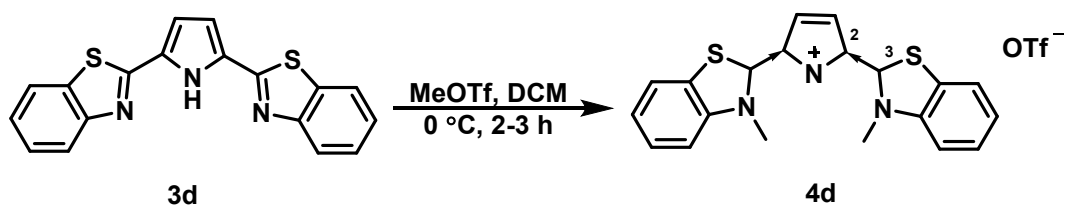

Compound **3d** (10 mg, 0.03 mmol) and methyl triflate (15 mg, 0.09 mmol) were mixed together in 5 ml dichloromethane solvent in a 10 ml round bottom flask. The reaction mixture was allowed to stir at 0 °C for 2-3 hours. The reaction was monitored by using TLC. After thawing the reaction mixture to rt, the remaining solvent was removed under reduced pressure. The title compound **4d** was purified by washing with dichloromethane and diethyl ether subsequently to afford the final product. The pure title compound was obtained in 23% isolated yield.

## Spectral Data:

**Compound 1:** Pinkish-brown solid; 46 % overall yield;  $^1\text{H}$  NMR (Chloroform-*d*):  $\delta$  = 10.45 (br s, 1H), 9.77 (s, 2H), 7.01 (s, 2H).

**Compound 2c:** Dark brown viscous liquid; 67 % overall yield.  $^1\text{H}$  NMR (Chloroform-*d*):  $\delta$  = 7.35 (m, 5H), 6.76 (m, 4H), 4.32 (s, 2H), 3.43 (s, 3H).

**Compound 3a:** Yellow solid; overall yield 325 mg, 73 %; M.P.: 234-236 °C;  $^1\text{H}$  NMR (600 MHz, Chloroform-*d*)  $\delta$ : 10.74 (s, 1H), 7.81 (d,  $J$  = 8.0 Hz, 2H), 7.56 (dd,  $J$  = 5.1, 2.1 Hz, 6H), 7.41 (dd,  $J$  = 7.4, 2.2 Hz, 4H), 7.31 (t,  $J$  = 7.0 Hz, 2H), 7.21 (t,  $J$  = 7.0 Hz, 2H), 7.03 (d,  $J$  = 8.0 Hz, 2H), 5.41 (s, 2H);  $^{13}\text{C}$  NMR (151 MHz, Chloroform-*d*)  $\delta$ : 145.61, 143.05, 137.74, 136.53, 130.16, 129.64, 128.37, 124.18, 123.09, 123.02, 119.22, 111.38, 110.03, 77.36, 77.15, 76.93, 0.12; HRMS-ESI  $m/z$  calcd for  $\text{C}_{30}\text{H}_{22}\text{N}_5^+$  [ $\text{M}+\text{H}^+$ ] 452.1870, found 452.1877.

**Compound 3b:** Pale white solid; overall yield 208 mg, 64 %; M.P.: 296-298 °C;  $^1\text{H}$  NMR (600 MHz, DMSO-*d*<sub>6</sub>)  $\delta$ : 11.77 (s, 1H), 7.61 (dd,  $J$  = 21.2, 7.8 Hz, 4H), 7.27 – 7.18 (m, 4H), 6.97 (s, 2H), 3.98 (s, 6H);  $^{13}\text{C}$  NMR (151 MHz, DMSO-*d*<sub>6</sub>)  $\delta$ : 146.69, 142.90, 136.87, 124.66, 122.70, 122.55, 119.06, 112.77, 110.77, 40.46, 40.32, 40.18, 40.04, 39.91, 39.77, 39.63, 31.91; LCMS-ESI  $m/z$  calcd for  $\text{C}_{20}\text{H}_{18}\text{N}_5^+$  [ $\text{M}+\text{H}^+$ ] 327.15, found 327.90.

**Compound 3c:** Light brown solid; overall yield 310 mg, 65 %; M.P.: 246-249 °C;  $^1\text{H}$  NMR (500 MHz, Chloroform-*d*)  $\delta$ : 7.82 (dd,  $J$  = 8.0, 1.0 Hz, 2H), 7.35 – 7.26 (m, 8H), 7.24 (d,  $J$  = 5.7 Hz, 4H), 7.10 (d,  $J$  = 6.5 Hz, 4H), 6.41 (s, 2H), 5.58 (s, 4H);  $^{13}\text{C}$  NMR (126 MHz, Chloroform-*d*)  $\delta$ : 146.14, 142.91, 136.33, 135.97, 129.26, 127.93, 125.92, 124.06, 123.13, 123.06, 119.53, 111.45, 109.75, 77.38, 77.13, 76.87, 48.10; HRMS-ESI  $m/z$  calcd for  $\text{C}_{32}\text{H}_{26}\text{N}_5^+$  [ $\text{M}+\text{H}^+$ ] 480.2183, found 480.2196.

**Compound 3d:** Yellow solid; overall yield 140 mg, 42 %; M.P.: 205-207 °C;  $^1\text{H}$  NMR (600 MHz, Chloroform-*d*)  $\delta$  10.52 (s, 1H), 7.98 (d,  $J$  = 8.1 Hz, 2H), 7.86 (d,  $J$  = 8.0 Hz, 2H), 7.48 (t,  $J$  = 7.0 Hz, 2H), 7.35 (t, 2H), 6.89 (d,  $J$  = 1.7 Hz, 2H);  $^{13}\text{C}$  NMR (151 MHz, Chloroform-*d*)  $\delta$ : 158.57, 153.74, 134.46, 129.37, 126.59, 122.67, 121.66, 113.50, 113.42, 77.34, 77.13, 76.91, 0.10; HRMS-ESI  $m/z$  calcd for  $\text{C}_{18}\text{H}_{11}\text{N}_3\text{S}_2^+$  [ $\text{M}^+$ ] 334.0467, found 334.0468.

**Compound 4a:** Bright yellow solid; overall yield 35 mg, 44 %; M.P.: 202-205 °C;  $^1\text{H}$  NMR (600 MHz, Chloroform-*d*)  $\delta$ : 7.85 (d,  $J$  = 8.2 Hz, 2H), 7.67 – 7.62 (m, 6H), 7.56 (t, 2H), 7.44 –

7.39 (m, 6H), 7.08 (d,  $J = 8.1$  Hz, 2H), 5.79 (s, 2H), 4.51 (s, 6H), 3.71 (s, 3H);  $^{13}\text{C}$  NMR (151 MHz, Chloroform- $d$ )  $\delta$ : 147.08, 134.76, 133.19, 132.80, 130.97, 130.88, 128.70, 127.99, 126.44, 126.22, 119.23, 112.45, 111.73, 77.34, 77.13, 76.92, 54.38, 35.01; HRMS-ESI  $m/z$  calcd for  $\text{C}_{32}\text{H}_{26}\text{N}_5^+$  [ $\text{M}^+$ ] 480.2183, found 480.2225.

**Compound 4b:** White solid; overall yield 48 mg, 64 %; M.P.: 290-293 °C;  $^1\text{H}$  NMR (600 MHz, Methanol- $d_4$ )  $\delta$ : 8.02 (dd,  $J = 6.2, 3.2$  Hz, 4H), 7.79 (dd,  $J = 6.3, 3.1$  Hz, 4H), 7.39 (s, 2H), 4.16 (s, 12H);  $^{13}\text{C}$  NMR (151 MHz, Methanol- $d_4$ )  $\delta$ : 144.28, 133.77, 128.86, 120.43, 118.34, 114.33, 54.85, 49.48, 49.34, 49.20, 49.05, 48.91, 48.76, 48.62, 33.85; HRMS-ESI  $m/z$  calcd for  $\text{C}_{22}\text{H}_{22}\text{N}_5^+$  [ $\text{M}^+$ ] 356.1870, found 356.1891.

**Compound 4c:** Pale Yellow solid; overall yield 7 mg, 25 %;  $^1\text{H}$  NMR (600 MHz, Chloroform- $d$ )  $\delta$ : 7.75 (d,  $J = 8.2$  Hz, 2H), 7.53 (t,  $J = 7.7$  Hz, 2H), 7.41 (t,  $J = 7.5$  Hz, 2H), 7.36 (d,  $J = 8.2$  Hz, 2H), 7.30 (d,  $J = 7.2$  Hz, 6H), 7.16 (d,  $J = 5.6$  Hz, 4H), 5.96 (s, 4H), 4.27 (s, 6H), 3.68 (s, 3H). HRMS-ESI  $m/z$  calcd for  $\text{C}_{34}\text{H}_{30}\text{N}_5^+$  [ $\text{M}^+$ ] 508.2496, found 508.2518.

**Compound 4d:** Fluorescent yellow solid; overall yield 8 mg, 23 %;  $^1\text{H}$  NMR (600 MHz, Methanol- $d_4$ )  $\delta$ : 8.27 (t,  $J = 9.4$  Hz, 2H), 8.20 (t,  $J = 9.4$  Hz, 2H), 7.89 (q,  $J = 8.7, 8.0$  Hz, 2H), 7.78 (q,  $J = 9.2, 8.5$  Hz, 2H), 7.57 (d,  $J = 7.2$  Hz, 2H), 4.52 (s, 6H); HRMS-ESI  $m/z$  calcd for  $\text{C}_{20}\text{H}_{16}\text{N}_3\text{S}_2^+$  [ $\text{M}^+$ ] 362.0780, found 362.0811.

## Spectroscopic data for synthesized compounds:

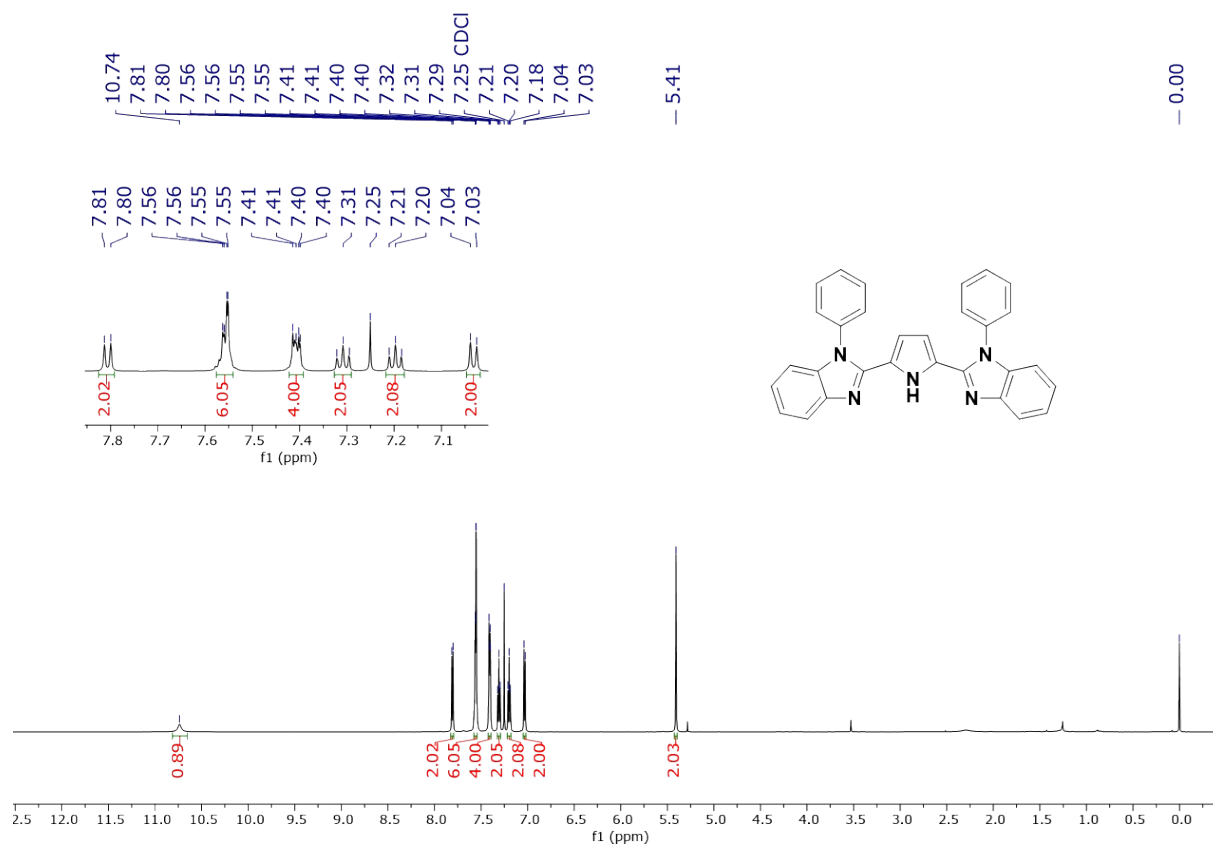

**Figure S12.**  $^1\text{H}$  NMR spectrum of **3a** at 600 MHz in  $\text{CDCl}_3$  at 298K

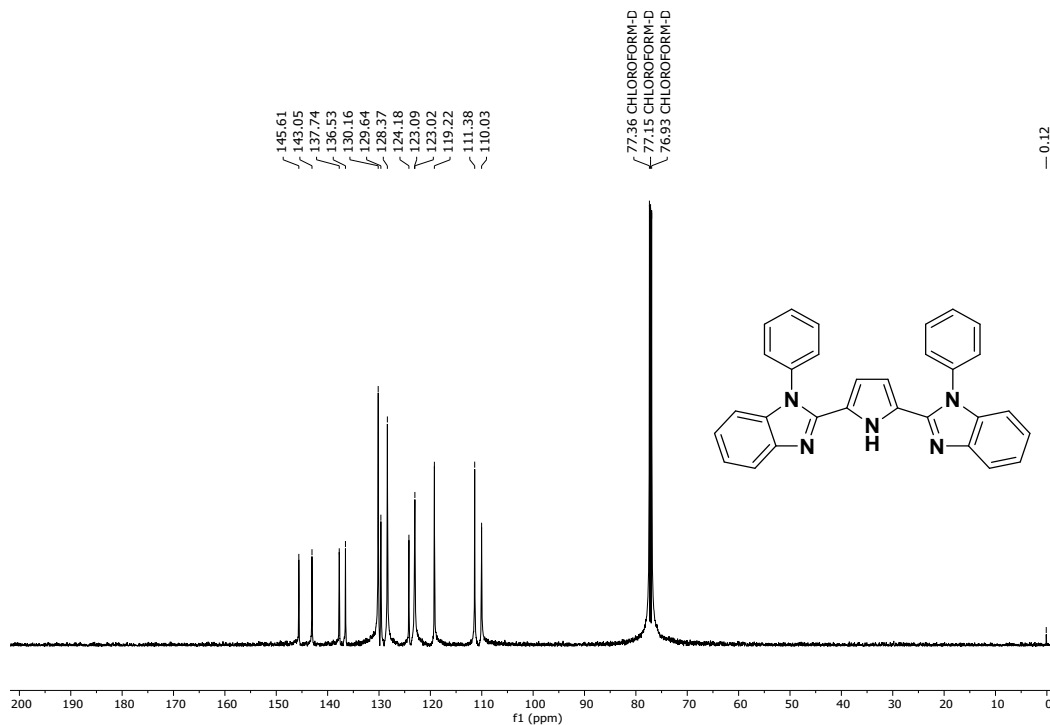

Figure S13.  $^{13}\text{C}$  NMR spectrum of **3a** at 151 MHz in  $\text{CDCl}_3$  at 298K

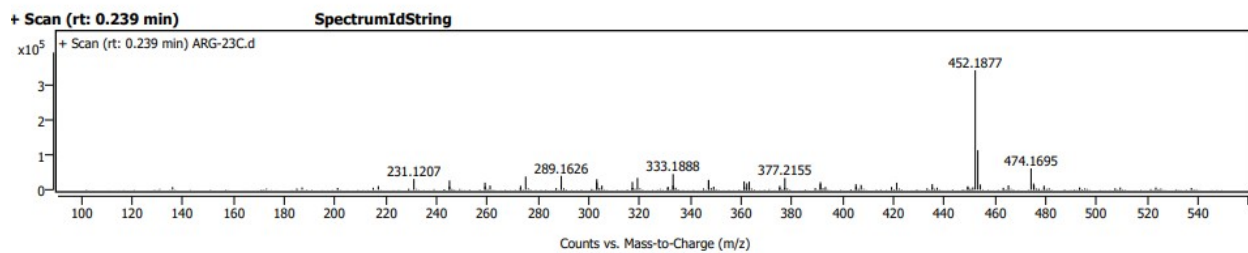

| SpectrumIdString |   | Abund  | Abund % | m/z (Calc) | Diff (ppm) | Ion Species | Formula | Ion Type |
|------------------|---|--------|---------|------------|------------|-------------|---------|----------|
| m/z              | Z |        |         |            |            |             |         |          |
| 231.1207         |   | 30633  | 8.93    |            |            |             |         |          |
| 275.1472         |   | 37792  | 11.02   |            |            |             |         |          |
| 289.1626         |   | 39784  | 11.60   |            |            |             |         |          |
| 303.1421         |   | 30097  | 8.77    |            |            |             |         |          |
| 319.1732         |   | 33971  | 9.90    |            |            |             |         |          |
| 333.1888         |   | 44990  | 13.12   |            |            |             |         |          |
| 377.2155         |   | 33452  | 9.75    |            |            |             |         |          |
| 452.1877         | 1 | 343041 | 100.00  |            |            |             |         |          |
| 453.1910         | 1 | 113299 | 33.03   |            |            |             |         |          |
| 474.1695         |   | 61215  | 17.84   |            |            |             |         |          |

Figure S14. HRMS of **3a** in ESI (+) mode

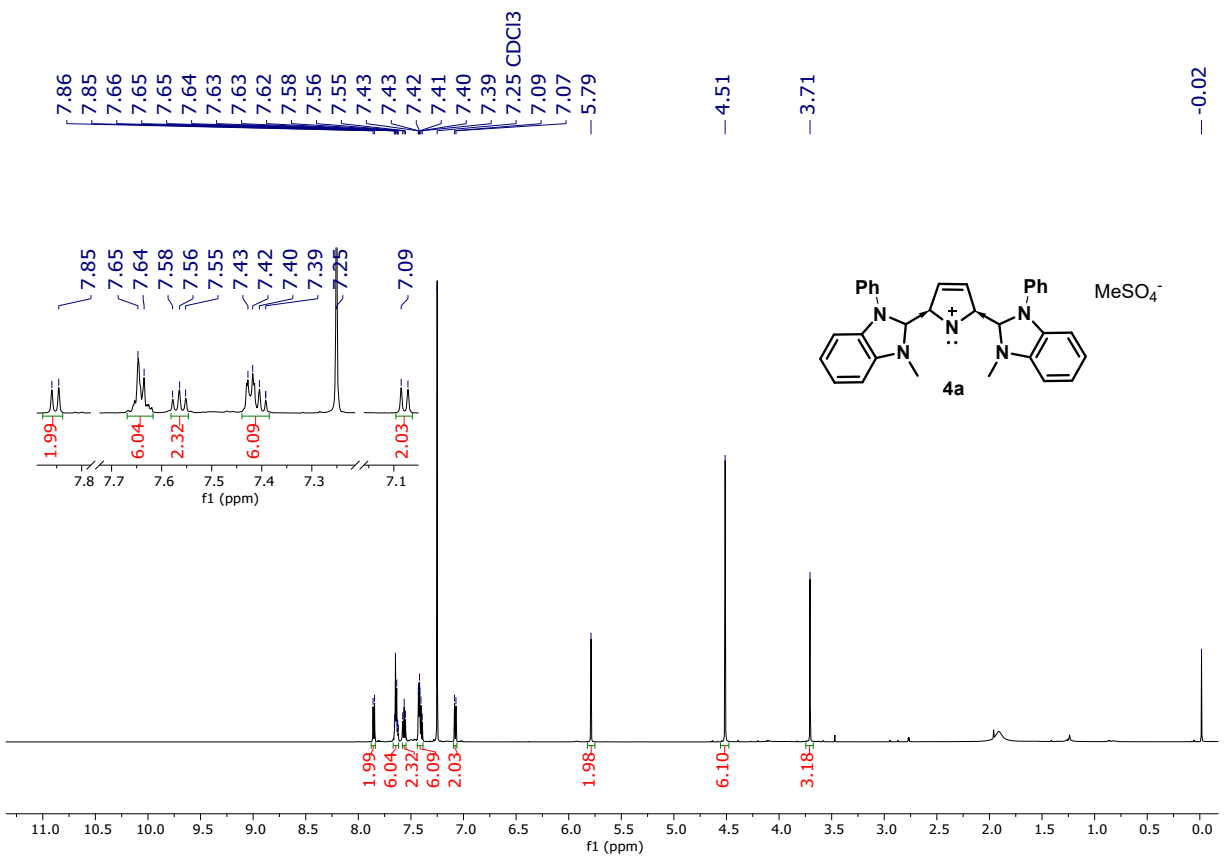

**Figure S15.**  $^1\text{H}$  NMR spectrum of **4a** at 600 MHz in  $\text{CDCl}_3$  at 298K

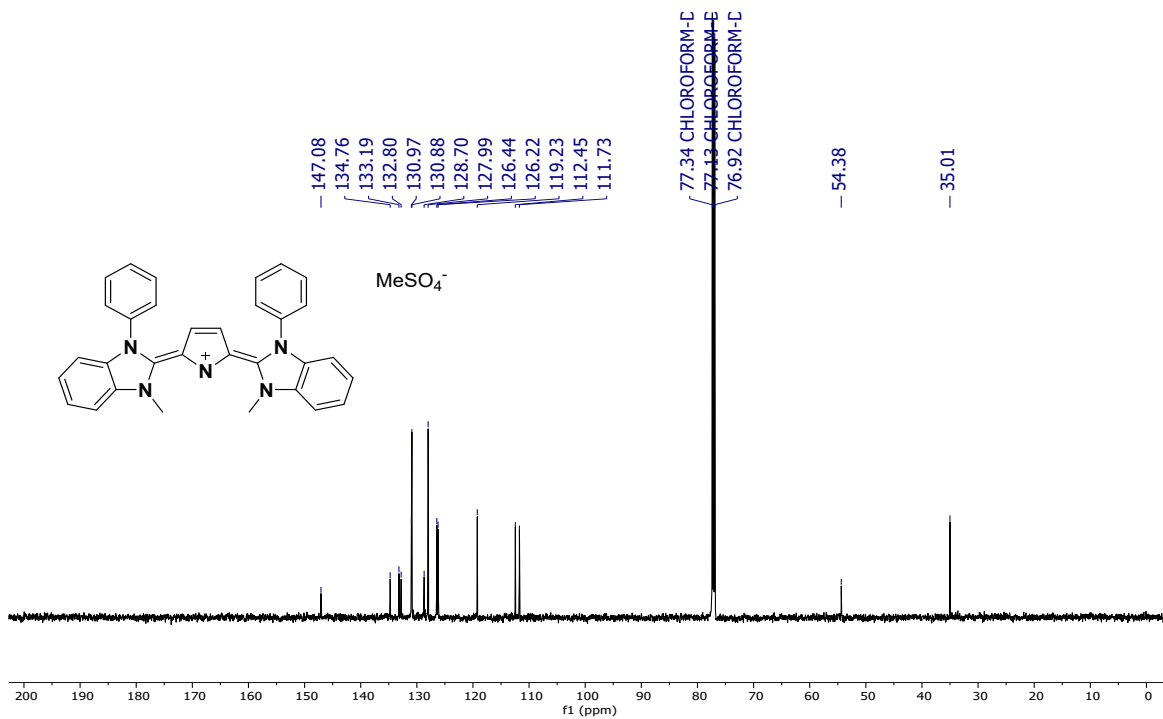

**Figure S16.**  $^{13}\text{C}$  NMR spectrum of **4a** at 151 MHz in  $\text{CDCl}_3$  at 298K

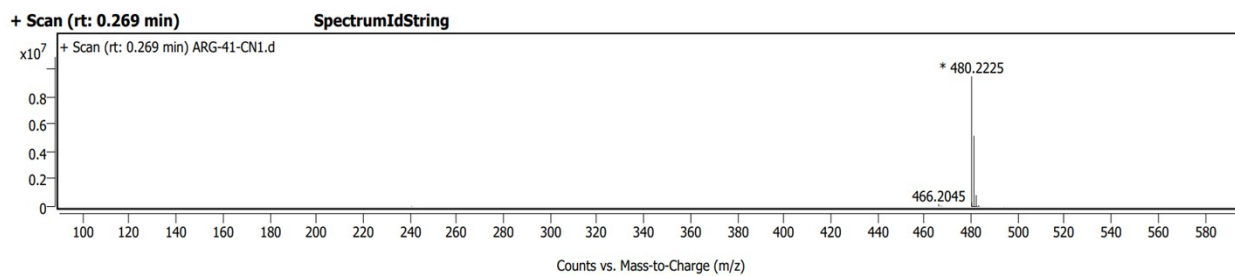

| SpectrumIdString |   | Abund   | Abund % | m/z (Calc) | Diff (ppm) | Ion Species | Formula | Ion Type |
|------------------|---|---------|---------|------------|------------|-------------|---------|----------|
| m/z              | Z |         |         |            |            |             |         |          |
| 466.2045         |   | 176627  | 1.85    |            |            |             |         |          |
| 480.2225         | 1 | 9522580 | 100.00  |            |            |             |         |          |
| 480.3333         |   | 293287  | 3.08    |            |            |             |         |          |
| 481.2251         | 1 | 5174426 | 54.34   |            |            |             |         |          |
| 482.2268         | 1 | 834468  | 8.76    |            |            |             |         |          |
| 483.2297         | 1 | 95770   | 1.01    |            |            |             |         |          |

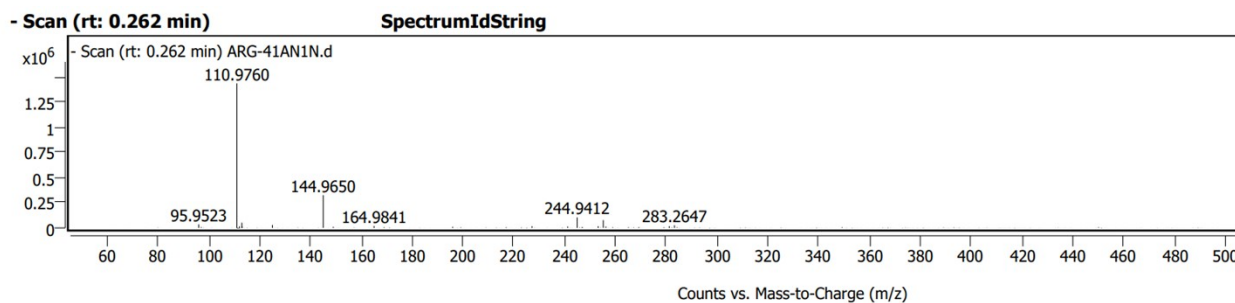

| SpectrumIdString |   | Abund   | Abund % | m/z (Calc) | Diff (ppm) | Ion Species | Formula | Ion Type |
|------------------|---|---------|---------|------------|------------|-------------|---------|----------|
| m/z              | Z |         |         |            |            |             |         |          |
| 95.9523          |   | 36157   | 2.51    |            |            |             |         |          |
| 110.9760         | 1 | 1442350 | 100.00  |            |            |             |         |          |
| 111.9784         | 1 | 16117   | 1.12    |            |            |             |         |          |
| 112.9715         | 1 | 52693   | 3.65    |            |            |             |         |          |
| 124.9915         |   | 29443   | 2.04    |            |            |             |         |          |
| 144.9650         |   | 327111  | 22.68   |            |            |             |         |          |
| 164.9841         |   | 19231   | 1.33    |            |            |             |         |          |
| 227.2021         |   | 16674   | 1.16    |            |            |             |         |          |
| 244.9412         |   | 104366  | 7.24    |            |            |             |         |          |
| 253.2179         |   | 16606   | 1.15    |            |            |             |         |          |
| 255.2338         |   | 77607   | 5.38    |            |            |             |         |          |
| 281.2488         |   | 16924   | 1.17    |            |            |             |         |          |
| 283.2647         |   | 26888   | 1.86    |            |            |             |         |          |

**Figure S17.** HRMS of **4a** in ESI (+) mode and ESI (-) mode

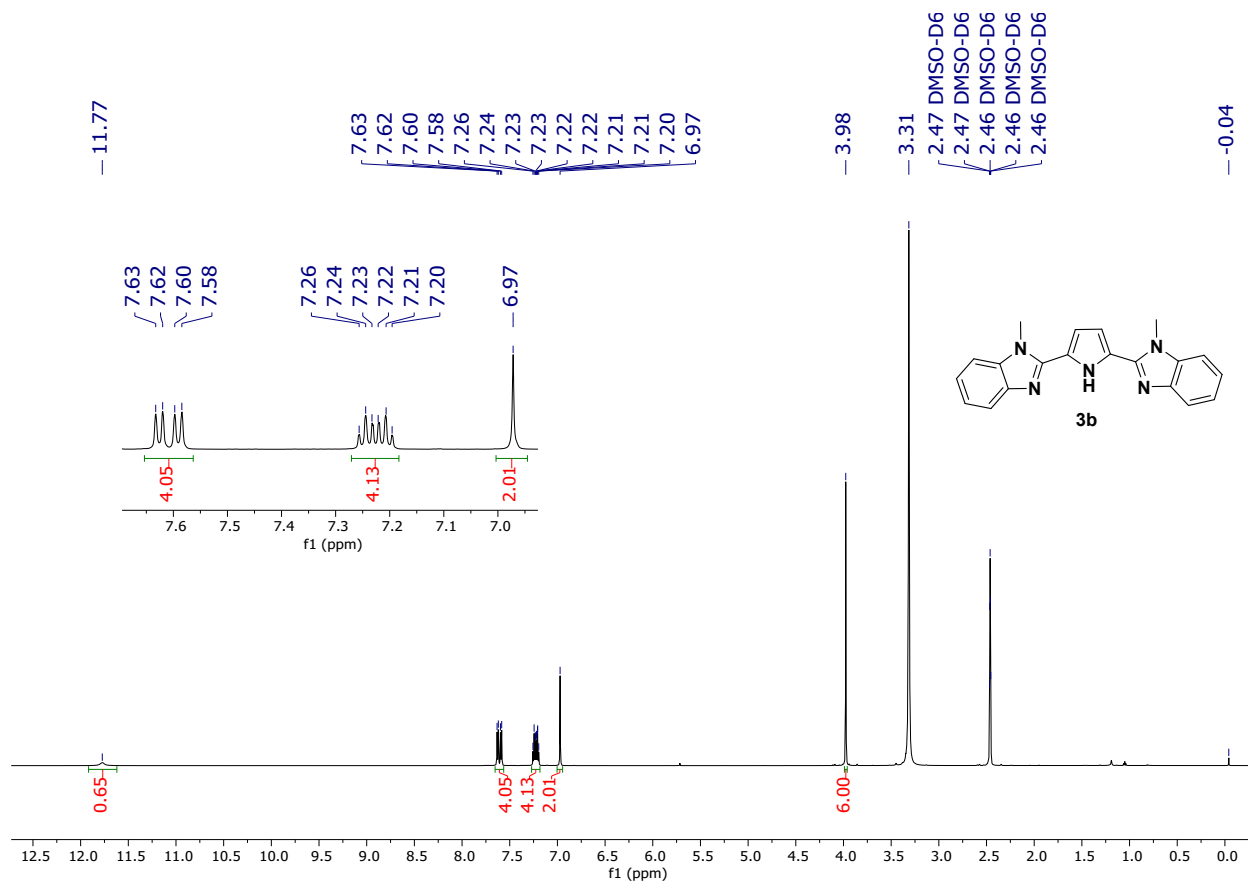

**Figure S18.** <sup>1</sup>H NMR spectrum of **3b** at 600 MHz in DMSO-*d*<sub>6</sub> at 298K



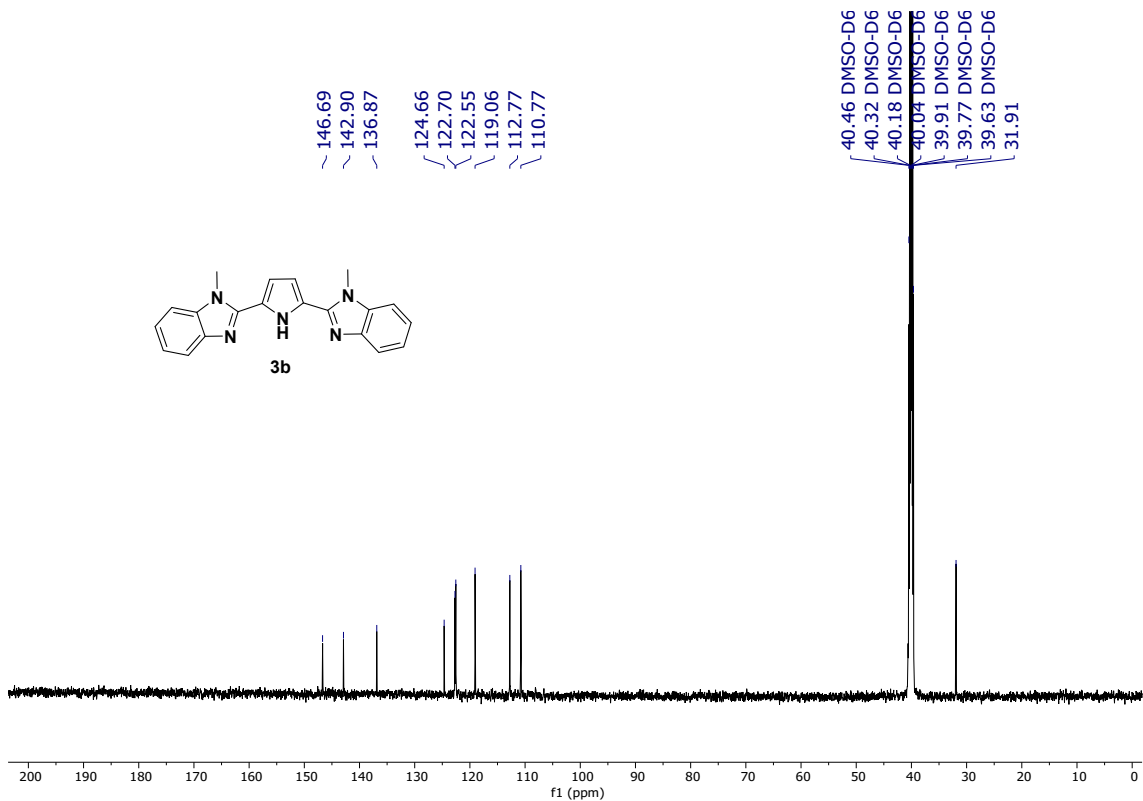

**Figure S19.** <sup>13</sup>C NMR spectrum of **3b** at 150 MHz in DMSO-*d*<sub>6</sub> at 298K

arg 23a\_230516151800 #21 RT: 0.25 AV: 1 NL: 4.63E4  
 T: ITMS + c ESI Full ms [150.00-2000.00]

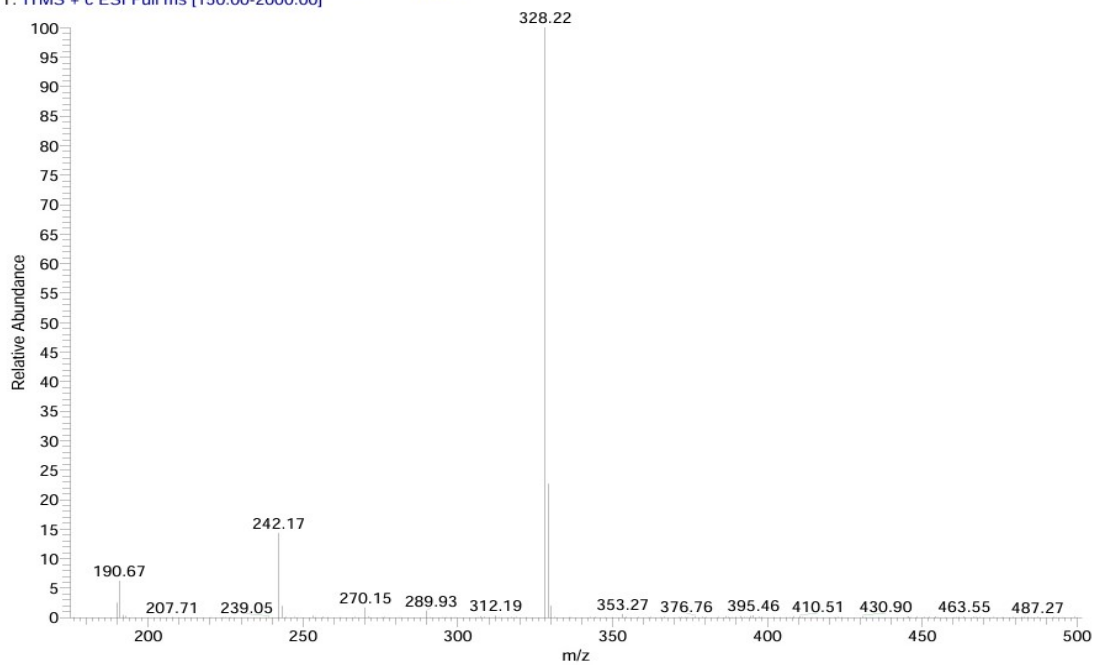

**Figure S20.** LCMS of **3b** in ESI (+) mode

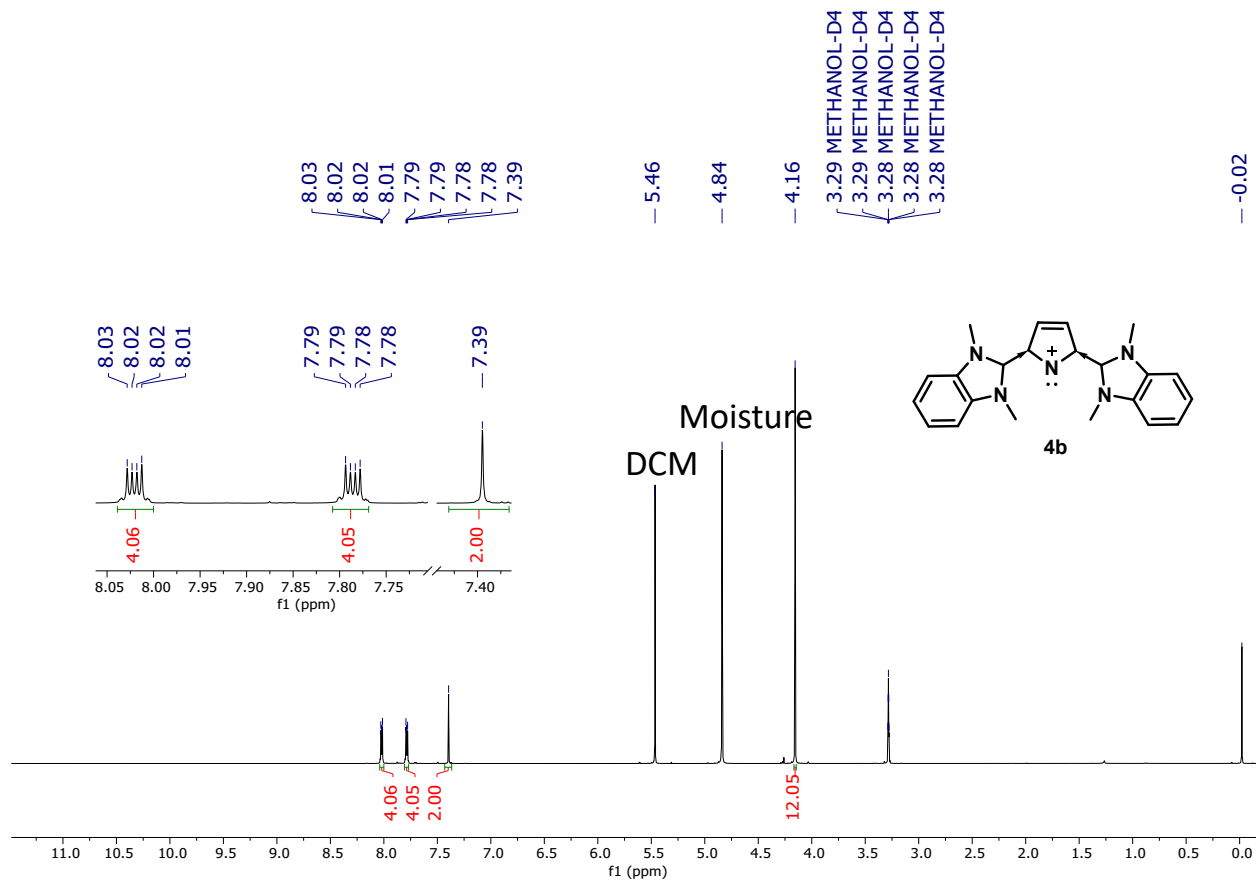

**Figure S21.** <sup>1</sup>H NMR spectrum of **4b** at 600 MHz in Methanol-*d*<sub>4</sub> at 298K

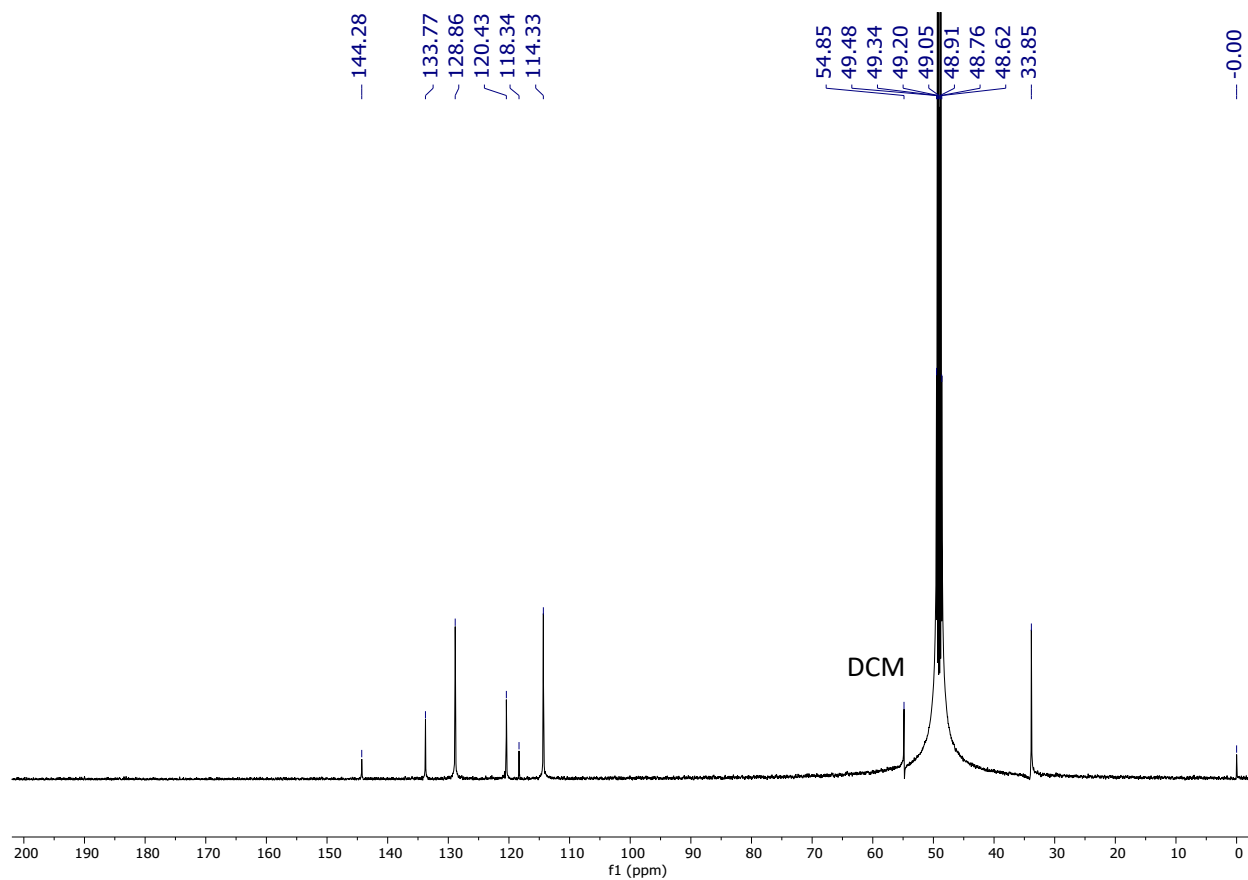

Figure S22.  $^{13}\text{C}$  NMR spectrum of **4b** at 151 MHz in Methanol- $d_4$  at 298K

Peak Spec

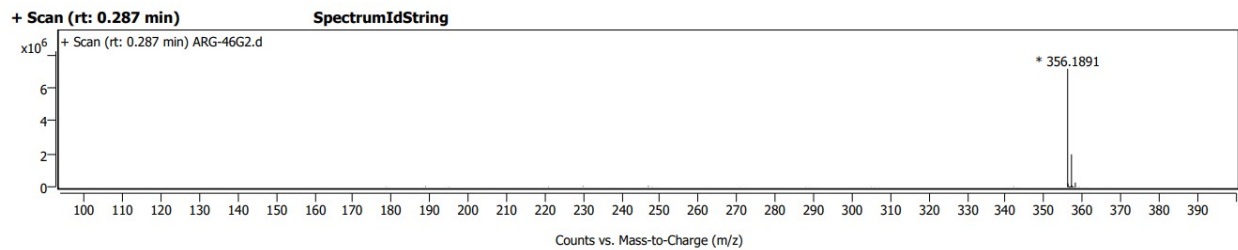

| SpectrumIdString | m/z      | Z | Abund   | Abund % | m/z (Calc) | Diff (ppm) | Ion Species | Formula | Ion Type |
|------------------|----------|---|---------|---------|------------|------------|-------------|---------|----------|
|                  | 356.1891 | 1 | 7166318 | 100.00  |            |            |             |         |          |
|                  | 356.2849 |   | 202885  | 2.83    |            |            |             |         |          |
|                  | 357.1911 | 1 | 1971114 | 27.51   |            |            |             |         |          |
|                  | 357.2139 |   | 81779   | 1.14    |            |            |             |         |          |
|                  | 357.2333 |   | 80092   | 1.12    |            |            |             |         |          |
|                  | 358.1940 | 1 | 256736  | 3.58    |            |            |             |         |          |

Figure S23. HRMS of **4b** in ESI (+) mode

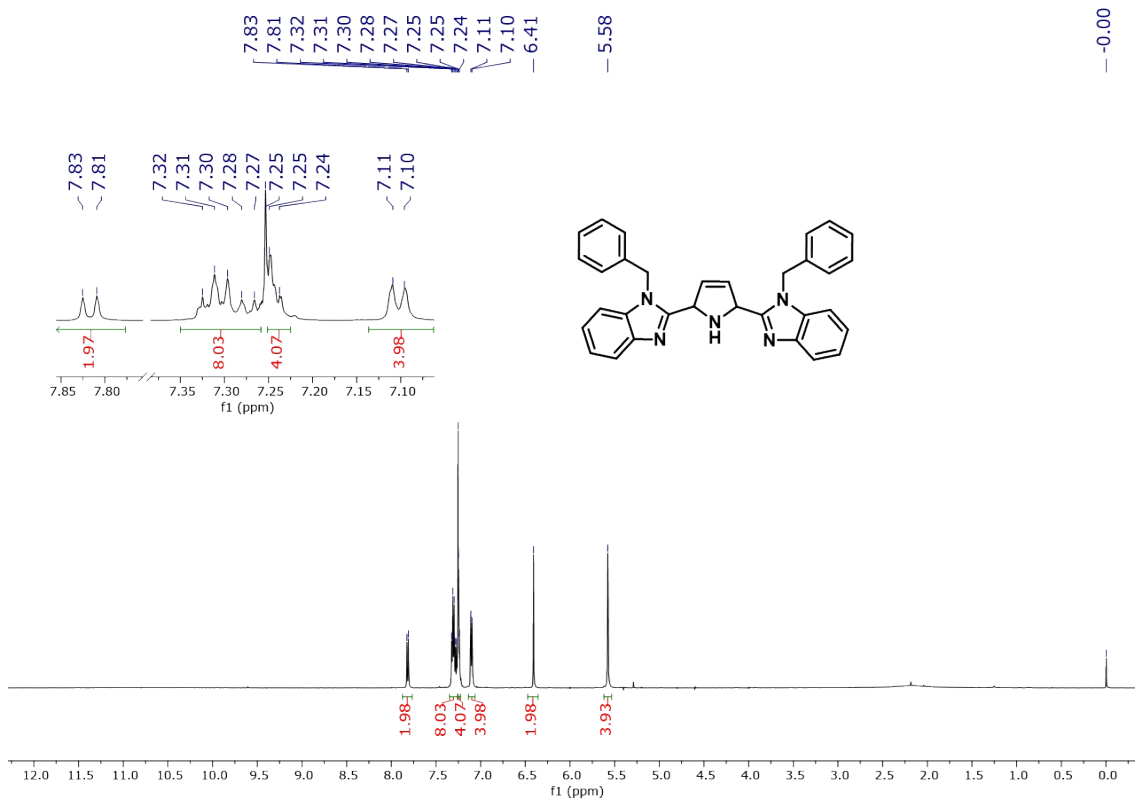

**Figure S24.** <sup>1</sup>H NMR spectrum of **3c** at 600 MHz in CDCl<sub>3</sub> at 298K

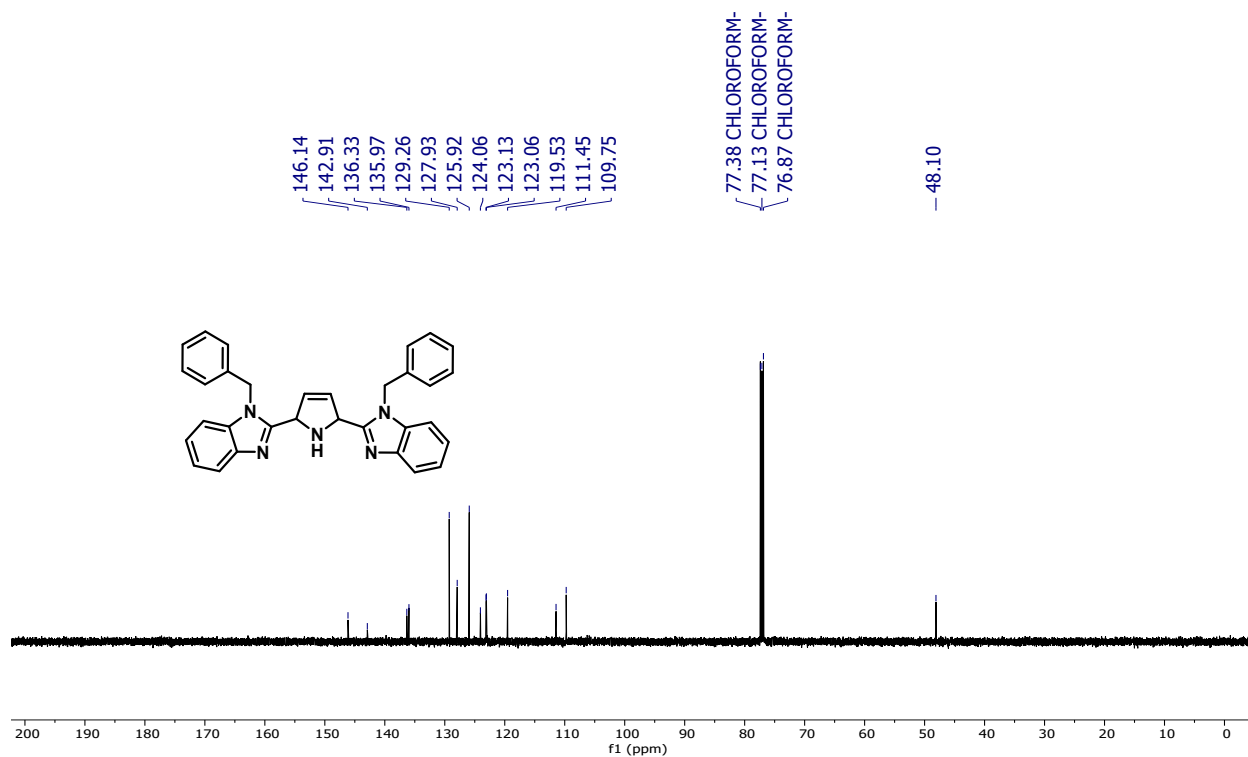

Figure S25. <sup>13</sup>C NMR of 3c at 151 MHz in CDCl<sub>3</sub> at 298K

Sample Spectra

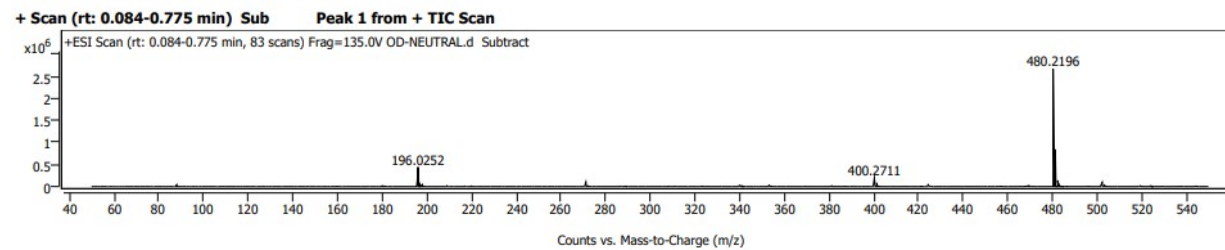

Spectrum Peaks

| m/z      | Z | Abund   | Abund % | m/z (Calc) | Diff (ppm) | Ion Species | Formula | Ion Type |
|----------|---|---------|---------|------------|------------|-------------|---------|----------|
| 196.0252 |   | 440557  | 16.39   |            |            |             |         |          |
| 400.2711 |   | 204961  | 7.62    |            |            |             |         |          |
| 480.2196 | 1 | 2688771 | 100.00  |            |            |             |         |          |
| 481.2222 | 1 | 866263  | 32.22   |            |            |             |         |          |
| 482.2251 | 1 | 140647  | 5.23    |            |            |             |         |          |

Figure S26. HRMS of 3c in ESI (+) mode

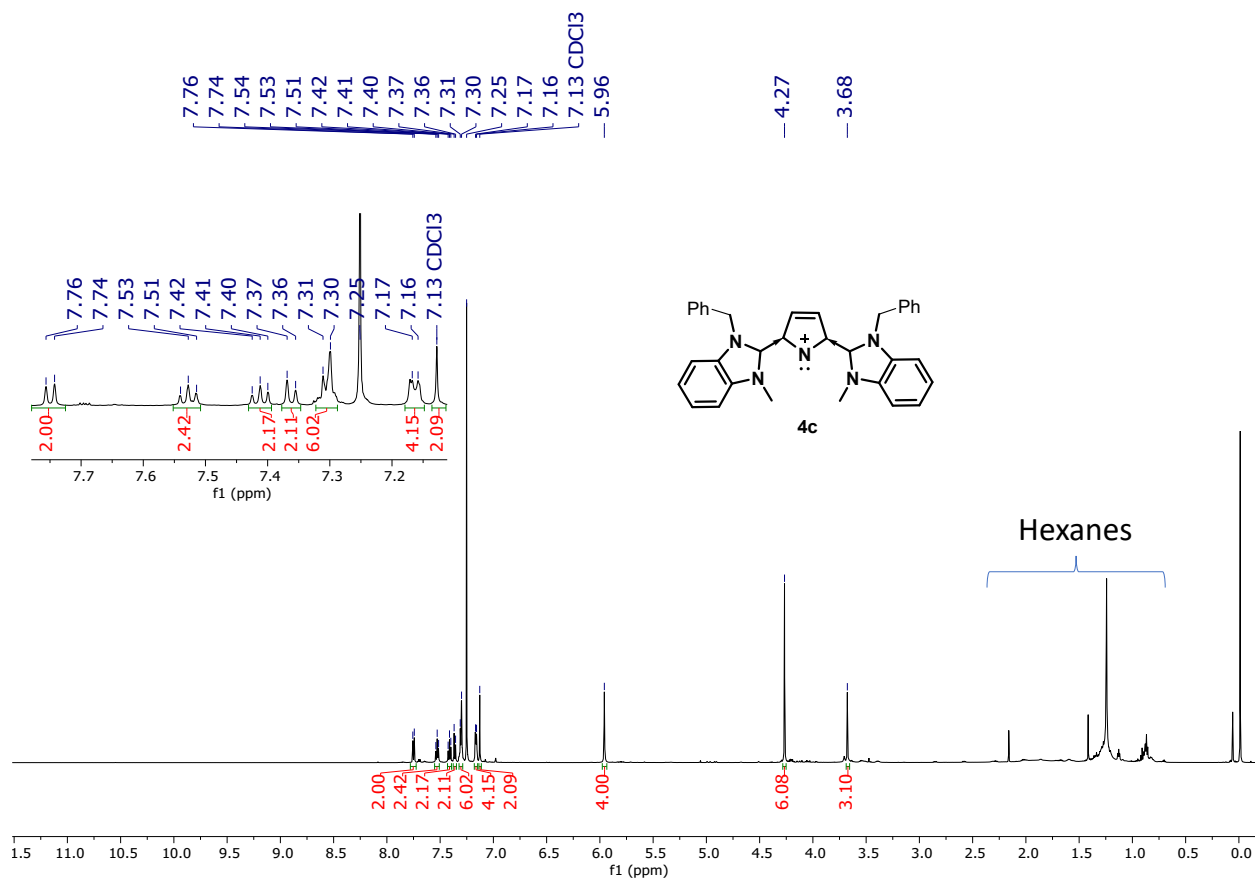

Figure S27.  $^1\text{H}$  NMR spectrum of **4c** at 600 MHz in  $\text{CDCl}_3$  at 298K

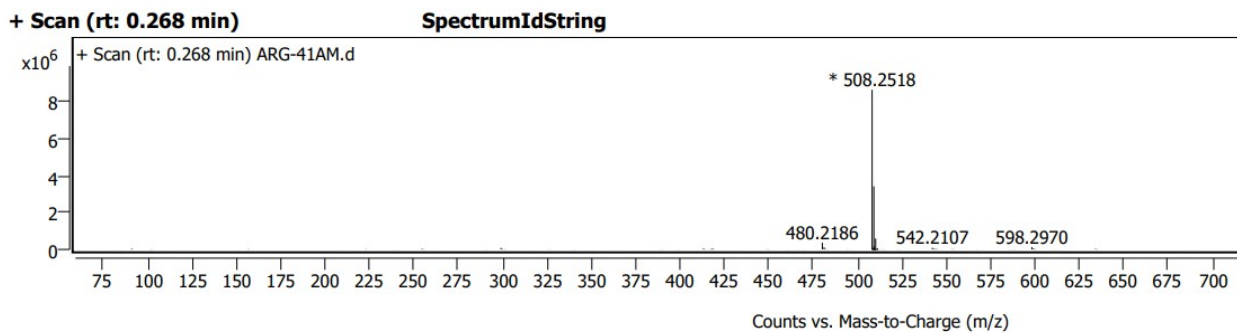

| <i>SpectrumIdString</i> | <i>m/z</i> | <i>Z</i> | <i>Abund</i> | <i>Abund %</i> | <i>m/z (Calc)</i> | <i>Diff (ppm)</i> | <i>Ion Species</i> | <i>Formula</i> |
|-------------------------|------------|----------|--------------|----------------|-------------------|-------------------|--------------------|----------------|
|                         | 480.2186   | 1        | 365730       | 4.21           |                   |                   |                    |                |
|                         | 481.2216   | 1        | 118175       | 1.36           |                   |                   |                    |                |
|                         | 508.2518   | 1        | 8686593      | 100.00         |                   |                   |                    |                |
|                         | 509.2538   | 1        | 3436047      | 39.56          |                   |                   |                    |                |
|                         | 509.2768   |          | 185026       | 2.13           |                   |                   |                    |                |
|                         | 510.2562   | 1        | 595958       | 6.86           |                   |                   |                    |                |
|                         | 542.2107   |          | 90864        | 1.05           |                   |                   |                    |                |
|                         | 598.2970   |          | 126177       | 1.45           |                   |                   |                    |                |

Figure S28. HRMS of **4c** in ESI (+) mode

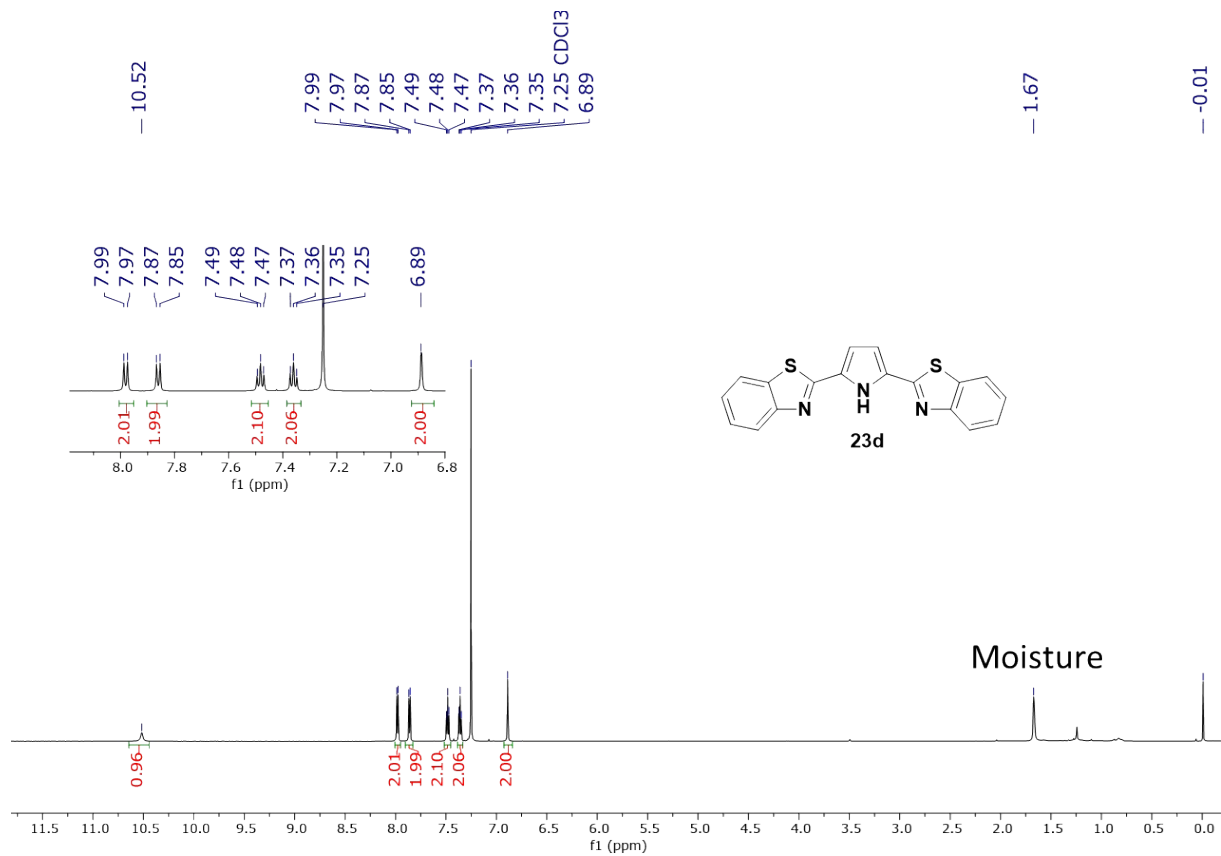

**Figure S29.**  $^1\text{H}$  NMR spectrum of **3d** at 600 MHz in  $\text{CDCl}_3$  at 298K

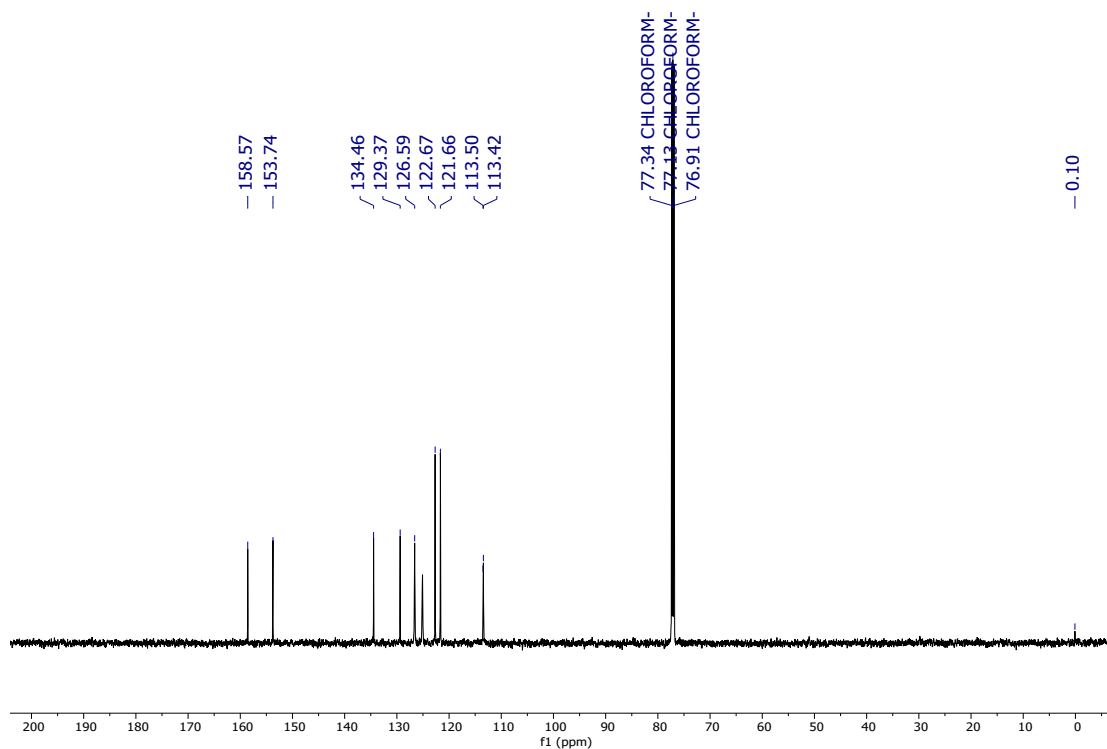

Figure S30.  $^{13}\text{C}$  NMR spectrum of **3d** at 150 MHz in  $\text{CDCl}_3$  at 298K

Peak Spec

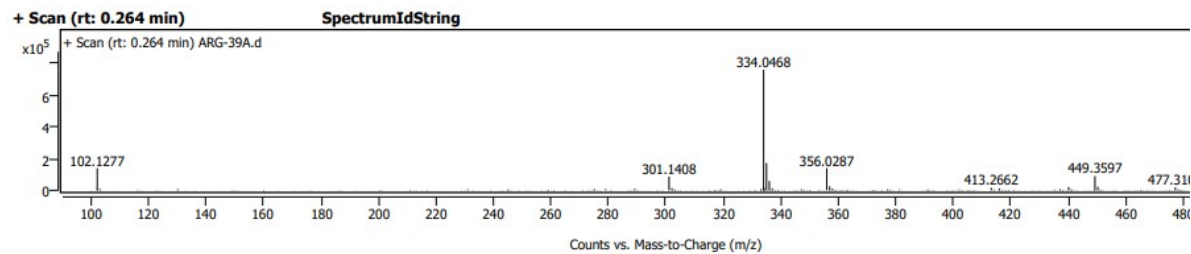

| SpectrumIdString |   | Abund  | Abund % | m/z (Calc) | Diff (ppm) | Ion Species | Formula | Ion Type |
|------------------|---|--------|---------|------------|------------|-------------|---------|----------|
| m/z              | Z |        |         |            |            |             |         |          |
| 102.1277         |   | 139821 | 18.32   |            |            |             |         |          |
| 102.1343         |   | 8288   | 1.09    |            |            |             |         |          |
| 289.1621         |   | 9470   | 1.24    |            |            |             |         |          |
| 301.1408         | 1 | 86609  | 11.35   |            |            |             |         |          |
| 302.1444         | 1 | 13651  | 1.79    |            |            |             |         |          |
| 333.1882         |   | 8736   | 1.14    |            |            |             |         |          |
| 334.0468         | 1 | 763300 | 100.00  |            |            |             |         |          |
| 334.1414         |   | 17798  | 2.33    |            |            |             |         |          |
| 335.0497         | 1 | 172811 | 22.64   |            |            |             |         |          |
| 336.0436         | 1 | 58423  | 7.65    |            |            |             |         |          |
| 337.0468         |   | 12369  | 1.62    |            |            |             |         |          |
| 356.0287         | 1 | 139020 | 18.21   |            |            |             |         |          |
| 357.0313         | 1 | 25494  | 3.34    |            |            |             |         |          |
| 358.0252         | 1 | 10801  | 1.42    |            |            |             |         |          |
| 413.2662         |   | 16344  | 2.14    |            |            |             |         |          |
| 416.0881         |   | 12236  | 1.60    |            |            |             |         |          |
| 440.2195         |   | 20614  | 2.70    |            |            |             |         |          |
| 449.3597         | 1 | 90409  | 11.84   |            |            |             |         |          |
| 450.3630         | 1 | 23015  | 3.02    |            |            |             |         |          |
| 477.3106         |   | 18539  | 2.43    |            |            |             |         |          |

Figure S31. HRMS of **3d** in ESI (+) mode



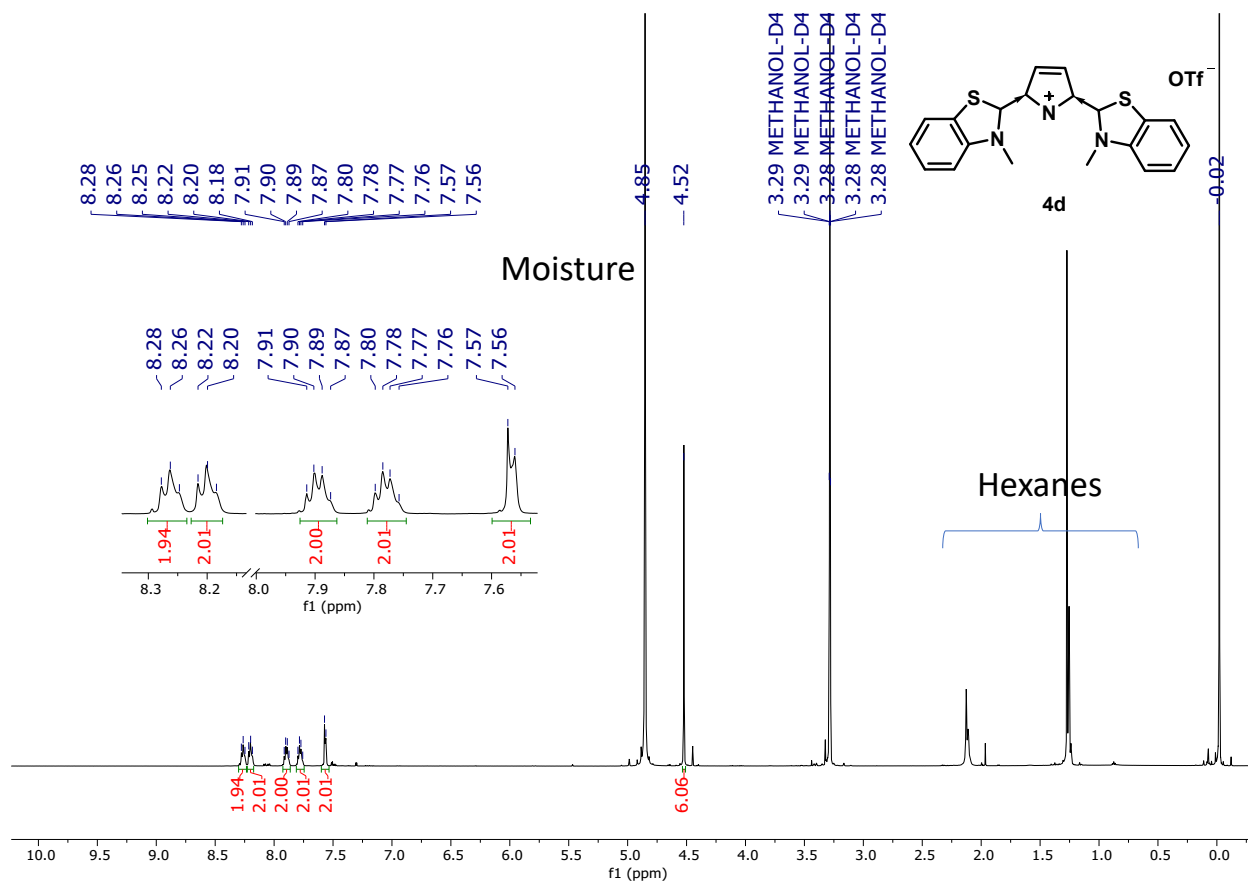

**Figure S32.** <sup>1</sup>H NMR spectrum of **4d** at 600 MHz Methanol-*d*<sub>4</sub> at 298K. Only 1H NMR could be generated as we got very less compound in hand.

#### Peak Spec

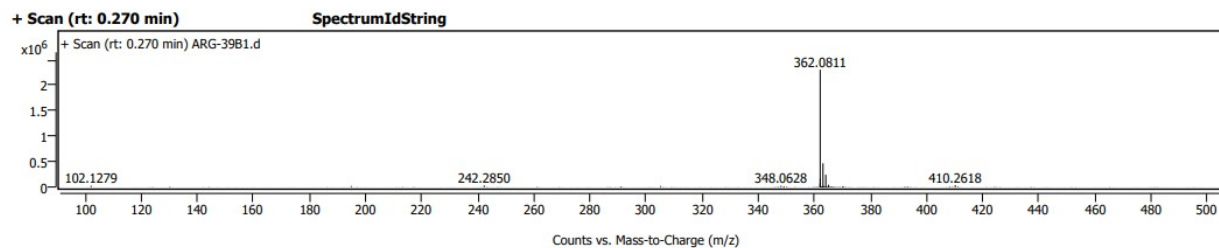

| SpectrumIdString | m/z      | Z | Abund   | Abund % | m/z (Calc) | Diff (ppm) | Ion Species | Formula | Ion Type |
|------------------|----------|---|---------|---------|------------|------------|-------------|---------|----------|
|                  | 102.1279 |   | 24630   | 1.07    |            |            |             |         |          |
|                  | 242.2850 |   | 29943   | 1.30    |            |            |             |         |          |
|                  | 348.0628 |   | 24509   | 1.06    |            |            |             |         |          |
|                  | 362.0483 |   | 69955   | 3.03    |            |            |             |         |          |
|                  | 362.0811 | 1 | 2309869 | 100.00  |            |            |             |         |          |
|                  | 362.1096 |   | 167677  | 7.26    |            |            |             |         |          |
|                  | 363.0831 | 1 | 466675  | 20.20   |            |            |             |         |          |
|                  | 364.0783 | 1 | 240768  | 10.42   |            |            |             |         |          |
|                  | 365.0788 |   | 43922   | 1.90    |            |            |             |         |          |
|                  | 410.2618 |   | 36145   | 1.56    |            |            |             |         |          |

**Figure S33.** HRMS of **4d** in ESI (+) mode

### Crystallographic Details:

The CrysAlisPro software was used for data acquisition and data extraction. Using OLEX2,<sup>16</sup> the structures were solved with the SIR2004<sup>17</sup> structure solution program using direct methods and refined with the SHELXL<sup>18</sup> refinement package using Least Squares minimization. All non-hydrogen atoms were refined with anisotropic thermal parameters. In the ORTEP diagram, ellipsoids were set at 50 % probability. The data was collected at room temperature and methyl sulphate anion in the unit cell was found to be disordered. An appropriate disordered treatment model was applied and hydrogens of the water molecule were omitted while the disorder treatment. Detailed crystallographic data and structural refinement parameters are summarized in Table S5-S8. Deposition Number CCDC2299060 contains the supplementary crystallographic data for this paper. The data are provided free of charge by the Cambridge Crystallographic Data Centre. <http://www.ccdc.cam.ac.uk/services/structures>.

**Table S5.** Crystal data and structure refinement for Compound **4a**

|                                      |                                                                 |
|--------------------------------------|-----------------------------------------------------------------|
| Identification code                  | ex-nippe_autored                                                |
| Empirical formula                    | C <sub>33</sub> H <sub>26</sub> N <sub>5</sub> O <sub>7</sub> S |
| Formula weight                       | 636.670                                                         |
| Temperature/K                        | 222.15                                                          |
| Crystal system                       | triclinic                                                       |
| Space group                          | P-1                                                             |
| a/Å                                  | 11.0277(5)                                                      |
| b/Å                                  | 12.5158(4)                                                      |
| c/Å                                  | 13.0402(5)                                                      |
| α/°                                  | 72.121(4)                                                       |
| β/°                                  | 65.597(4)                                                       |
| γ/°                                  | 88.754(3)                                                       |
| Volume/Å <sup>3</sup>                | 1548.36(13)                                                     |
| Z                                    | 2                                                               |
| ρ <sub>calc</sub> /g/cm <sup>3</sup> | 1.366                                                           |
| μ/mm <sup>-1</sup>                   | 0.162                                                           |
| F(000)                               | 662.7                                                           |
| Crystal size/mm <sup>3</sup>         | 0.02 × 0.012 × 0.01                                             |

Radiation Mo K $\alpha$  ( $\lambda = 0.71073$ )  
 2 $\Theta$  range for data collection/ $^{\circ}$  6.52 to 54.18  
 Index ranges  $-13 \leq h \leq 14, -14 \leq k \leq 15, -16 \leq l \leq 16$   
 Reflections collected 24433  
 Independent reflections 6459 [ $R_{\text{int}} = 0.0513, R_{\text{sigma}} = 0.0600$ ]  
 Data/restraints/parameters 6459/66/435  
 Goodness-of-fit on  $F^2$  1.246  
 Final R indexes [ $I \geq 2\sigma(I)$ ]  $R_1 = 0.1043, wR_2 = 0.3178$   
 Final R indexes [all data]  $R_1 = 0.1414, wR_2 = 0.3471$   
 Largest diff. peak/hole / e  $\text{\AA}^{-3}$  0.95/-1.11

**Table S6.** Bond Lengths Compound **4a**

| Atom | Atom | Length/ $\text{\AA}$ | Atom | Atom | Length/ $\text{\AA}$ |
|------|------|----------------------|------|------|----------------------|
| N2   | C8   | 1.437(4)             | C9   | C10  | 1.381(5)             |
| N2   | C7   | 1.396(4)             | C20  | C25  | 1.379(5)             |
| N2   | C14  | 1.354(4)             | C20  | C21  | 1.357(5)             |
| N3   | C18  | 1.357(4)             | C6   | C5   | 1.377(5)             |
| N3   | C15  | 1.374(4)             | C27  | C28  | 1.363(5)             |
| N4   | C19  | 1.358(4)             | C30  | C29  | 1.367(6)             |
| N4   | C26  | 1.384(4)             | C13  | C12  | 1.372(5)             |
| N4   | C20  | 1.446(4)             | C5   | C4   | 1.395(5)             |
| N5   | C19  | 1.356(4)             | C25  | C24  | 1.371(5)             |
| N5   | C31  | 1.389(4)             | C3   | C4   | 1.385(6)             |
| N5   | C32  | 1.448(5)             | C28  | C29  | 1.412(6)             |
| N1   | C14  | 1.354(4)             | C10  | C11  | 1.401(6)             |
| N1   | C2   | 1.394(4)             | C11  | C12  | 1.368(6)             |
| N1   | C1   | 1.476(5)             | C24  | C23  | 1.370(6)             |
| C8   | C9   | 1.379(5)             | C23  | C22  | 1.371(6)             |
| C8   | C13  | 1.378(4)             | C21  | C22  | 1.380(6)             |
| C7   | C2   | 1.388(5)             | S1A  | O2A  | 1.374(11)            |
| C7   | C6   | 1.380(5)             | S1A  | O1A  | 1.268(7)             |
| C19  | C18  | 1.441(5)             | S1A  | O3A  | 1.413(7)             |
| C31  | C26  | 1.390(5)             | S1A  | O4A  | 1.659(11)            |
| C31  | C30  | 1.393(5)             | S1B  | O2B  | 1.77(3)              |
| C14  | C15  | 1.436(5)             | S1B  | O1B  | 1.27(2)              |
| C2   | C3   | 1.382(5)             | S1B  | O3B  | 1.175(17)            |
| C16  | C17  | 1.379(5)             | S1B  | C33B | 1.31(3)              |

|     |     |          |     |      |         |
|-----|-----|----------|-----|------|---------|
| C16 | C15 | 1.399(5) | S1B | O4B  | 1.60(2) |
| C26 | C27 | 1.400(5) | O2B | O3B  | 1.76(3) |
| C18 | C17 | 1.416(4) | O1B | C33B | 0.90(5) |

**Table S7.** Bond Angles for Compound **4a**

| <b>Atom Atom Atom Angle/°</b> |     |     |          | <b>Atom Atom Atom Angle/°</b> |     |     |           |
|-------------------------------|-----|-----|----------|-------------------------------|-----|-----|-----------|
| C7                            | N2  | C8  | 123.8(3) | C5                            | C6  | C7  | 116.7(3)  |
| C14                           | N2  | C8  | 126.4(3) | C18                           | C17 | C16 | 106.0(3)  |
| C14                           | N2  | C7  | 109.8(3) | C14                           | C15 | N3  | 121.3(3)  |
| C15                           | N3  | C18 | 104.7(3) | C16                           | C15 | N3  | 111.6(3)  |
| C26                           | N4  | C19 | 109.1(3) | C16                           | C15 | C14 | 127.2(3)  |
| C20                           | N4  | C19 | 126.9(3) | C28                           | C27 | C26 | 116.1(4)  |
| C20                           | N4  | C26 | 124.0(3) | C29                           | C30 | C31 | 116.2(4)  |
| C31                           | N5  | C19 | 108.8(3) | C12                           | C13 | C8  | 118.9(3)  |
| C32                           | N5  | C19 | 127.4(3) | C4                            | C5  | C6  | 122.1(3)  |
| C32                           | N5  | C31 | 123.7(3) | C24                           | C25 | C20 | 119.6(4)  |
| C2                            | N1  | C14 | 109.2(3) | C4                            | C3  | C2  | 117.2(4)  |
| C1                            | N1  | C14 | 129.3(3) | C29                           | C28 | C27 | 122.1(4)  |
| C1                            | N1  | C2  | 121.4(3) | C3                            | C4  | C5  | 120.8(3)  |
| C9                            | C8  | N2  | 118.9(3) | C28                           | C29 | C30 | 122.0(3)  |
| C13                           | C8  | N2  | 119.7(3) | C11                           | C10 | C9  | 119.7(4)  |
| C13                           | C8  | C9  | 121.3(3) | C12                           | C11 | C10 | 119.4(4)  |
| C2                            | C7  | N2  | 106.1(3) | C23                           | C24 | C25 | 119.8(4)  |
| C6                            | C7  | N2  | 132.1(3) | C11                           | C12 | C13 | 121.3(3)  |
| C6                            | C7  | C2  | 121.8(3) | C22                           | C23 | C24 | 119.9(4)  |
| N5                            | C19 | N4  | 108.2(3) | C22                           | C21 | C20 | 118.8(4)  |
| C18                           | C19 | N4  | 125.0(3) | C21                           | C22 | C23 | 120.7(4)  |
| C18                           | C19 | N5  | 126.7(3) | O1A                           | S1A | O2A | 106.5(6)  |
| C26                           | C31 | N5  | 107.1(3) | O3A                           | S1A | O2A | 120.4(6)  |
| C30                           | C31 | N5  | 130.9(3) | O3A                           | S1A | O1A | 123.0(5)  |
| C30                           | C31 | C26 | 121.9(3) | O4A                           | S1A | O2A | 98.6(6)   |
| N1                            | C14 | N2  | 107.7(3) | O4A                           | S1A | O1A | 110.8(7)  |
| C15                           | C14 | N2  | 124.6(3) | O4A                           | S1A | O3A | 93.2(5)   |
| C15                           | C14 | N1  | 127.4(3) | O1B                           | S1B | O2B | 105.2(15) |
| C7                            | C2  | N1  | 107.2(3) | O3B                           | S1B | O2B | 70.2(14)  |

|     |     |     |          |      |      |      |           |
|-----|-----|-----|----------|------|------|------|-----------|
| C3  | C2  | N1  | 131.4(3) | O3B  | S1B  | O1B  | 137.8(15) |
| C3  | C2  | C7  | 121.4(3) | C33B | S1B  | O2B  | 118(2)    |
| C15 | C16 | C17 | 106.3(3) | C33B | S1B  | O1B  | 41(2)     |
| C31 | C26 | N4  | 106.8(3) | C33B | S1B  | O3B  | 102(3)    |
| C27 | C26 | N4  | 131.5(3) | O4B  | S1B  | O2B  | 89.9(13)  |
| C27 | C26 | C31 | 121.6(3) | O4B  | S1B  | O1B  | 122.6(13) |
| C19 | C18 | N3  | 121.5(3) | O4B  | S1B  | O3B  | 99.5(13)  |
| C17 | C18 | N3  | 111.4(3) | O4B  | S1B  | C33B | 149(3)    |
| C17 | C18 | C19 | 127.0(3) | O3B  | O2B  | S1B  | 38.8(8)   |
| C10 | C9  | C8  | 119.2(3) | C33B | O1B  | S1B  | 72(3)     |
| C25 | C20 | N4  | 119.5(3) | O2B  | O3B  | S1B  | 71.0(14)  |
| C21 | C20 | N4  | 119.4(3) | O1B  | C33B | S1B  | 67(3)     |
| C21 | C20 | C25 | 121.2(4) |      |      |      |           |

**Table S8.** Torsional angles for Compound **4a**

| <b>A</b> | <b>B</b> | <b>C</b> | <b>D</b> | <b>Angle/°</b> | <b>A</b> | <b>B</b> | <b>C</b> | <b>D</b> | <b>Angle/°</b> |
|----------|----------|----------|----------|----------------|----------|----------|----------|----------|----------------|
| N2       | C8       | C9       | C10      | -179.1(3)      | N5       | C31      | C26      | C27      | 179.5(3)       |
| N2       | C8       | C13      | C12      | 178.4(3)       | N5       | C31      | C30      | C29      | 178.0(4)       |
| N2       | C7       | C2       | N1       | -0.0(3)        | N1       | C14      | C15      | C16      | 148.7(3)       |
| N2       | C7       | C2       | C3       | -178.7(3)      | N1       | C2       | C7       | C6       | 179.1(2)       |
| N2       | C7       | C6       | C5       | 178.1(4)       | N1       | C2       | C3       | C4       | -178.3(4)      |
| N2       | C14      | N1       | C2       | 0.9(3)         | C8       | C9       | C10      | C11      | 1.2(4)         |
| N2       | C14      | N1       | C1       | 177.5(3)       | C8       | C13      | C12      | C11      | 0.0(4)         |
| N2       | C14      | C15      | N3       | 155.6(3)       | C7       | C2       | C3       | C4       | 0.1(4)         |
| N2       | C14      | C15      | C16      | -26.0(4)       | C7       | C6       | C5       | C4       | 0.7(4)         |
| N3       | C18      | C19      | N4       | -157.2(3)      | C19      | C18      | C17      | C16      | 177.7(4)       |
| N3       | C18      | C19      | N5       | 25.8(4)        | C31      | C26      | C27      | C28      | 2.8(4)         |
| N3       | C18      | C17      | C16      | 0.4(3)         | C31      | C30      | C29      | C28      | 0.9(4)         |
| N3       | C15      | C14      | N1       | -29.7(4)       | C14      | C15      | C16      | C17      | -179.1(4)      |
| N3       | C15      | C16      | C17      | -0.6(3)        | C2       | C3       | C4       | C5       | -0.1(4)        |
| N4       | C19      | N5       | C31      | -1.7(3)        | C26      | C27      | C28      | C29      | -1.0(4)        |
| N4       | C19      | N5       | C32      | -178.9(3)      | C9       | C10      | C11      | C12      | -1.7(4)        |
| N4       | C19      | C18      | C17      | 25.8(4)        | C20      | C25      | C24      | C23      | 0.7(5)         |
| N4       | C26      | C31      | N5       | -0.9(3)        | C20      | C21      | C22      | C23      | 0.0(6)         |
| N4       | C26      | C31      | C30      | 176.9(3)       | C6       | C5       | C4       | C3       | -0.3(4)        |
| N4       | C26      | C27      | C28      | -176.8(4)      | C27      | C28      | C29      | C30      | -0.8(4)        |

|    |     |     |     |           |     |     |     |     |         |
|----|-----|-----|-----|-----------|-----|-----|-----|-----|---------|
| N4 | C20 | C25 | C24 | 177.5(3)  | C13 | C12 | C11 | C10 | 1.1(5)  |
| N4 | C20 | C21 | C22 | -177.9(4) | C25 | C24 | C23 | C22 | 0.1(5)  |
| N5 | C19 | C18 | C17 | -151.2(3) | C24 | C23 | C22 | C21 | -0.4(6) |

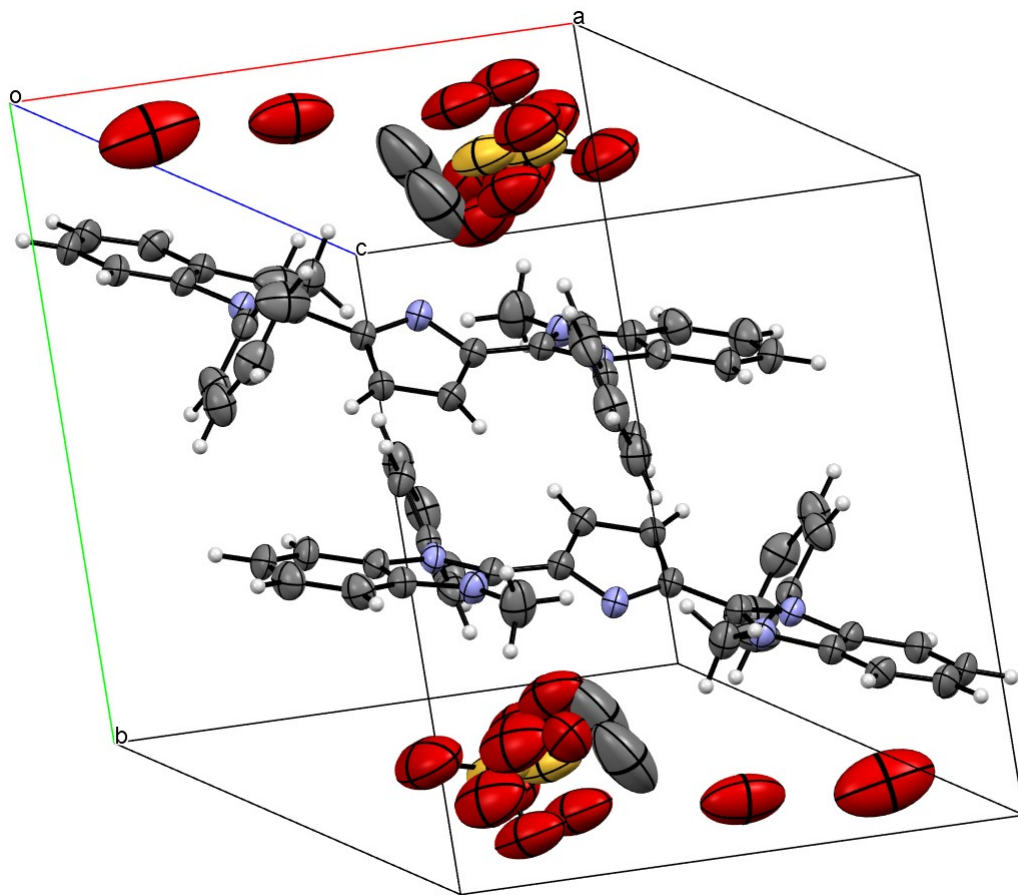

**Figure S34.** Crystal packing of Compound **4a** in unit cell

## CheckCIF report of compound 4a crystal structure

### Datablock: ex-nipphe\_autored

---

|                    |                                                     |                                                     |                 |
|--------------------|-----------------------------------------------------|-----------------------------------------------------|-----------------|
| Bond precision:    | C-C = 0.0057 A                                      | Wavelength=0.71073                                  |                 |
| Cell:              | a=11.0277(5)                                        | b=12.5158(4)                                        | c=13.0402(5)    |
|                    | alpha=72.121(4)                                     | beta=65.597(4)                                      | gamma=88.754(3) |
| Temperature:       | 222 K                                               |                                                     |                 |
| Volume             | Calculated                                          | Reported                                            |                 |
|                    | 1548.36(13)                                         | 1548.36(13)                                         |                 |
| Space group        | P -1                                                | P -1                                                |                 |
| Hall group         | -P 1                                                | -P 1                                                |                 |
| Moiety formula     | C32 H26 N5, 0.3(C O4 S), 0.7(O4 S),<br>3(O), 0.7(C) | C32 H26 N5, 0.3(C O4 S), 0.7(O4 S),<br>3(O), 0.7(C) |                 |
| Sum formula        | C33 H26 N5 O7 S                                     | C33 H26 N5 O7 S                                     |                 |
| Mr                 | 636.65                                              | 636.65                                              |                 |
| Dx, g cm-3         | 1.366                                               | 1.366                                               |                 |
| Z                  | 2                                                   | 2                                                   |                 |
| Mu (mm-1)          | 0.162                                               | 0.162                                               |                 |
| F000               | 662.0                                               | 662.7                                               |                 |
| F000'              | 662.56                                              |                                                     |                 |
| h,k,lmax           | 14,16,16                                            | 14,15,16                                            |                 |
| Nref               | 6824                                                | 6459                                                |                 |
| Tmin,Tmax          | 0.998,0.998                                         |                                                     |                 |
| Tmin'              | 0.997                                               |                                                     |                 |
| Correction method= | Not given                                           |                                                     |                 |
| Data completeness= | 0.947                                               | Theta(max)=                                         | 27.090          |
| R(reflections)=    | 0.1043( 4074)                                       | wR2(reflections)=                                   | 0.3471( 6459)   |
| S =                | 1.246                                               | Npar=                                               | 435             |

---

The following ALERTS were generated. Each ALERT has the format

**test-name\_ALERT\_alert-type\_alert-level.**

Click on the hyperlinks for more details of the test.

---

#### ●Alert level B

PLAT306\_ALERT\_2\_B Isolated Oxygen Atom (H-atoms Missing ?) ..... O5 Check

**Author Response: Hydrogen atoms of the solvent water were not located hence refined with**

**And 2 other PLAT306 Alerts**

More ...

PLAT430\_ALERT\_2\_B Short Inter D...A Contact O4A ..05 . 2.74 Ang.  
 x,y,z = 1\_555 Check

**Author Response: Disordered in the Oxygen atoms of the CH3O4S ion**

PLAT430\_ALERT\_2\_B Short Inter D...A Contact O5 ..05 . 2.71 Ang.  
 1-x,-y,1-z = 2\_656 Check

PLAT430\_ALERT\_2\_B Short Inter D...A Contact O5 ..N3 . 2.84 Ang.  
 1-x,-y,1-z = 2\_656 Check

**And 2 other PLAT430 Alerts**

More ...

1-x,-y,-z = 2\_655 Check  
 PLAT430\_ALERT\_2\_B Short Inter D...A Contact O7 ..07 . 2.67 Ang.  
 1-x,-y,-z = 2\_655 Check

**Alert level C**

PLAT084\_ALERT\_3\_C High wR2 Value (i.e. > 0.25) ..... 0.35 Report  
 PLAT241\_ALERT\_2\_C High 'MainMol' Ueq as Compared to Neighbors of C22 Check  
 PLAT250\_ALERT\_2\_C Large U3/U1 Ratio for <U(i,j)> Tensor(Resd 2) 2.2 Note  
 PLAT260\_ALERT\_2\_C Large Average Ueq of Residue Including S1B 0.160 Check

**And 5 other PLAT260 Alerts**

More ...

PLAT340\_ALERT\_3\_C Low Bond Precision on C-C Bonds ..... 0.00572 Ang.  
 PLAT430\_ALERT\_2\_C Short Inter D...A Contact O3A ..06 . 2.89 Ang.  
 x,y,z = 1\_555 Check

**Author Response: Disordered in the Oxygen atoms of the CH3O4S ion**

PLAT906\_ALERT\_3\_C Large K Value in the Analysis of Variance ..... 4.967 Check

PLAT910\_ALERT\_3\_C Missing # of FCF Reflection(s) Below Theta(Min). 10 Note  
 1 0 0, -1 1 0, 0 1 0, 1 1 0, 0 -1 1, 1 -1 1,  
 0 0 1, 1 0 1, 0 1 1, 1 1 1,

PLAT911\_ALERT\_3\_C Missing FCF Refl Between Thmin & STh/L= 0.600 7 Report  
 2 0 0, -2 -1 1, -2 0 1, 3 0 1, -1 1 1, -1 2 1,  
 5 13 9,

PLAT918\_ALERT\_3\_C Reflection(s) with I(obs) much Smaller I(calc) . 1 Check

PLAT976\_ALERT\_2\_C Check Calcd Resid. Dens. 0.68Ang From O5 . -0.48 eA-3

**And 2 other PLAT976 Alerts**

More ...

**Alert level G**

PLAT003\_ALERT\_2\_G Number of Uiso or U(i,j) Restrained non-H Atoms 12 Report  
 PLAT068\_ALERT\_1\_G Reported F000 Differs from Calcd (or Missing)... Please Check  
 PLAT072\_ALERT\_2\_G SHELXL First Parameter in WGHT Unusually Large 0.20 Report  
 PLAT073\_ALERT\_1\_G H-atoms ref, but \_hydrogen\_treatment Reported as constr Check  
 PLAT171\_ALERT\_4\_G The CIF-Embedded .res File Contains EADP Records 7 Report  
 PLAT186\_ALERT\_4\_G The CIF-Embedded .res File Contains ISOR Records 1 Report  
 PLAT187\_ALERT\_4\_G The CIF-Embedded .res File Contains RIGU Records 2 Report  
 PLAT190\_ALERT\_3\_G A Non-default RIGU Restraint Value for First Par 0.0030 Report

**And 3 other PLAT190 Alerts**

More ...

PLAT300\_ALERT\_4\_G Atom Site Occupancy of S1B Constrained at 0.3 Check

**And 11 other PLAT300 Alerts**

More ...

PLAT302\_ALERT\_4\_G Anion/Solvent/Minor-Residue Disorder (Resd 2) 100% Note

**And 2 other PLAT302 Alerts**

More ...

PLAT304\_ALERT\_4\_G Non-Integer Number of Atoms in ..... (Resd 2) 1.80 Check

**And 2 other PLAT304 Alerts**

More ...

PLAT395\_ALERT\_2\_G Deviating X-O-Y Angle From 120 for O1B . 71.8 Degree

**And 2 other PLAT395 Alerts**

More ...

PLAT432\_ALERT\_2\_G Short Inter X...Y Contact O5 ..C33A . 2.76 Ang.  
 x,y,z = 1\_555 Check



**And 2 other PLAT432 Alerts**

More ...

1-x,-y,1-z = 2\_656 Check  
PLAT769\_ALERT\_4\_G CIF Embedded Explicitly Supplied Scattering Data Please Note  
PLAT779\_ALERT\_4\_G Suspect or Irrelevant (Bond) Angle(s) in CIF ... 41.00 Deg.  
C33B -S1B -O1B 1\_555 1\_555 1\_555 ..... # 126 Check  
PLAT779\_ALERT\_4\_G Suspect or Irrelevant (Bond) Angle(s) in CIF ... 38.80 Deg.  
O3B -O2B -S1B 1\_555 1\_555 1\_555 ..... # 132 Check  
PLAT802\_ALERT\_4\_G CIF Input Record(s) with more than 80 Characters 1 Info  
PLAT860\_ALERT\_3\_G Number of Least-Squares Restraints ..... 66 Note  
PLAT912\_ALERT\_4\_G Missing # of FCF Reflections Above STh/L= 0.600 342 Note  
PLAT933\_ALERT\_2\_G Number of HKL-OMIT Records in Embedded .res File 6 Note  
-2 -1 1, -2 0 1, -1 1 1, -1 2 1, 2 0 0, 3 0 1,  
PLAT969\_ALERT\_5\_G The 'Henn et al.' R-Factor-gap value ..... 5.592 Note  
Predicted wR2: Based on SigI\*\*2 6.21 or SHELX Weight 27.86  
PLAT978\_ALERT\_2\_G Number C-C Bonds with Positive Residual Density. 0 Info  
PLAT983\_ALERT\_1\_G The S-f"= 0.1245 Deviates from IT-Value = 0.1234 Check

---

0 **ALERT level A** = Most likely a serious problem - resolve or explain  
9 **ALERT level B** = A potentially serious problem, consider carefully  
18 **ALERT level C** = Check. Ensure it is not caused by an omission or oversight  
45 **ALERT level G** = General information/check it is not something unexpected

3 ALERT type 1 CIF construction/syntax error, inconsistent or missing data  
31 ALERT type 2 Indicator that the structure model may be wrong or deficient  
11 ALERT type 3 Indicator that the structure quality may be low  
26 ALERT type 4 Improvement, methodology, query or suggestion  
1 ALERT type 5 Informative message, check

---

---

### Ellipsoid plot from CheckCIF report of compound 4a crystal structure

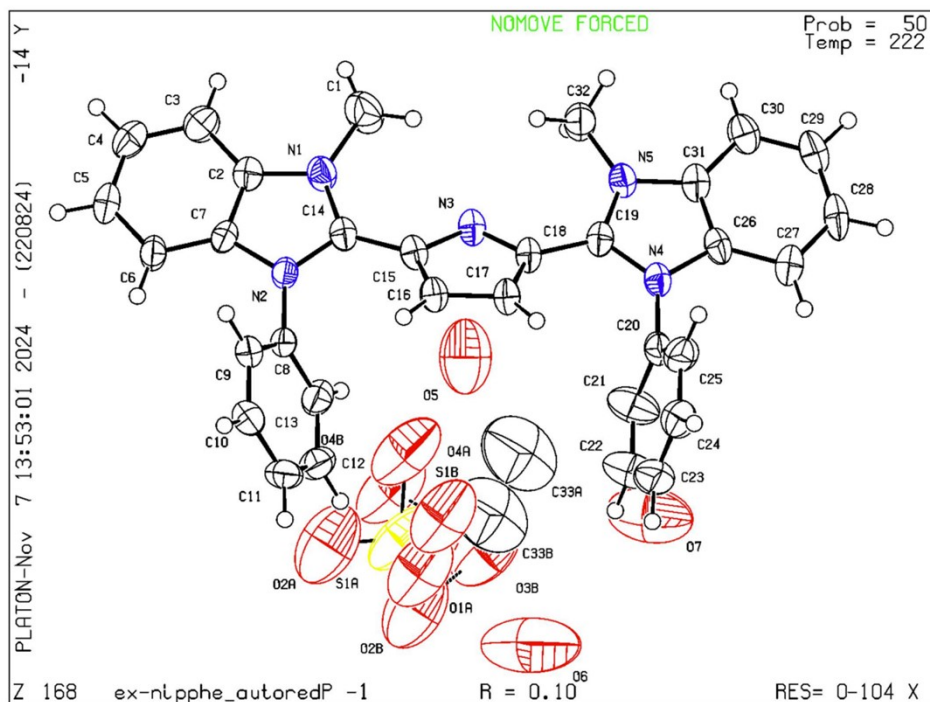

**Table S9.** The comparison of geometric parameters from SCXRD with optimization done using M06-2X/def2tzvpp and B3LYP/6-31+G(d) level of theory.

| Geometric Parameters |                | M06-2X/def2tzvpp | B3LYP/6-31+G(d) | X-Ray Structure |
|----------------------|----------------|------------------|-----------------|-----------------|
| Bond Lengths (Å)     | N3-C15         | 1.348            | 1.361           | 1.375           |
|                      | N3-C18         | 1.348            | 1.361           | 1.358           |
|                      | C-15-C16       | 1.418            | 1.428           | 1.399           |
|                      | C-17-C18       | 1.418            | 1.428           | 1.417           |
|                      | C-18-C19       | 1.434            | 1.439           | 1.441           |
|                      | C14-C15        | 1.434            | 1.439           | 1.433           |
| Bond Angles (°)      | C18-N3-C15     | 104.96           | 105.25          | 104.70          |
|                      | C19-C18-N3     | 119.92           | 120.56          | 121.52          |
|                      | C14-C15-N3     | 119.92           | 120.56          | 121.25          |
|                      | C17-C18-N3     | 111.91           | 111.51          | 111.38          |
|                      | C16-C15-N3     | 111.91           | 111.51          | 111.60          |
| Dihedral angles (°)  | N5-C19-C18-N3  | -21.92           | -23.96          | 25.64           |
|                      | N1-C14-C15-N3  | -21.92           | -23.95          | -29.63          |
|                      | N5-C19-C18-C17 | 157.45           | 154.62          | -151.22         |
|                      | N1-C14-C15-C16 | 157.45           | 154.62          | 148.66          |

## Computational details

Density functional theory (DFT) calculations were carried out using Gaussian16 suite of programs.<sup>19</sup> All the geometry optimizations were performed by using the M06-2X/def2tzvpp level of theory. Au atom was modelled using LANL2DZ basis set using effective core potentials. Sum of electronic and zero-point energies were used for calculating the singlet-triplet energy gap. All the minima are characterized by zero negative frequencies. NICS (in ppm) and NMR calculations was calculated at the GIAO/M06-2X/def2tzvpp level of theory while the anisotropy of the induced current density (ACID) was calculated at the CGST/M06-2X/def2tzvpp level of theory for all the compounds. The proton affinity values are obtained using equation 1.

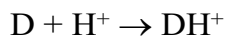

$$PA = -(E_{DH^+} - E_D - 0.01) \quad \dots\dots\dots \text{Equation 1}$$

Where  $E_D$  and  $E_{DH^+}$  are the enthalpy values of a parent compound and protonated compound, respectively.

The gas phase hydride ion affinity at 298.15 K was obtained using equation 2.

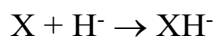

$$A_{HI} = -(E_{XH^-} - E_{X^+} - E_{H^-}) \quad \dots\dots \text{Equation 2}$$

Where  $E_{X^+}$  and  $E_{XH^-}$  are the energy values of a parent compound and its complex with hydride ion, respectively.

Complexation energies with Lewis acids like  $BH_3$  and  $AuCl$  was calculated using equation 3 and 4.

$$\Delta E_{BH_3} = E_{\text{complex}} - (E_{\text{Mol}} + E_{BH_3}) \quad \dots\dots\dots \text{Equation 3}$$

$$\Delta E_{AuCl} = E_{\text{complex}} - (E_{\text{Mol}} + E_{AuCl}) \quad \dots\dots\dots \text{Equation 4}$$

Where  $\Delta E$  is the energy of complexation and  $E_{\text{Mol}}$  is the absolute Gibbs free energy of a given molecule.

Energy Decomposition Analysis (EDA)<sup>20-24</sup> is a state-of-the-art electronic structure method that is being used to understand and study the nature of chemical bonds throughout the

periodic table. Originally reported and developed by Kitaura and Morokuma<sup>25</sup> and by Ziegler and Rauk<sup>26</sup> independently, EDA calculates the  $\Delta E_{\text{int}}$  (instantaneous interaction energy) using equation 1. All these energies are calculated between the defined fragments in the keeping them in the geometry as in the molecule.

$$\Delta E_{\text{int}} = \Delta E_{\text{elstat}} + \Delta E_{\text{pauli}} + \Delta E_{\text{orb}} \quad \dots\dots\text{eq. 1}$$

$\Delta E_{\text{elstat}}$  is an attractive term that comes because of the electrostatic (coulombic) interactions between the unperturbed charge densities of the fragments in their frozen geometry of the molecule.  $\Delta E_{\text{pauli}}$  is a repulsive term that calculates the increase in the energy because of repulsive interactions due to the electrons with the same spin.  $\Delta E_{\text{orb}}$  is the stabilizing energy that comes from the overlap of orbitals of fragments in frozen geometry of the molecule.  $\Delta E_{\text{orb}}$  can be decomposed into various contributions from the different natural orbitals for chemical valance and can be studied using EDA-NOCV developed by Mitoraj and Michalak.<sup>27-31</sup> All EDA calculations were performed at BP86/TZ2P level of theory using ADF-2020.102 program package.<sup>32, 33</sup>

To perform the EDA analysis, a model compound **4g** was prepared by substituting the nitrogen centres at benzimidazole rings with hydrogen atoms. The compound was optimized in c2v symmetry to overcome the convergence problems. Please note that the molecule remains planar (as in c2v symmetry) even if no symmetry constraints were enforced for optimization. Also, the structure optimized in c2v symmetry and the structure optimized without any symmetry constraints are same in energy. In compound **4a** and **4b**, it is because of the sterics imposed by the -Me or -Ph substituents at the benzimidazole ring, that we see a twist or change in the dihedral between two benzimidazole rings. The optimization of compound **4g** was performed at M062X/def2TZVPP level.

**Scheme S8.** Donor-Acceptor and Electron sharing bonding situations considered in this work.

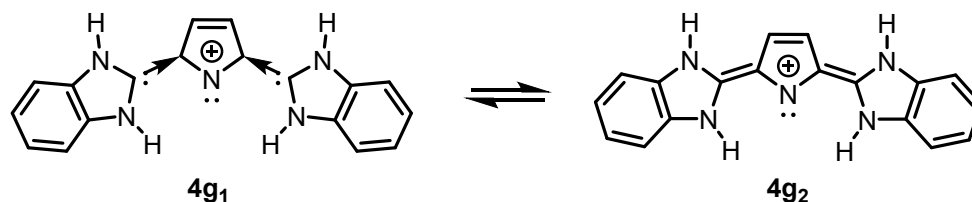

**Scheme S9.** Fragmentation of compound model compound **4g** for EDA analysis.

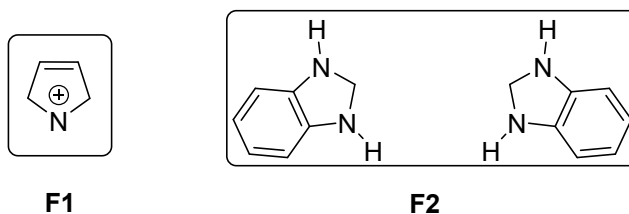

**Table S10.** EDA-NOCV results of the best possible bonding representation of model compound **4g** at the BP86/TZ2P level of theory. Energies are in kcal/mol. The corresponding deformation density plots are given in Scheme S8.

|                            | <b>4g<sub>1</sub></b> | <b>4g<sub>2</sub></b> |
|----------------------------|-----------------------|-----------------------|
| $\Delta E_{\text{int}}$    | -365.37               | -500.89               |
| $\Delta E_{\text{pauli}}$  | 717.77                | 517.76                |
| $\Delta E_{\text{elstat}}$ | -425.07               | -321.81               |
| $\Delta E_{\text{orb}}$    | -658.07               | -696.85               |

Values in italics give the percentage contribution to the total interaction energy.

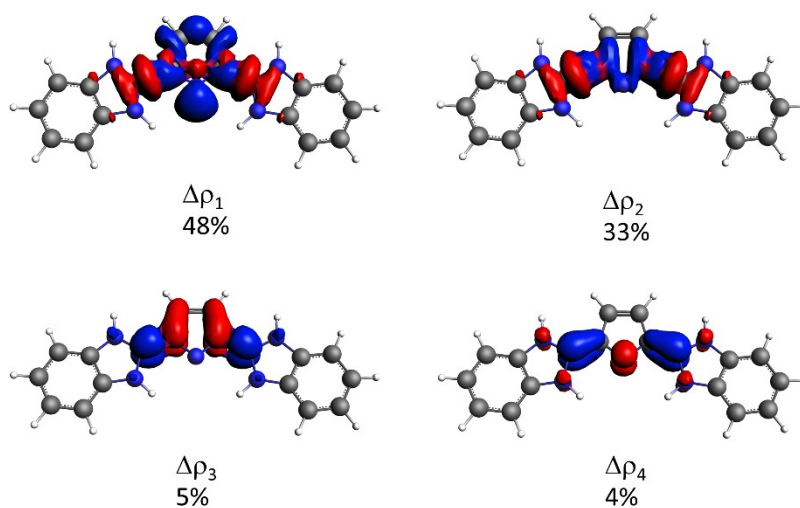

**Figure S35.** The plots for deformation densities for **4g<sub>1</sub>** along-with their percentage contribution to the total orbital interaction energy (isosurface value = 0.001).

## List of Coordinates of all the optimized geometries at m06-2x/def2tzvpp level of theory

### Compound 4a (Singlet)

Absolute Energy = -1508.149868 a.u.

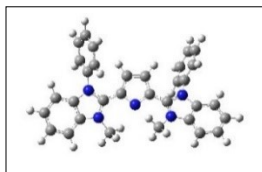

|     |             |             |             |
|-----|-------------|-------------|-------------|
| 1 1 |             |             |             |
| C   | 1.06385500  | 0.02034200  | -0.11053000 |
| C   | 0.68505700  | -1.34583800 | -0.06436100 |
| C   | -0.68506800 | -1.34583600 | 0.06437700  |
| C   | -1.06386300 | 0.02034400  | 0.11055000  |
| C   | -2.37996800 | 0.57049600  | 0.26515300  |
| C   | -4.60719500 | 0.78337500  | 0.26521100  |
| C   | -4.05423200 | 1.97434900  | 0.72379800  |
| N   | -2.67489500 | 1.80303100  | 0.72192400  |
| N   | -3.54105300 | -0.06436300 | -0.01480400 |
| C   | -1.74024500 | 2.79793000  | 1.22469600  |
| H   | -0.91837300 | 2.29895600  | 1.72485300  |
| H   | -1.34301300 | 3.39427100  | 0.40631900  |
| H   | -2.27717600 | 3.43318700  | 1.92363600  |
| C   | 2.37995800  | 0.57049800  | -0.26513600 |
| C   | 4.05420500  | 1.97436700  | -0.72380000 |
| C   | 4.60718300  | 0.78339500  | -0.26522700 |
| N   | 3.54105200  | -0.06435200 | 0.01480500  |
| N   | 2.67486900  | 1.80303900  | -0.72190100 |
| C   | 1.74019500  | 2.79793200  | -1.22464200 |
| H   | 1.34292700  | 3.39421900  | -0.40624400 |
| H   | 2.27711800  | 3.43324000  | -1.92354300 |
| H   | 0.91834900  | 2.29895600  | -1.72483900 |
| N   | -0.00000500 | 0.84164800  | -0.00000500 |
| H   | 1.32489100  | -2.20916000 | -0.13063100 |
| H   | -1.32490600 | -2.20915600 | 0.13064900  |
| C   | 5.97629700  | 0.60778100  | -0.13449500 |
| C   | 4.85314400  | 3.05196000  | -1.08090100 |
| C   | 6.22122700  | 2.87955100  | -0.95982100 |
| C   | 6.77326100  | 1.68058100  | -0.49334100 |
| H   | 6.39253700  | -0.31959400 | 0.23244300  |
| H   | 7.84692800  | 1.59264600  | -0.40885200 |
| H   | 6.87979800  | 3.69346500  | -1.22728200 |
| H   | 4.43558700  | 3.98547500  | -1.42894200 |
| C   | -4.85318400 | 3.05193700  | 1.08089000  |
| C   | -5.97630600 | 0.60775400  | 0.13445500  |
| C   | -6.77328300 | 1.68054800  | 0.49329300  |
| C   | -6.22126300 | 2.87952000  | 0.95978600  |
| H   | -4.43563700 | 3.98545200  | 1.42894200  |
| H   | -6.87984500 | 3.69342800  | 1.22723900  |

|   |             |             |             |
|---|-------------|-------------|-------------|
| H | -7.84694700 | 1.59260700  | 0.40878500  |
| H | -6.39253400 | -0.31962200 | -0.23249200 |
| C | -3.69742200 | -1.36376800 | -0.59659800 |
| C | -3.31660100 | -1.57309100 | -1.91258100 |
| C | -4.25060100 | -2.37780000 | 0.16902300  |
| C | -3.47733900 | -2.83404100 | -2.46516700 |
| H | -2.88955400 | -0.76049800 | -2.48445600 |
| C | -4.41479400 | -3.63463400 | -0.39601400 |
| H | -4.53806800 | -2.18207900 | 1.19368300  |
| C | -4.02425400 | -3.86268500 | -1.70842000 |
| H | -3.17954500 | -3.01206900 | -3.48886000 |
| H | -4.84335700 | -4.43453100 | 0.19126600  |
| H | -4.15034200 | -4.84373400 | -2.14479000 |
| C | 3.69744400  | -1.36375300 | 0.59660000  |
| C | 4.25060400  | -2.37778600 | -0.16903300 |
| C | 3.31666600  | -1.57307200 | 1.91259600  |
| C | 4.41482000  | -3.63461700 | 0.39600400  |
| H | 4.53803900  | -2.18206900 | -1.19370400 |
| C | 3.47742600  | -2.83401900 | 2.46518300  |
| H | 2.88963300  | -0.76047800 | 2.48448100  |
| C | 4.02432100  | -3.86266400 | 1.70842300  |
| H | 4.84336800  | -4.43451500 | -0.19128600 |
| H | 3.17966500  | -3.01204400 | 3.48888500  |
| H | 4.15042600  | -4.84371100 | 2.14479300  |

### Compound 4a (Triplet)

Absolute Energy = -1508.055979 a.u.

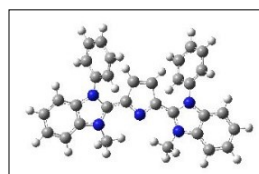

|     |             |             |             |
|-----|-------------|-------------|-------------|
| 1 3 |             |             |             |
| C   | -1.08443900 | 0.17256600  | 0.05980900  |
| C   | -0.66763600 | -1.24533600 | 0.03003400  |
| C   | 0.66763800  | -1.24533700 | -0.02998600 |
| C   | 1.08444100  | 0.17256300  | -0.05978300 |
| C   | 2.39353300  | 0.65070700  | -0.18050700 |
| C   | 4.64608500  | 0.70297200  | -0.27582000 |
| C   | 4.15750200  | 1.97665300  | -0.58803500 |
| N   | 2.78617700  | 1.92856700  | -0.51243800 |
| N   | 3.54987200  | -0.09708100 | -0.02702900 |
| C   | 1.96331200  | 3.06044400  | -0.90546700 |
| H   | 0.92202900  | 2.76805700  | -0.88411600 |
| H   | 2.13350600  | 3.88532400  | -0.21321400 |
| H   | 2.24974600  | 3.37332900  | -1.90950200 |

|   |             |             |             |
|---|-------------|-------------|-------------|
| C | -2.39353500 | 0.65070900  | 0.18052100  |
| C | -4.15751900 | 1.97664200  | 0.58803200  |
| C | -4.64608900 | 0.70295500  | 0.27581900  |
| N | -3.54986800 | -0.09708600 | 0.02703100  |
| N | -2.78619300 | 1.92856900  | 0.51244400  |
| C | -1.96334900 | 3.06045800  | 0.90548000  |
| H | -2.13354300 | 3.88533300  | 0.21322100  |
| H | -2.24980400 | 3.37334500  | 1.90950800  |
| H | -0.92206200 | 2.76808800  | 0.88414800  |
| N | 0.00000200  | 0.99486400  | 0.00000900  |
| H | -1.30988900 | -2.10755100 | 0.07286600  |
| H | 1.30989100  | -2.10755300 | -0.07280500 |
| C | -6.00793400 | 0.43763700  | 0.22576500  |
| C | -5.01309900 | 3.02650200  | 0.89904800  |
| C | -6.37074000 | 2.75651900  | 0.86629400  |
| C | -6.85855900 | 1.48723300  | 0.52961400  |
| H | -6.38124300 | -0.54102100 | -0.03905300 |
| H | -7.92649000 | 1.32378000  | 0.50607500  |
| H | -7.07199400 | 3.54480300  | 1.09987900  |
| H | -4.63773100 | 4.00880200  | 1.14708600  |
| C | 5.01307100  | 3.02652100  | -0.89905800 |
| C | 6.00793200  | 0.43766600  | -0.22577200 |
| C | 6.85854700  | 1.48726900  | -0.52962900 |
| C | 6.37071500  | 2.75654900  | -0.86631000 |
| H | 4.63769300  | 4.00881600  | -1.14709600 |
| H | 7.07196000  | 3.54483900  | -1.09990100 |
| H | 7.92647900  | 1.32382600  | -0.50609600 |
| H | 6.38125200  | -0.54098800 | 0.03904500  |
| C | 3.65202300  | -1.39512700 | 0.55561700  |
| C | 3.21656700  | -1.59989100 | 1.85797700  |
| C | 4.20770700  | -2.42616200 | -0.18733200 |
| C | 3.32358300  | -2.86455700 | 2.41450100  |
| H | 2.79536400  | -0.77552400 | 2.41820900  |
| C | 4.31954500  | -3.68668200 | 0.38259100  |
| H | 4.53553500  | -2.23913200 | -1.20141700 |
| C | 3.87350800  | -3.90705300 | 1.67859900  |
| H | 2.98469700  | -3.03430900 | 3.42689200  |
| H | 4.74933600  | -4.49682900 | -0.18972000 |
| H | 3.95840800  | -4.89106000 | 2.11808800  |
| C | -3.65200700 | -1.39513100 | -0.55562100 |
| C | -4.20767700 | -2.42617600 | 0.18732500  |
| C | -3.21655800 | -1.59988200 | -1.85798600 |
| C | -4.31950600 | -3.68669300 | -0.38260400 |
| H | -4.53550100 | -2.23915400 | 1.20141300  |
| C | -3.32356400 | -2.86454700 | -2.41451600 |
| H | -2.79536700 | -0.77550900 | -2.41821600 |
| C | -3.87347400 | -3.90705200 | -1.67861700 |
| H | -4.74928500 | -4.49684700 | 0.18970500  |
| H | -2.98468400 | -3.03428900 | -3.42691100 |
| H | -3.95836800 | -4.89105800 | -2.11811000 |

Compound 4a (Protonated)

Absolute Energy = -1508.435890 a.u.

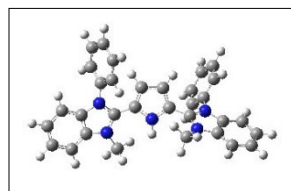

|     |             |             |             |
|-----|-------------|-------------|-------------|
| 2 1 |             |             |             |
| C   | -1.10078400 | -0.02730600 | 0.18474300  |
| C   | -0.69290800 | -1.34425300 | 0.10889400  |
| C   | 0.69288300  | -1.34426300 | -0.10906000 |
| C   | 1.10078700  | -0.02732100 | -0.18484800 |
| C   | 2.43316800  | 0.49952400  | -0.41086900 |
| C   | 4.64486900  | 0.70048800  | -0.35646800 |
| C   | 4.13421000  | 1.72295100  | -1.14995800 |
| N   | 2.75366400  | 1.55942100  | -1.16944200 |
| N   | 3.55444800  | -0.03783900 | 0.09102400  |
| C   | 1.86037700  | 2.35311800  | -2.00206900 |
| H   | 0.96726300  | 1.77762200  | -2.22749400 |
| H   | 1.60298600  | 3.28901100  | -1.50739200 |
| H   | 2.37243500  | 2.57640000  | -2.93457900 |
| C   | -2.43315000 | 0.49954900  | 0.41082600  |
| C   | -4.13416600 | 1.72298700  | 1.14996000  |
| C   | -4.64485300 | 0.70052100  | 0.35649300  |
| N   | -3.55444900 | -0.03782100 | -0.09101700 |
| N   | -2.75362000 | 1.55944300  | 1.16941600  |
| C   | -1.86031300 | 2.35313300  | 2.00202700  |
| H   | -1.60291800 | 3.28902100  | 1.50734200  |
| H   | -2.37235700 | 2.57642800  | 2.93454200  |
| H   | -0.96720400 | 1.77762800  | 2.22744800  |
| N   | -0.00000400 | 0.76902800  | -0.00011500 |
| H   | -1.33022200 | -2.20660400 | 0.20621000  |
| H   | 1.33018500  | -2.20662300 | -0.20637800 |
| C   | -6.00719800 | 0.56167200  | 0.11658900  |
| C   | -4.96023000 | 2.66274100  | 1.75772100  |
| C   | -6.31363500 | 2.52318300  | 1.52657300  |
| C   | -6.82739200 | 1.49319600  | 0.71895000  |
| H   | -6.39492000 | -0.23013600 | -0.50826300 |
| H   | -7.89547500 | 1.43281900  | 0.56615400  |
| H   | -6.99966400 | 3.22715100  | 1.97560600  |
| H   | -4.57229100 | 3.46302700  | 2.37149800  |
| C   | 4.96029700  | 2.66269200  | -1.75770700 |
| C   | 6.00720700  | 0.56163100  | -0.11652800 |
| C   | 6.82742300  | 1.49314300  | -0.71887700 |
| C   | 6.31369500  | 2.52312700  | -1.52652200 |
| H   | 4.57238000  | 3.46297700  | -2.37149900 |
| H   | 6.99974000  | 3.22708600  | -1.97554200 |
| H   | 7.89550200  | 1.43276200  | -0.56605000 |
| H   | 6.39490700  | -0.23017200 | 0.50834300  |
| C   | 3.65546300  | -1.17555800 | 0.96794000  |
| C   | 3.21685400  | -1.06840500 | 2.27762500  |

|   |             |             |             |
|---|-------------|-------------|-------------|
| C | 4.22115200  | -2.34121300 | 0.47515800  |
| C | 3.33277100  | -2.17077000 | 3.11121800  |
| H | 2.80455800  | -0.13544500 | 2.63864300  |
| C | 4.33658700  | -3.43514600 | 1.32116600  |
| H | 4.56417700  | -2.38845000 | -0.55041300 |
| C | 3.88959300  | -3.35026700 | 2.63337300  |
| H | 3.00120500  | -2.10396900 | 4.13776700  |
| H | 4.77760500  | -4.35126300 | 0.95447700  |
| H | 3.98480200  | -4.20401500 | 3.28957400  |
| C | -3.65549200 | -1.17555300 | -0.96791200 |
| C | -4.22117100 | -2.34120000 | -0.47509800 |
| C | -3.21691700 | -1.06842000 | -2.27761000 |
| C | -4.33663500 | -3.43514300 | -1.32108800 |
| H | -4.56416900 | -2.38842000 | 0.55048300  |
| C | -3.33286300 | -2.17079600 | -3.11118500 |
| H | -2.80462700 | -0.13546700 | -2.63865200 |
| C | -3.88967700 | -3.35028400 | -2.63331000 |
| H | -4.77764800 | -4.35125300 | -0.95437500 |
| H | -3.00132500 | -2.10401000 | -4.13774500 |
| H | -3.98490900 | -4.20404000 | -3.28949700 |
| H | -0.00000100 | 1.77573900  | -0.00014300 |

#### Compound 4a complex with AuCl

Absolute Energy = -2103.744950 a.u.

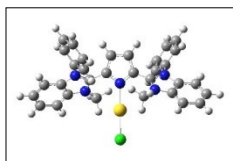

|     |             |             |             |
|-----|-------------|-------------|-------------|
| 1 1 |             |             |             |
| C   | 1.04958100  | 1.10992600  | 0.26647200  |
| C   | 0.67846400  | 2.44833700  | 0.16068200  |
| C   | -0.67858900 | 2.44831600  | -0.16061800 |
| C   | -1.04965100 | 1.10989400  | -0.26649400 |
| C   | -2.36477400 | 0.58246100  | -0.58318600 |
| C   | -4.56413700 | 0.24001200  | -0.50142300 |
| C   | -4.03844400 | -0.50953300 | -1.54913400 |
| N   | -2.67404300 | -0.26079400 | -1.57548900 |
| N   | -3.48949700 | 0.90554300  | 0.07986900  |
| C   | -1.78152600 | -0.77536700 | -2.60448100 |
| H   | -0.83209200 | -0.25365100 | -2.53786200 |
| H   | -1.62183300 | -1.84257600 | -2.45676900 |
| H   | -2.23821400 | -0.59354000 | -3.57548300 |
| C   | 2.36471800  | 0.58251300  | 0.58315000  |
| C   | 4.03836700  | -0.50957800 | 1.54901800  |
| C   | 4.56407200  | 0.24003000  | 0.50135800  |
| N   | 3.48944500  | 0.90563400  | -0.07987700 |
| N   | 2.67397200  | -0.26081000 | 1.57539400  |
| C   | 1.78143100  | -0.77545800 | 2.60432500  |

|    |             |             |             |
|----|-------------|-------------|-------------|
| H  | 1.62179100  | -1.84266300 | 2.45653200  |
| H  | 2.23805500  | -0.59366800 | 3.57536500  |
| H  | 0.83197600  | -0.25378300 | 2.53768600  |
| N  | -0.00002000 | 0.29163200  | -0.00001800 |
| H  | 1.31795100  | 3.30282300  | 0.30697900  |
| H  | -1.31811500 | 3.30278200  | -0.30685900 |
| C  | 5.91591900  | 0.20935200  | 0.18356100  |
| C  | 4.83848900  | -1.32066500 | 2.34439500  |
| C  | 6.18472100  | -1.34488000 | 2.03707400  |
| C  | 6.71272400  | -0.59600700 | 0.97388500  |
| H  | 6.31613400  | 0.77931500  | -0.64248100 |
| H  | 7.77133800  | -0.65644100 | 0.76552600  |
| H  | 6.84874300  | -1.96284700 | 2.62428200  |
| H  | 4.42893300  | -1.91103800 | 3.15141800  |
| C  | -4.83858500 | -1.32054300 | -2.34457100 |
| C  | -5.91598600 | 0.20934600  | -0.18363500 |
| C  | -6.71280900 | -0.59593700 | -0.97401800 |
| C  | -6.18482000 | -1.34474700 | -2.03725800 |
| H  | -4.42904200 | -1.91087300 | -3.15163200 |
| H  | -6.84885500 | -1.96265700 | -2.62451300 |
| H  | -7.77142500 | -0.65636100 | -0.76566600 |
| H  | -6.31618900 | 0.77926100  | 0.64244700  |
| C  | -3.56797100 | 1.71175500  | 1.26255200  |
| C  | -2.87757500 | 1.31829000  | 2.39848700  |
| C  | -4.35387500 | 2.85249700  | 1.24580400  |
| C  | -2.97147200 | 2.09715900  | 3.54078400  |
| H  | -2.28320200 | 0.41379000  | 2.37840300  |
| C  | -4.44670200 | 3.61968600  | 2.39837200  |
| H  | -4.87748800 | 3.13522200  | 0.34189700  |
| C  | -3.75469900 | 3.24445300  | 3.54133000  |
| H  | -2.44137700 | 1.80216600  | 4.43542100  |
| H  | -5.05650100 | 4.51210900  | 2.39970800  |
| H  | -3.82908300 | 3.84510400  | 4.43701800  |
| C  | 3.56792800  | 1.71192200  | -1.26250700 |
| C  | 4.35385700  | 2.85264600  | -1.24568700 |
| C  | 2.87752100  | 1.31854400  | -2.39846500 |
| C  | 4.44670000  | 3.61990700  | -2.39820800 |
| H  | 4.87747800  | 3.13530100  | -0.34176400 |
| C  | 2.97143500  | 2.09748400  | -3.54071300 |
| H  | 2.28313100  | 0.41405400  | -2.37843700 |
| C  | 3.75468800  | 3.24476100  | -3.54118800 |
| H  | 5.05652000  | 4.51231500  | -2.39948800 |
| H  | 2.44133300  | 1.80256000  | -4.43536800 |
| H  | 3.82908500  | 3.84546700  | -4.43683800 |
| Au | 0.00006800  | -1.79370300 | 0.00003600  |
| Cl | 0.00015000  | -4.06867700 | 0.00002900  |

#### Compound 4a + Hydride ion

Absolute Energy = -1508.859776 a.u.



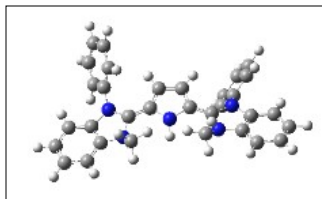

|     |             |             |             |
|-----|-------------|-------------|-------------|
| 0 1 |             |             |             |
| C   | -1.19095400 | -0.12607000 | -0.32652900 |
| C   | -0.70000000 | 1.22006400  | -0.47921900 |
| C   | 0.65067300  | 1.21270800  | -0.46604500 |
| C   | 1.11666800  | -0.14305800 | -0.28090500 |
| C   | 2.36000100  | -0.64463300 | -0.10419000 |
| C   | 4.53469200  | -0.79673700 | 0.57079000  |
| C   | 3.97163800  | -2.07815900 | 0.60709300  |
| N   | 2.64517000  | -2.00144800 | 0.18110000  |
| N   | 3.55608300  | 0.08012500  | 0.10289700  |
| C   | 2.13011600  | -3.08279600 | -0.64545300 |
| H   | 1.99192400  | -3.97846300 | -0.04081900 |
| H   | 1.17487500  | -2.78852500 | -1.06690200 |
| H   | 2.82507800  | -3.31176900 | -1.45915100 |
| C   | -2.46852200 | -0.58046700 | -0.28563600 |
| C   | -4.29453000 | -1.93216600 | -0.30208000 |
| C   | -4.74607300 | -0.62202300 | -0.11918600 |
| N   | -3.62202400 | 0.20493900  | -0.10692500 |
| N   | -2.90431200 | -1.91151200 | -0.36384900 |
| C   | -2.21965100 | -2.94242600 | -1.11827600 |
| H   | -2.40312900 | -3.91153300 | -0.65583900 |
| H   | -2.58366800 | -2.97019600 | -2.14944300 |
| H   | -1.15467600 | -2.74368300 | -1.12724500 |
| N   | -0.04313100 | -0.98263300 | -0.25416200 |
| H   | -1.31855700 | 2.09012300  | -0.62449300 |
| H   | 1.27984000  | 2.07766200  | -0.58165600 |
| C   | -6.08719400 | -0.34167800 | 0.03253000  |
| C   | -5.17779500 | -2.98578900 | -0.40531500 |
| C   | -6.54151400 | -2.70486700 | -0.27127900 |
| C   | -6.98379700 | -1.41280700 | -0.04427700 |
| H   | -6.43418200 | 0.66760000  | 0.20154200  |
| H   | -8.04179800 | -1.22131000 | 0.06825700  |
| H   | -7.25718500 | -3.51180100 | -0.34353300 |
| H   | -4.83077200 | -3.99586300 | -0.57242300 |
| C   | 4.72418900  | -3.17985900 | 0.95268900  |
| C   | 5.86131300  | -0.59432100 | 0.89400200  |
| C   | 6.61736000  | -1.70860700 | 1.27066700  |
| C   | 6.06322300  | -2.97660100 | 1.30051800  |
| H   | 4.29312800  | -4.17157800 | 0.95265100  |
| H   | 6.67119200  | -3.82289400 | 1.58804600  |
| H   | 7.65708000  | -1.57213000 | 1.53395700  |
| H   | 6.31021500  | 0.38651100  | 0.83736600  |
| C   | 3.84821600  | 1.35130300  | -0.43198200 |
| C   | 3.53344900  | 1.64887300  | -1.75652100 |
| C   | 4.47517600  | 2.30749900  | 0.36109800  |

|   |             |             |             |
|---|-------------|-------------|-------------|
| C | 3.84135900  | 2.89468100  | -2.27567100 |
| H | 3.03308900  | 0.90208300  | -2.35890600 |
| C | 4.79353400  | 3.54865500  | -0.17152000 |
| H | 4.69193100  | 2.07581900  | 1.39516400  |
| C | 4.47597300  | 3.84860100  | -1.48823200 |
| H | 3.59106100  | 3.12025600  | -3.30357000 |
| H | 5.27940800  | 4.28744400  | 0.45150000  |
| H | 4.71704800  | 4.81938400  | -1.89867200 |
| C | -3.65205600 | 1.50837800  | 0.44721700  |
| C | -4.40527600 | 2.49375500  | -0.17866400 |
| C | -2.96020700 | 1.79780500  | 1.61971900  |
| C | -4.47324200 | 3.76675900  | 0.37162400  |
| H | -4.92292900 | 2.25641400  | -1.09863500 |
| C | -3.02061900 | 3.07348900  | 2.15432700  |
| H | -2.36731700 | 1.02493900  | 2.08933600  |
| C | -3.77829700 | 4.06103400  | 1.53497300  |
| H | -5.06116500 | 4.53070500  | -0.11880700 |
| H | -2.47759800 | 3.29732600  | 3.06246400  |
| H | -3.82311200 | 5.05520500  | 1.95782700  |
| H | -0.04938400 | -1.60126100 | 0.55094800  |

#### Compound 4a (ASE)

Absolute Energy = -1509.310344 a.u.

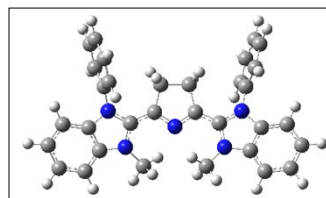

|     |             |             |             |
|-----|-------------|-------------|-------------|
| 1 1 |             |             |             |
| C   | -1.09024700 | 0.00631600  | -0.04585700 |
| C   | -0.75922000 | 1.47854400  | 0.12785200  |
| C   | 0.75925200  | 1.47854400  | -0.12787300 |
| C   | 1.09026800  | 0.00632000  | 0.04585900  |
| C   | 2.36535200  | -0.57520800 | 0.19510400  |
| C   | 4.59981600  | -0.81398100 | 0.30348900  |
| C   | 4.01530500  | -2.02931000 | 0.64879900  |
| N   | 2.63873200  | -1.85014400 | 0.58323800  |
| N   | 3.55827900  | 0.06582800  | 0.02650300  |
| C   | 1.67663600  | -2.85651500 | 0.98746500  |
| H   | 0.91388300  | -2.40353200 | 1.61378800  |
| H   | 1.19657500  | -3.30479800 | 0.11976300  |
| H   | 2.20780900  | -3.61923900 | 1.54907000  |
| C   | -2.36533600 | -0.57521300 | -0.19510200 |
| C   | -4.01530000 | -2.02931300 | -0.64879100 |
| C   | -4.59980600 | -0.81397800 | -0.30350400 |
| N   | -3.55826700 | 0.06582400  | -0.02650700 |
| N   | -2.63872600 | -1.85015000 | -0.58323600 |
| C   | -1.67664800 | -2.85653700 | -0.98746200 |

|   |             |             |             |
|---|-------------|-------------|-------------|
| H | -1.19655400 | -3.30478400 | -0.11976200 |
| H | -2.20784900 | -3.61928200 | -1.54901300 |
| H | -0.91391900 | -2.40358500 | -1.61383800 |
| N | 0.00001100  | -0.75390400 | 0.00000700  |
| H | -1.30176500 | 2.13573100  | -0.54766300 |
| H | 1.30180300  | 2.13574000  | 0.54762800  |
| C | -5.97292800 | -0.64415000 | -0.25501300 |
| C | -4.79067300 | -3.13241400 | -0.97245500 |
| C | -6.16700700 | -2.96542100 | -0.93670200 |
| C | -6.74834600 | -1.74581700 | -0.58241100 |
| H | -6.41286500 | 0.30166100  | 0.02784500  |
| H | -7.82521400 | -1.66002500 | -0.55913700 |
| H | -6.80429500 | -3.80261100 | -1.18304800 |
| H | -4.35368700 | -4.08531600 | -1.23288700 |
| C | 4.79067400  | -3.13241300 | 0.97246500  |
| C | 5.97293900  | -0.64416500 | 0.25497900  |
| C | 6.74835200  | -1.74583400 | 0.58238300  |
| C | 6.16700800  | -2.96543000 | 0.93669300  |
| H | 4.35368600  | -4.08531300 | 1.23290200  |
| H | 6.80429400  | -3.80262200 | 1.18303800  |
| H | 7.82522100  | -1.66004900 | 0.55909700  |
| H | 6.41288100  | 0.30164000  | -0.02789200 |
| C | 3.77285100  | 1.37000700  | -0.51916300 |
| C | 3.52758800  | 1.59668600  | -1.86491500 |
| C | 4.27489600  | 2.37107100  | 0.29904000  |
| C | 3.76247100  | 2.85769500  | -2.39265000 |
| H | 3.15459400  | 0.79076300  | -2.48360000 |
| C | 4.51471200  | 3.62720900  | -0.23858100 |
| H | 4.46713600  | 2.16244400  | 1.34333100  |
| C | 4.25389200  | 3.87127000  | -1.58057200 |
| H | 3.57048200  | 3.04547500  | -3.43981800 |
| H | 4.90295500  | 4.41510300  | 0.39155300  |
| H | 4.44066400  | 4.85174600  | -1.99599400 |
| C | -3.77285000 | 1.36999800  | 0.51916800  |
| C | -4.27484900 | 2.37107800  | -0.29904300 |
| C | -3.52766200 | 1.59665000  | 1.86493800  |
| C | -4.51467800 | 3.62721000  | 0.23858600  |
| H | -4.46703900 | 2.16246900  | -1.34334700 |
| C | -3.76256000 | 2.85765200  | 2.39268200  |
| H | -3.15470800 | 0.79071200  | 2.48362900  |
| C | -4.25392400 | 3.87124600  | 1.58059400  |
| H | -4.90288100 | 4.41511900  | -0.39155500 |
| H | -3.57062500 | 3.04541200  | 3.43986400  |
| H | -4.44070800 | 4.85171800  | 1.99602200  |
| H | 0.97996400  | 1.80621400  | -1.14576900 |
| H | -0.97993000 | 1.80623500  | 1.14574000  |

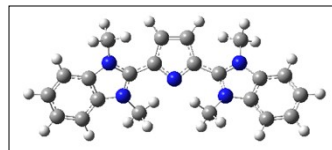

|     |             |             |             |
|-----|-------------|-------------|-------------|
| 1 1 |             |             |             |
| C   | -1.06872300 | 0.98860600  | -0.00577000 |
| C   | -0.69008900 | 2.35185200  | 0.00164700  |
| C   | 0.68995400  | 2.35187800  | -0.00084900 |
| C   | 1.06866600  | 0.98865900  | 0.00612300  |
| C   | 2.39775700  | 0.44202600  | 0.04049000  |
| C   | 4.59437200  | 0.19793000  | -0.24503900 |
| C   | 4.11344400  | -0.92456300 | 0.42343200  |
| N   | 2.74968100  | -0.73276600 | 0.59467300  |
| N   | 3.50012400  | 1.01877400  | -0.47814800 |
| C   | 1.88950600  | -1.64475300 | 1.33280900  |
| H   | 1.09564300  | -1.08080500 | 1.80829200  |
| H   | 1.44760400  | -2.37755500 | 0.66138200  |
| H   | 2.49784100  | -2.14365000 | 2.08264700  |
| C   | -2.39778100 | 0.44194100  | -0.04032700 |
| C   | -4.11332900 | -0.92482500 | -0.42326800 |
| C   | -4.59445700 | 0.19788700  | 0.24469300  |
| N   | -3.50031100 | 1.01887700  | 0.47776400  |
| N   | -2.74951200 | -0.73305400 | -0.59419800 |
| C   | -1.88900400 | -1.64514500 | -1.33185300 |
| H   | -1.44549300 | -2.37638800 | -0.65980800 |
| H   | -2.49754000 | -2.14584900 | -2.08030600 |
| H   | -1.09631200 | -1.08098100 | -1.80905600 |
| N   | -0.00001000 | 0.16680600  | 0.00004600  |
| H   | -1.33215100 | 3.21599000  | -0.02374400 |
| H   | 1.33200100  | 3.21602500  | 0.02484000  |
| C   | -5.93769200 | 0.33884800  | 0.56376500  |
| C   | -4.95346700 | -1.96468600 | -0.79694600 |
| C   | -6.29277000 | -1.82733000 | -0.47805600 |
| C   | -6.77646800 | -0.69597000 | 0.18992000  |
| H   | -6.31684500 | 1.21402800  | 1.07144500  |
| H   | -7.83071100 | -0.62888600 | 0.41718200  |
| H   | -6.98296200 | -2.61280000 | -0.75061700 |
| H   | -4.58489400 | -2.84323000 | -1.30628600 |
| C   | 4.95364700  | -1.96434700 | 0.79714300  |
| C   | 5.93748700  | 0.33872100  | -0.56466500 |
| C   | 6.77635300  | -0.69601700 | -0.19076700 |
| C   | 6.29285300  | -1.82713900 | 0.47774500  |
| H   | 4.58519700  | -2.84270600 | 1.30689700  |
| H   | 6.98310800  | -2.61255000 | 0.75031700  |
| H   | 7.83051500  | -0.62905300 | -0.41843800 |
| H   | 6.31649900  | 1.21371200  | -1.07277600 |
| C   | 3.55826100  | 2.24475700  | -1.25558100 |
| C   | -3.55856500 | 2.24493200  | 1.25511300  |
| H   | -2.61253500 | 2.38840400  | 1.76830300  |
| H   | -3.76431200 | 3.10083100  | 0.61445900  |
| H   | -4.35392000 | 2.14338400  | 1.98882400  |

**Compound 4b (Singlet)**

**Absolute Energy = -1124.779583 a.u.**

|   |            |            |             |
|---|------------|------------|-------------|
| H | 4.35298900 | 2.14287500 | -1.98993100 |
| H | 2.61189100 | 2.38859100 | -1.76803100 |
| H | 3.76485800 | 3.10057800 | -0.61509700 |

**Compound 4b (Triplet)**

**Absolute Energy = -1124.679427 a.u.**

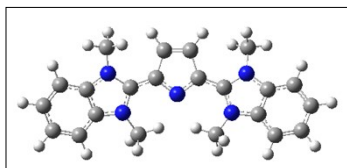

1 3

|   |             |             |             |
|---|-------------|-------------|-------------|
| C | -1.08845500 | 0.89250800  | 0.02563600  |
| C | -0.66785800 | 2.30852100  | 0.02325500  |
| C | 0.66797800  | 2.30845300  | -0.02284100 |
| C | 1.08838800  | 0.89239600  | -0.02599000 |
| C | 2.39956400  | 0.40820100  | 0.00268200  |
| C | 4.64142400  | 0.30594600  | -0.13294700 |
| C | 4.16082500  | -0.96049200 | 0.22668200  |
| N | 2.79371100  | -0.88005100 | 0.29765400  |
| N | 3.54822100  | 1.12647100  | -0.27454100 |
| C | 1.99218300  | -1.99128200 | 0.78487600  |
| H | 0.96522800  | -1.67042800 | 0.89485900  |
| H | 2.04878600  | -2.81471900 | 0.07264600  |
| H | 2.39403300  | -2.31995200 | 1.74308800  |
| C | -2.39961800 | 0.40842200  | -0.00306600 |
| C | -4.16082400 | -0.96041900 | -0.22677500 |
| C | -4.64145700 | 0.30601300  | 0.13295300  |
| N | -3.54832100 | 1.12664100  | 0.27425400  |
| N | -2.79378400 | -0.87985700 | -0.29813000 |
| C | -1.99211400 | -1.99092200 | -0.78550300 |
| H | -2.04553900 | -2.81326100 | -0.07174700 |
| H | -2.39619300 | -2.32170400 | -1.74202900 |
| H | -0.96588200 | -1.66894600 | -0.89886900 |
| N | -0.00005400 | 0.07380400  | -0.00042200 |
| H | -1.30045900 | 3.17773500  | 0.02174200  |
| H | 1.30068000  | 3.17760400  | -0.02078700 |
| C | -6.00254900 | 0.54278900  | 0.28855400  |
| C | -5.01877800 | -2.02988300 | -0.45518400 |
| C | -6.37248800 | -1.78961200 | -0.29891300 |
| C | -6.85421700 | -0.52595500 | 0.06789600  |
| H | -6.38817000 | 1.51610600  | 0.55413600  |
| H | -7.91957700 | -0.38039000 | 0.17531000  |
| H | -7.07559700 | -2.59330300 | -0.46405700 |
| H | -4.64596300 | -3.00425500 | -0.73591000 |
| C | 5.01881000  | -2.02982600 | 0.45550900  |
| C | 6.00251500  | 0.54289400  | -0.28816400 |
| C | 6.85424400  | -0.52574900 | -0.06717000 |
| C | 6.37255200  | -1.78941500 | 0.29962000  |

|   |             |             |             |
|---|-------------|-------------|-------------|
| H | 4.64601600  | -3.00418100 | 0.73632200  |
| H | 7.07570500  | -2.59299900 | 0.46509500  |
| H | 7.91962000  | -0.38005800 | -0.17426000 |
| H | 6.38809500  | 1.51624500  | -0.55368700 |
| C | 3.62226100  | 2.45949500  | -0.83892100 |
| C | -3.62226000 | 2.45960000  | 0.83889400  |
| H | -2.83058300 | 2.59427300  | 1.57186700  |
| H | -3.54963100 | 3.22400600  | 0.06609000  |
| H | -4.57841700 | 2.56045100  | 1.34391700  |
| H | 4.57813300  | 2.56016200  | -1.34456000 |
| H | 2.83023700  | 2.59461200  | -1.57142000 |
| H | 3.55030900  | 3.22383600  | -0.06595200 |

**Compound 4b (Protonated)**

**Absolute Energy = -1125.058786 a.u.**

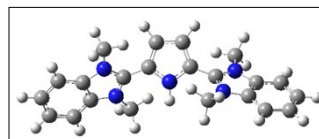

2 1

|   |             |             |             |
|---|-------------|-------------|-------------|
| C | -1.11572200 | 0.90529000  | -0.00557500 |
| C | -0.70368900 | 2.22025400  | -0.00090600 |
| C | 0.70364700  | 2.22027400  | 0.00123900  |
| C | 1.11573100  | 0.90532400  | 0.00586200  |
| C | 2.47119400  | 0.37532500  | 0.03010900  |
| C | 4.61012900  | 0.06727500  | -0.45517100 |
| C | 4.28596200  | -0.75265200 | 0.62215200  |
| N | 2.94536200  | -0.52653100 | 0.90211600  |
| N | 3.45122600  | 0.74771900  | -0.80150900 |
| C | 2.24673500  | -1.10630500 | 2.04220800  |
| H | 1.34402200  | -0.53634300 | 2.24020900  |
| H | 2.00408600  | -2.14931500 | 1.84587000  |
| H | 2.89736000  | -1.04688000 | 2.91155500  |
| C | -2.47118600 | 0.37527500  | -0.02995000 |
| C | -4.28596100 | -0.75248100 | -0.62235400 |
| C | -4.61013400 | 0.06714600  | 0.45519600  |
| N | -3.45123000 | 0.74747600  | 0.80174800  |
| N | -2.94534200 | -0.52636000 | -0.90219900 |
| C | -2.24678700 | -1.10568300 | -2.04257000 |
| H | -2.00481100 | -2.14897800 | -1.84693000 |
| H | -2.89715600 | -1.04521900 | -2.91203900 |
| H | -1.34366600 | -0.53614000 | -2.23989000 |
| N | 0.00001000  | 0.10903300  | 0.00011100  |
| H | -1.34827000 | 3.08322000  | -0.01775400 |
| H | 1.34819700  | 3.08326300  | 0.01808100  |
| C | -5.89305600 | 0.10314300  | 0.99263200  |
| C | -5.22544800 | -1.58309500 | -1.22487900 |
| C | -6.49764700 | -1.54808200 | -0.69244100 |
| C | -6.82529300 | -0.72038100 | 0.39647900  |
| H | -6.15151200 | 0.74244500  | 1.82458000  |

|   |             |             |             |
|---|-------------|-------------|-------------|
| H | -7.83794100 | -0.72993300 | 0.77370100  |
| H | -7.26665300 | -2.17344100 | -1.12304000 |
| H | -4.97891300 | -2.22290200 | -2.06015300 |
| C | 5.22542700  | -1.58352500 | 1.22435800  |
| C | 5.89302900  | 0.10336600  | -0.99266000 |
| C | 6.82524900  | -0.72038900 | -0.39680300 |
| C | 6.49760200  | -1.54841600 | 0.69186800  |
| H | 4.97890400  | -2.22360000 | 2.05942800  |
| H | 7.26659100  | -2.17395600 | 1.12223500  |
| H | 7.83788400  | -0.72987900 | -0.77406400 |
| H | 6.15148300  | 0.74292600  | -1.82440900 |
| C | 3.36784100  | 1.67991200  | -1.92098100 |
| H | 0.00000700  | -0.89892800 | 0.00031100  |
| H | 3.86096200  | 1.23065100  | -2.77959100 |
| H | 2.32622600  | 1.86887200  | -2.15776600 |
| H | 3.86459500  | 2.61263400  | -1.66103100 |
| C | -3.36768400 | 1.67896900  | 1.92178800  |
| H | -2.32604000 | 1.86817700  | 2.15822100  |
| H | -3.86486600 | 2.61169200  | 1.66265400  |
| H | -3.86029600 | 1.22902500  | 2.78033600  |

#### Compound 4b complex with AuCl

Absolute Energy = -1720.375252 a.u.

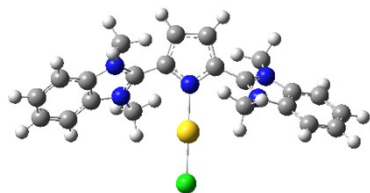

|     |             |             |             |
|-----|-------------|-------------|-------------|
| 1 1 |             |             |             |
| C   | -1.08317800 | -1.73427400 | 0.02590200  |
| C   | -0.69719600 | -3.07345500 | 0.00944100  |
| C   | 0.69831100  | -3.07319200 | -0.00939100 |
| C   | 1.08381200  | -1.73385900 | -0.02611300 |
| C   | 2.43584200  | -1.20130200 | -0.06119700 |
| C   | 4.55666400  | -0.82536900 | 0.47803300  |
| C   | 4.25438300  | -0.08006800 | -0.65729700 |
| N   | 2.93195800  | -0.35169800 | -0.97104500 |
| N   | 3.39877200  | -1.50556800 | 0.82280600  |
| C   | 2.27062800  | 0.15173900  | -2.16748900 |
| H   | 1.32654500  | -0.36762900 | -2.29486600 |
| H   | 2.08596400  | 1.22024000  | -2.06598700 |
| H   | 2.91754600  | -0.03943700 | -3.02161400 |
| C   | -2.43534800 | -1.20192800 | 0.06099700  |
| C   | -4.25408300 | -0.08124600 | 0.65748500  |
| C   | -4.55599800 | -0.82559700 | -0.47856600 |
| N   | -3.39795800 | -1.50541800 | -0.82358900 |
| N   | -2.93174800 | -0.35309000 | 0.97140200  |
| C   | -2.27058800 | 0.14977800  | 2.16816400  |

|    |             |             |             |
|----|-------------|-------------|-------------|
| H  | -2.08636600 | 1.21842600  | 2.06736800  |
| H  | -2.91738400 | -0.04223300 | 3.02219400  |
| H  | -1.32628800 | -0.36929200 | 2.29514200  |
| N  | 0.00015500  | -0.91748600 | -0.00019700 |
| H  | -1.35042900 | -3.93021100 | 0.03064700  |
| H  | 1.35184800  | -3.92971900 | -0.03058300 |
| C  | -5.81593700 | -0.79343400 | -1.06326800 |
| C  | -5.19528300 | 0.73689400  | 1.26973000  |
| C  | -6.44849800 | 0.77061400  | 0.68984200  |
| C  | -6.75338100 | 0.01920000  | -0.45561100 |
| H  | -6.05329800 | -1.37214400 | -1.94445200 |
| H  | -7.74812600 | 0.08047300  | -0.87318500 |
| H  | -7.21486100 | 1.39501600  | 1.12617700  |
| H  | -4.95832200 | 1.32392900  | 2.14538100  |
| C  | 5.19538800  | 0.73854800  | -1.26920200 |
| C  | 5.81681300  | -0.79369300 | 1.06232400  |
| C  | 6.75406500  | 0.01941400  | 0.45500800  |
| C  | 6.44881100  | 0.77176400  | -0.68972900 |
| H  | 4.95813700  | 1.32631500  | -2.14428400 |
| H  | 7.21504500  | 1.39648000  | -1.12584100 |
| H  | 7.74896200  | 0.08030800  | 0.87227800  |
| H  | 6.05447700  | -1.37312500 | 1.94295100  |
| C  | 3.26983900  | -2.34023700 | 2.00678400  |
| C  | -3.26855900 | -2.33917000 | -2.00816500 |
| Au | -0.00043900 | 1.17567800  | 0.00015100  |
| Cl | -0.00119000 | 3.44813600  | 0.00056100  |
| H  | -3.68307000 | -1.80197900 | -2.85843700 |
| H  | -2.21797900 | -2.54727600 | -2.18155800 |
| H  | -3.80964300 | -3.27291900 | -1.86684900 |
| H  | 2.21930400  | -2.54810100 | 2.18073500  |
| H  | 3.81047100  | -3.27409000 | 1.86439700  |
| H  | 3.68511200  | -1.80386300 | 2.85719300  |

#### Compound 4b + Hydride ion

Absolute Energy = -1125.490083 a.u.

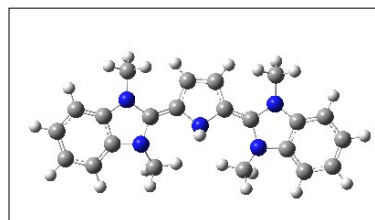

|     |             |             |             |
|-----|-------------|-------------|-------------|
| 0 1 |             |             |             |
| C   | 1.15779900  | 0.84747800  | 0.25111800  |
| C   | 0.67560600  | 2.15267100  | 0.63800800  |
| C   | -0.67458000 | 2.15325500  | 0.63869400  |
| C   | -1.15820000 | 0.84853100  | 0.25232400  |
| C   | -2.42978400 | 0.38808900  | 0.14096500  |
| C   | -4.68715100 | 0.34820000  | -0.13060800 |
| C   | -4.22701000 | -0.97477200 | -0.12607900 |

|   |             |             |             |
|---|-------------|-------------|-------------|
| N | -2.84283900 | -0.94853900 | 0.00901800  |
| N | -3.58693100 | 1.17208700  | 0.03030500  |
| C | -2.17364800 | -2.06179200 | 0.65020300  |
| H | -2.30939700 | -2.96207600 | 0.05183400  |
| H | -1.11547700 | -1.84524800 | 0.73765200  |
| H | -2.58573800 | -2.23745100 | 1.64823300  |
| C | 2.42914800  | 0.38692400  | 0.13796400  |
| C | 4.22741900  | -0.97522000 | -0.12644400 |
| C | 4.68684700  | 0.34797800  | -0.13064600 |
| N | 3.58607200  | 1.17146100  | 0.02791500  |
| N | 2.84257300  | -0.94964200 | 0.00503400  |
| C | 2.17289100  | -2.06249000 | 0.64620300  |
| H | 2.33461400  | -2.96784600 | 0.06245000  |
| H | 2.56327100  | -2.22023700 | 1.65595200  |
| H | 1.11011200  | -1.85978900 | 0.70624900  |
| N | -0.00060800 | 0.01744500  | 0.05473400  |
| H | 1.29616400  | 2.97163500  | 0.96015600  |
| H | -1.29411800 | 2.97270100  | 0.96159600  |
| C | 6.02869200  | 0.63679500  | -0.26881700 |
| C | 5.10124300  | -2.03647200 | -0.21563000 |
| C | 6.46460300  | -1.74743900 | -0.35529900 |
| C | 6.91540100  | -0.43999500 | -0.39005200 |
| H | 6.39159600  | 1.65505900  | -0.25998900 |
| H | 7.97259900  | -0.24112800 | -0.49811600 |
| H | 7.17222500  | -2.56092000 | -0.43291700 |
| H | 4.74956100  | -3.05838200 | -0.18775900 |
| C | -5.09970900 | -2.03677000 | -0.21673400 |
| C | -6.02900000 | 0.63601500  | -0.27052800 |
| C | -6.91469500 | -0.44150900 | -0.39339900 |
| C | -6.46310000 | -1.74866800 | -0.35835100 |
| H | -4.74679500 | -3.05828500 | -0.18869100 |
| H | -7.17008600 | -2.56256800 | -0.43734800 |
| H | -7.97186600 | -0.24336100 | -0.50304000 |
| H | -6.39282800 | 1.65395000  | -0.26182700 |
| C | -3.59094700 | 2.57033800  | -0.31283900 |
| C | 3.59018400  | 2.56923800  | -0.31725200 |
| H | -0.00152200 | -0.43006600 | -0.85492600 |
| H | -4.49374400 | 2.78885100  | -0.88057800 |
| H | -3.56962400 | 3.21490600  | 0.56787500  |
| H | -2.72195400 | 2.79411300  | -0.93251700 |
| H | 3.57041500  | 3.21519000  | 0.56250700  |
| H | 4.49226800  | 2.78653800  | -0.88665200 |
| H | 2.72040600  | 2.79242000  | -0.93598600 |

**Compound 4b (ASE)**

**Absolute Energy = -1125.934241 a.u.**

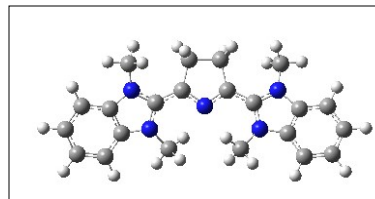

|     |             |             |             |
|-----|-------------|-------------|-------------|
| I 1 |             |             |             |
| C   | -1.09236700 | 1.04822200  | 0.04306700  |
| C   | -0.75908900 | 2.52977100  | 0.14287200  |
| C   | 0.75906700  | 2.52981300  | -0.14295400 |
| C   | 1.09240200  | 1.04826700  | -0.04326700 |
| C   | 2.37297800  | 0.45602000  | 0.00083500  |
| C   | 4.59114600  | 0.16539500  | -0.16055100 |
| C   | 4.03104800  | -1.01538400 | 0.32341900  |
| N   | 2.66351000  | -0.80085900 | 0.42716600  |
| N   | 3.54214500  | 1.05530000  | -0.35373600 |
| C   | 1.74283600  | -1.75282600 | 1.01772900  |
| H   | 1.03460800  | -1.22915800 | 1.65204600  |
| H   | 1.19344200  | -2.29112900 | 0.24778900  |
| H   | 2.32193800  | -2.45197400 | 1.61419600  |
| C   | -2.37294200 | 0.45596900  | -0.00098300 |
| C   | -4.03110500 | -1.01536500 | -0.32339900 |
| C   | -4.59110400 | 0.16543300  | 0.16064200  |
| N   | -3.54204600 | 1.05529900  | 0.35369500  |
| N   | -2.66357200 | -0.80089300 | -0.42731500 |
| C   | -1.74302800 | -1.75290600 | -1.01801000 |
| H   | -1.19353300 | -2.29121800 | -0.24814900 |
| H   | -2.32226100 | -2.45204200 | -1.61436800 |
| H   | -1.03488100 | -1.22928300 | -1.65245200 |
| N   | 0.00003200  | 0.29433500  | -0.00010400 |
| H   | -1.30688200 | 3.14206800  | -0.57049100 |
| H   | 1.30682800  | 3.14207700  | 0.57046000  |
| C   | -5.95618800 | 0.28708500  | 0.36982100  |
| C   | -4.81218100 | -2.12338500 | -0.61418400 |
| C   | -6.17706300 | -2.00258200 | -0.40626000 |
| C   | -6.73857200 | -0.81896900 | 0.07723200  |
| H   | -6.40270500 | 1.19944000  | 0.73747000  |
| H   | -7.80714900 | -0.76268000 | 0.22714100  |
| H   | -6.81984600 | -2.84419600 | -0.62080500 |
| H   | -4.38409100 | -3.04576600 | -0.97864800 |
| C   | 4.81204700  | -2.12343400 | 0.61429500  |
| C   | 5.95625900  | 0.28699700  | -0.36956700 |
| C   | 6.73856900  | -0.81908800 | -0.07688500 |
| C   | 6.17695800  | -2.00268100 | 0.40653500  |
| H   | 4.38388000  | -3.04580300 | 0.97870100  |
| H   | 6.81968500  | -2.84432000 | 0.62115200  |
| H   | 7.80716500  | -0.76283800 | -0.22666800 |
| H   | 6.40285500  | 1.19933500  | -0.73716100 |
| C   | 3.67666200  | 2.32863400  | -1.03986700 |
| C   | -3.67640300 | 2.32865200  | 1.03982100  |
| H   | -3.01796700 | 2.35761200  | 1.90459500  |

|   |             |            |             |
|---|-------------|------------|-------------|
| H | -3.45702500 | 3.16250700 | 0.37794900  |
| H | -4.70095600 | 2.41748000 | 1.38550600  |
| H | 4.70127900  | 2.41741400 | -1.38537500 |
| H | 3.01838900  | 2.35759800 | -1.90476100 |
| H | 3.45720200  | 3.16251400 | -0.37805300 |
| H | -0.95903400 | 2.92405900 | 1.13978400  |
| H | 0.95899000  | 2.92419100 | -1.13983400 |

**Compound 4c (Singlet)**

**Absolute Energy = -1586.711893 a.u.**

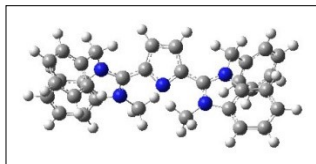

|     |             |             |             |
|-----|-------------|-------------|-------------|
| 1 1 |             |             |             |
| C   | -0.98612200 | 0.40982600  | 0.74054200  |
| C   | -0.64028800 | 0.26134100  | 2.10094700  |
| C   | 0.64024600  | -0.26148800 | 2.10094500  |
| C   | 0.98611000  | -0.40988800 | 0.74053900  |
| C   | 2.19679600  | -0.96333900 | 0.18622300  |
| C   | 4.33659300  | -1.48434700 | -0.15015600 |
| C   | 3.57722200  | -2.09742900 | -1.14150000 |
| N   | 2.25391100  | -1.75869700 | -0.89593200 |
| N   | 3.44736800  | -0.78382900 | 0.65519600  |
| C   | 1.12901000  | -2.28043100 | -1.65575900 |
| H   | 0.24442100  | -2.27188500 | -1.02968200 |
| H   | 0.94705200  | -1.66404100 | -2.53331000 |
| H   | 1.36872300  | -3.29739200 | -1.95706300 |
| C   | 3.87141800  | 0.14279800  | 1.70284300  |
| C   | -2.19679400 | 0.96331600  | 0.18623500  |
| C   | -3.57718900 | 2.09750200  | -1.14143800 |
| C   | -4.33658300 | 1.48435500  | -0.15015200 |
| N   | -3.44737700 | 0.78377900  | 0.65517000  |
| N   | -2.25388400 | 1.75874700  | -0.89586800 |
| C   | -3.87145300 | -0.14291500 | 1.70274700  |
| C   | -1.12896900 | 2.28053200  | -1.65563700 |
| H   | -0.94702500 | 1.66422600  | -2.53325100 |
| H   | -1.36865600 | 3.29752900  | -1.95684000 |
| H   | -0.24438200 | 2.27190000  | -1.02955900 |
| N   | 0.00000300  | -0.00000600 | -0.08368100 |
| H   | -1.22761600 | 0.53434600  | 2.96232900  |
| H   | 1.22755300  | -0.53454700 | 2.96232400  |
| C   | -5.71709100 | 1.62096100  | -0.09726300 |
| C   | -4.15903600 | 2.88519200  | -2.12544300 |
| C   | -5.53359500 | 3.02959900  | -2.07023500 |
| C   | -6.29851500 | 2.40783300  | -1.07496300 |
| H   | -6.30791100 | 1.12814600  | 0.66126000  |
| H   | -7.37064100 | 2.54285300  | -1.07455000 |
| H   | -6.03091500 | 3.63369800  | -2.81556900 |

|   |             |             |             |
|---|-------------|-------------|-------------|
| H | -3.57278700 | 3.35848100  | -2.89984400 |
| C | 4.15909300  | -2.88504800 | -2.12554800 |
| C | 5.71710100  | -1.62095000 | -0.09724800 |
| C | 6.29854800  | -2.40775200 | -1.07499200 |
| C | 5.53365200  | -3.02945200 | -2.07032200 |
| H | 3.57286200  | -3.35828500 | -2.89999400 |
| H | 6.03099000  | -3.63349600 | -2.81568900 |
| H | 7.37067500  | -2.54276600 | -1.07456600 |
| H | 6.30790300  | -1.12818400 | 0.66132100  |
| C | -4.78364800 | -1.22095600 | 1.16639700  |
| C | -4.48294600 | -1.86761100 | -0.02759600 |
| C | -5.91167600 | -1.59743400 | 1.88316600  |
| C | -5.30465600 | -2.87863200 | -0.50007100 |
| H | -3.60459900 | -1.57658000 | -0.59293000 |
| C | -6.73239300 | -2.61472400 | 1.41374000  |
| H | -6.15267400 | -1.09463400 | 2.81225400  |
| C | -6.43097300 | -3.25458300 | 0.22102200  |
| H | -5.06781900 | -3.37483900 | -1.43121400 |
| H | -7.60916400 | -2.90155600 | 1.97776100  |
| H | -7.07245400 | -4.04258200 | -0.14838500 |
| C | 4.78361700  | 1.22088100  | 1.16658200  |
| C | 4.48293100  | 1.86761200  | -0.02737400 |
| C | 5.91162900  | 1.59731900  | 1.88339500  |
| C | 5.30464300  | 2.87866900  | -0.49976900 |
| H | 3.60459600  | 1.57661200  | -0.59274300 |
| C | 6.73234800  | 2.61464500  | 1.41405000  |
| H | 6.15261500  | 1.09446000  | 2.81245300  |
| C | 6.43094500  | 3.25458100  | 0.22136800  |
| H | 5.06781800  | 3.37493600  | -1.43088300 |
| H | 7.60910700  | 2.90144700  | 1.97810500  |
| H | 7.07242700  | 4.04260800  | -0.14797600 |
| H | 2.97131300  | 0.58375300  | 2.12321200  |
| H | 4.36926700  | -0.42827500 | 2.48707500  |
| H | -2.97135900 | -0.58390300 | 2.12310500  |
| H | -4.36931400 | 0.42810900  | 2.48700800  |

**Compound 4c (Triplet)**

**Absolute Energy = -1586.607488 a.u.**

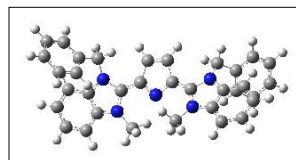

|     |             |             |             |
|-----|-------------|-------------|-------------|
| 1 3 |             |             |             |
| C   | -1.04728400 | 0.28275000  | 0.33236100  |
| C   | -0.64704700 | 0.16045100  | 1.74887100  |
| C   | 0.64713700  | -0.17517000 | 1.74822600  |
| C   | 1.04851700  | -0.28759000 | 0.33113600  |
| C   | 2.29105000  | -0.70484500 | -0.15532300 |
| C   | 4.43956600  | -1.34338500 | -0.27184700 |

|   |             |             |             |
|---|-------------|-------------|-------------|
| C | 3.82460500  | -1.64454600 | -1.49576400 |
| N | 2.51677900  | -1.22746700 | -1.41064500 |
| N | 3.49118400  | -0.74848000 | 0.52985000  |
| C | 1.50902800  | -1.50063300 | -2.42238100 |
| H | 0.65971300  | -2.00781500 | -1.97464200 |
| H | 1.16423200  | -0.57467100 | -2.87342900 |
| H | 1.95916800  | -2.13730400 | -3.17708500 |
| C | 3.83548100  | 0.00794800  | 1.73162500  |
| C | -2.28942300 | 0.70373500  | -0.15225100 |
| C | -3.82167300 | 1.65279900  | -1.48741800 |
| C | -4.43787600 | 1.34288300  | -0.26633700 |
| N | -3.49017700 | 0.74208200  | 0.53188900  |
| N | -2.51381800 | 1.23536900  | -1.40385800 |
| C | -3.83448000 | -0.02140300 | 1.72922600  |
| C | -1.50514800 | 1.51576000  | -2.41271400 |
| H | -1.16112800 | 0.59317700  | -2.87124900 |
| H | -1.95412700 | 2.15922100  | -3.16233900 |
| H | -0.65555700 | 2.01821300  | -1.96024100 |
| N | 0.00089100  | 0.00044200  | -0.49123300 |
| H | -1.25465900 | 0.35548400  | 2.61565400  |
| H | 1.25402000  | -0.37636400 | 2.61410600  |
| C | -5.77879500 | 1.62753600  | -0.03491800 |
| C | -4.52765500 | 2.27346900  | -2.51354300 |
| C | -5.85836900 | 2.56474500  | -2.27511600 |
| C | -6.47416000 | 2.24724100  | -1.05723800 |
| H | -6.25656700 | 1.37197700  | 0.89916600  |
| H | -7.51743800 | 2.49000800  | -0.91508000 |
| H | -6.43864900 | 3.04675700  | -3.04890500 |
| H | -4.06795600 | 2.51482800  | -3.46024800 |
| C | 4.53175500  | -2.25785300 | -2.52552300 |
| C | 5.78036400  | -1.62912400 | -0.04119100 |
| C | 6.47688800  | -2.24143900 | -1.06716200 |
| C | 5.86229300  | -2.55054700 | -2.28781400 |
| H | 4.07309500  | -2.49259900 | -3.47439200 |
| H | 6.44344000  | -3.02695300 | -3.06441800 |
| H | 7.52011700  | -2.48486600 | -0.92578600 |
| H | 6.25714500  | -1.37985100 | 0.89511000  |
| C | -4.97314100 | -0.98964900 | 1.50062100  |
| C | -5.00427200 | -1.78540500 | 0.36060600  |
| C | -5.97604200 | -1.11636000 | 2.45192100  |
| C | -6.03084800 | -2.69730000 | 0.17448500  |
| H | -4.22644500 | -1.68594900 | -0.38833000 |
| C | -7.00288200 | -2.03363900 | 2.26892500  |
| H | -5.95937000 | -0.49460500 | 3.33921100  |
| C | -7.03211500 | -2.82333900 | 1.12972300  |
| H | -6.05152700 | -3.31096700 | -0.71559200 |
| H | -7.78111300 | -2.12542800 | 3.01397200  |
| H | -7.83351700 | -3.53410500 | 0.98330900  |
| C | 4.97103100  | 0.98088900  | 1.50723600  |
| C | 4.99868700  | 1.78293800  | 0.37154300  |
| C | 5.97449800  | 1.10539800  | 2.45823200  |
| C | 6.02231700  | 2.69896100  | 0.18945200  |
| H | 4.22046700  | 1.68524600  | -0.37722300 |

|   |             |             |             |
|---|-------------|-------------|-------------|
| C | 6.99836900  | 2.02678400  | 2.27929300  |
| H | 5.96058300  | 0.47874900  | 3.34212400  |
| C | 7.02410300  | 2.82282500  | 1.14441700  |
| H | 6.04028500  | 3.31752000  | -0.69729500 |
| H | 7.77705900  | 2.11682700  | 3.02407400  |
| H | 7.82321000  | 3.53681100  | 1.00115600  |
| H | 2.95267600  | 0.56609200  | 2.02683300  |
| H | 4.08309400  | -0.68828500 | 2.53488900  |
| H | -2.95264800 | -0.58410600 | 2.01871500  |
| H | -4.07848100 | 0.67000200  | 2.53776000  |

### Compound 4c (Protonated)

Absolute Energy = -1586.997541 a.u.

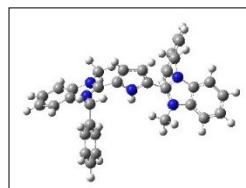

|     |             |             |             |
|-----|-------------|-------------|-------------|
| 2 1 |             |             |             |
| C   | -1.01473300 | 0.46039400  | 1.24320900  |
| C   | -0.64277500 | 0.29025200  | 2.55627200  |
| C   | 0.64275200  | -0.29083600 | 2.55626500  |
| C   | 1.01481600  | -0.46071300 | 1.24319800  |
| C   | 2.24104200  | -1.03608900 | 0.69675000  |
| C   | 4.37202200  | -1.33256500 | 0.18035400  |
| C   | 3.64956800  | -2.41752600 | -0.30918000 |
| N   | 2.32333400  | -2.19735800 | 0.03415700  |
| N   | 3.45916600  | -0.49717600 | 0.80705900  |
| C   | 1.24466900  | -3.14497400 | -0.21536900 |
| H   | 0.34442800  | -2.80478900 | 0.28770500  |
| H   | 1.06712700  | -3.22714400 | -1.28579100 |
| H   | 1.53187400  | -4.11660600 | 0.18065200  |
| C   | 3.80115700  | 0.80517300  | 1.38012700  |
| C   | -2.24090500 | 1.03589800  | 0.69678000  |
| C   | -3.64930300 | 2.41751500  | -0.30908600 |
| C   | -4.37185500 | 1.33259200  | 0.18038600  |
| N   | -3.45907700 | 0.49708400  | 0.80704800  |
| N   | -2.32309000 | 2.19721300  | 0.03425000  |
| C   | -3.80119800 | -0.80526600 | 1.38004000  |
| C   | -1.24434800 | 3.14476100  | -0.21520000 |
| H   | -1.06674500 | 3.22694900  | -1.28561000 |
| H   | -1.53151000 | 4.11640200  | 0.18083100  |
| H   | -0.34415500 | 2.80450700  | 0.28791300  |
| N   | 0.00007500  | -0.00007700 | 0.44654500  |
| H   | -1.22866000 | 0.56528100  | 3.41740600  |
| H   | 1.22857100  | -0.56603200 | 3.41739100  |
| C   | -5.74787100 | 1.22297100  | 0.00205200  |
| C   | -4.26298200 | 3.46576500  | -0.98861500 |
| C   | -5.62790400 | 3.36279300  | -1.15639300 |

|   |             |             |             |
|---|-------------|-------------|-------------|
| C | -6.35635500 | 2.26017600  | -0.67242400 |
| H | -6.30457600 | 0.36931200  | 0.36184700  |
| H | -7.42366000 | 2.22702500  | -0.83843800 |
| H | -6.15583100 | 4.14917400  | -1.67678500 |
| H | -3.70674200 | 4.31249500  | -1.36475000 |
| C | 4.26334400  | -3.46568400 | -0.98876400 |
| C | 5.74802800  | -1.22281000 | 0.00203000  |
| C | 6.35660800  | -2.25992200 | -0.67250100 |
| C | 5.62825800  | -3.36257900 | -1.15653100 |
| H | 3.70718200  | -4.31244400 | -1.36494700 |
| H | 6.15625800  | -4.14888500 | -1.67696400 |
| H | 7.42391000  | -2.22666600 | -0.83851000 |
| H | 6.30465500  | -0.36912000 | 0.36187400  |
| C | -4.23685900 | -1.79824700 | 0.32718500  |
| C | -3.74356700 | -1.74964600 | -0.97147700 |
| C | -5.12644100 | -2.80449200 | 0.68605000  |
| C | -4.13429300 | -2.70133600 | -1.90340700 |
| H | -3.07229700 | -0.95322800 | -1.27488800 |
| C | -5.51048600 | -3.76027200 | -0.24333900 |
| H | -5.52403600 | -2.84222300 | 1.69311900  |
| C | -5.01529100 | -3.70978000 | -1.53903000 |
| H | -3.76115700 | -2.64924800 | -2.91699900 |
| H | -6.20514000 | -4.53774500 | 0.04248800  |
| H | -5.32451000 | -4.44753700 | -2.26609600 |
| C | 4.23662400  | 1.79829100  | 0.32732000  |
| C | 3.74333200  | 1.74967200  | -0.97134100 |
| C | 5.12602700  | 2.80467800  | 0.68623400  |
| C | 4.13388000  | 2.70148600  | -1.90322200 |
| H | 3.07221300  | 0.95314400  | -1.27479700 |
| C | 5.50989200  | 3.76057800  | -0.24310500 |
| H | 5.52362300  | 2.84242400  | 1.69330100  |
| C | 5.01469700  | 3.71006900  | -1.53879600 |
| H | 3.76075000  | 2.64938200  | -2.91681600 |
| H | 6.20441000  | 4.53815900  | 0.04275900  |
| H | 5.32378100  | 4.44792000  | -2.26582400 |
| H | 2.92450600  | 1.15774800  | 1.92145700  |
| H | 4.59572900  | 0.64219100  | 2.10827200  |
| H | -2.92455600 | -1.15799600 | 1.92128500  |
| H | -4.59570300 | -0.64223900 | 2.10824800  |
| H | 0.00011700  | 0.00002400  | -0.56158100 |

**Compound 4c complex with AuCl**

**Absolute Energy = -2182.305366 a.u.**

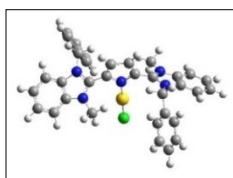

|     |             |             |             |
|-----|-------------|-------------|-------------|
| I 1 |             |             |             |
| C   | 0.99538700  | 0.46170500  | -1.75285200 |
| C   | 0.63946200  | 0.29059600  | -3.09873500 |
| C   | -0.63913000 | -0.29123400 | -3.09883400 |
| C   | -0.99550100 | -0.46177200 | -1.75300300 |
| C   | -2.21740800 | -1.05510100 | -1.21589000 |
| C   | -4.37358900 | -1.39225700 | -0.72076100 |
| C   | -3.62941100 | -2.47003200 | -0.21595800 |
| N   | -2.29870800 | -2.23036900 | -0.55166100 |
| N   | -3.46152200 | -0.53075200 | -1.33274600 |
| C   | -1.19082300 | -3.13783600 | -0.24904500 |
| H   | -0.30704300 | -2.81065300 | -0.79348400 |
| H   | -0.98031900 | -3.12190700 | 0.82311000  |
| H   | -1.46448600 | -4.14721700 | -0.56474500 |
| C   | -3.79806800 | 0.77946500  | -1.91997500 |
| C   | 2.21710700  | 1.05524700  | -1.21563600 |
| C   | 3.62874800  | 2.47031100  | -0.21536400 |
| C   | 4.37323900  | 1.39298300  | -0.72064800 |
| N   | 3.46139900  | 0.53137500  | -1.33283600 |
| N   | 2.29808600  | 2.23031800  | -0.55099400 |
| C   | 3.79832100  | -0.77866800 | -1.92026200 |
| C   | 1.19000200  | 3.13745400  | -0.24813900 |
| H   | 0.97969600  | 3.12140300  | 0.82405100  |
| H   | 1.46332600  | 4.14693800  | -0.56381600 |
| H   | 0.30620800  | 2.81005400  | -0.79241400 |
| N   | -0.00021300 | 0.00014900  | -0.93075800 |
| H   | 1.22798000  | 0.57329900  | -3.96123700 |
| H   | -1.22740100 | -0.57421700 | -3.96141200 |
| C   | 5.76085600  | 1.32472000  | -0.56375700 |
| C   | 4.23368200  | 3.52926400  | 0.46772200  |
| C   | 5.61577700  | 3.46371400  | 0.61984100  |
| C   | 6.36518600  | 2.38081800  | 0.11254900  |
| H   | 6.33842800  | 0.48636300  | -0.93440700 |
| H   | 7.44001200  | 2.36752600  | 0.26038500  |
| H   | 6.12924500  | 4.26188800  | 1.14567200  |
| H   | 3.65974500  | 4.35814700  | 0.86677300  |
| C   | -4.23463800 | -3.52901800 | 0.46682100  |
| C   | -5.76116900 | -1.32357000 | -0.56370100 |
| C   | -6.36578600 | -2.37970500 | 0.11228300  |
| C   | -5.61669200 | -3.46304200 | 0.61910900  |
| H   | -3.66094600 | -4.35823900 | 0.86552400  |
| H   | -6.13037800 | -4.26122100 | 1.14472000  |
| H   | -7.44059200 | -2.36609900 | 0.26024500  |
| H   | -6.33848300 | -0.48487400 | -0.93398700 |
| C   | 4.33831200  | -1.77113400 | -0.90548700 |
| C   | 3.72944800  | -1.93889500 | 0.34622500  |
| C   | 5.43781600  | -2.56917400 | -1.24601100 |
| C   | 4.22006200  | -2.88780300 | 1.24579500  |
| H   | 2.87849200  | -1.32581000 | 0.63367900  |
| C   | 5.92197700  | -3.52662400 | -0.34952800 |
| H   | 5.91878600  | -2.44723100 | -2.21402200 |
| C   | 5.31560500  | -3.68511200 | 0.89898100  |
| H   | 3.74723900  | -2.99998700 | 2.21685700  |



|    |             |             |             |
|----|-------------|-------------|-------------|
| H  | 6.77513200  | -4.13948300 | -0.62442600 |
| H  | 5.69668200  | -4.42146600 | 1.60001100  |
| C  | -4.33778300 | 1.77194700  | -0.90507400 |
| C  | -3.72914000 | 1.93911100  | 0.34682400  |
| C  | -5.43682800 | 2.57058900  | -1.24567000 |
| C  | -4.21951100 | 2.88804900  | 1.24649500  |
| H  | -2.87855500 | 1.32554100  | 0.63433500  |
| C  | -5.92073300 | 3.52807100  | -0.34908400 |
| H  | -5.91764800 | 2.44908300  | -2.21381000 |
| C  | -5.31457900 | 3.68598000  | 0.89960400  |
| H  | -3.74687300 | 2.99977700  | 2.21769900  |
| H  | -6.77353500 | 4.14139700  | -0.62403800 |
| H  | -5.69546700 | 4.42235400  | 1.60071400  |
| H  | -2.88240800 | 1.14708800  | -2.38865900 |
| H  | -4.52867800 | 0.60894500  | -2.71668200 |
| H  | 2.88277100  | -1.14650300 | -2.38898700 |
| H  | 4.52887800  | -0.60783100 | -2.71694600 |
| Au | 0.00000600  | -0.00051500 | 1.14097400  |
| Cl | 0.00030700  | -0.00151300 | 3.44719300  |

### Compound 4c + Hydride ion

Absolute Energy = -1587.412351 a.u.

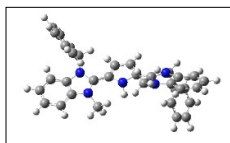

|     |             |             |             |
|-----|-------------|-------------|-------------|
| 0 1 |             |             |             |
| C   | -1.02745600 | -0.47058100 | -0.39797900 |
| C   | -0.60302900 | -0.44720500 | -1.78056100 |
| C   | 0.67098100  | -0.00846800 | -1.85927900 |
| C   | 1.15231300  | 0.29711400  | -0.53423000 |
| C   | 2.33442600  | 0.81158400  | -0.11557100 |
| C   | 4.49652900  | 1.50109900  | -0.02992600 |
| C   | 3.89154700  | 1.83199700  | 1.18643400  |
| N   | 2.57512900  | 1.37614600  | 1.14710800  |
| N   | 3.54382700  | 0.87484300  | -0.82859700 |
| C   | 1.52099100  | 2.02280000  | 1.90657300  |
| H   | 0.80998700  | 2.49463800  | 1.22778200  |
| H   | 0.97605400  | 1.31625400  | 2.52911100  |
| H   | 1.97252200  | 2.78134400  | 2.54089700  |
| C   | 3.95581800  | -0.09374900 | -1.82241200 |
| C   | -2.25840400 | -0.75533800 | 0.09294900  |
| C   | -3.90586500 | -1.48937500 | 1.47697700  |
| C   | -4.41736300 | -1.45885000 | 0.17690300  |
| N   | -3.42354700 | -0.96946600 | -0.67050600 |
| N   | -2.60847600 | -0.97919200 | 1.43617300  |
| C   | -3.80122700 | -0.13116500 | -1.79909800 |
| C   | -1.63575900 | -1.31884000 | 2.44857600  |

|   |             |             |             |
|---|-------------|-------------|-------------|
| H | -0.99609600 | -0.46896700 | 2.67249100  |
| H | -2.16045500 | -1.59550800 | 3.35820200  |
| H | -1.02325000 | -2.16978500 | 2.13141000  |
| N | 0.08967100  | -0.01136500 | 0.39016100  |
| H | -1.20684900 | -0.75237600 | -2.61874100 |
| H | 1.21117500  | 0.15809300  | -2.77663300 |
| C | -5.71603600 | -1.83034200 | -0.09400800 |
| C | -4.67391500 | -1.94125000 | 2.53110700  |
| C | -5.98372900 | -2.34579400 | 2.25547000  |
| C | -6.49895200 | -2.28322300 | 0.97175100  |
| H | -6.11718700 | -1.77029400 | -1.09649200 |
| H | -7.51995300 | -2.58679400 | 0.78793600  |
| H | -6.60419900 | -2.70509800 | 3.06466500  |
| H | -4.29330100 | -1.97090400 | 3.54228300  |
| C | 4.59862400  | 2.48082800  | 2.17743600  |
| C | 5.82701400  | 1.76995300  | -0.26900500 |
| C | 6.54659100  | 2.42523600  | 0.73489600  |
| C | 5.94187500  | 2.78122400  | 1.92865700  |
| H | 4.14207700  | 2.73476100  | 3.12389200  |
| H | 6.51725200  | 3.29004600  | 2.68947100  |
| H | 7.59117800  | 2.65235600  | 0.57444300  |
| H | 6.29983300  | 1.48129800  | -1.19776900 |
| C | -4.77454800 | 0.97223200  | -1.44002200 |
| C | -4.64367900 | 1.67070800  | -0.24336000 |
| C | -5.79182800 | 1.32024000  | -2.31854700 |
| C | -5.51514300 | 2.70392800  | 0.06278000  |
| H | -3.86021400 | 1.39625700  | 0.45394500  |
| C | -6.66391400 | 2.35822600  | -2.01604200 |
| H | -5.90704700 | 0.77179200  | -3.24632600 |
| C | -6.52667400 | 3.05248100  | -0.82385200 |
| H | -5.40740000 | 3.23801000  | 0.99732100  |
| H | -7.45398000 | 2.61745900  | -2.70809600 |
| H | -7.20758900 | 3.85724300  | -0.58192200 |
| C | 4.79886500  | -1.22585900 | -1.26896400 |
| C | 4.64807200  | -1.66525200 | 0.04149200  |
| C | 5.71592500  | -1.86524200 | -2.09474500 |
| C | 5.39873100  | -2.73198000 | 0.51374900  |
| H | 3.94736300  | -1.16472900 | 0.69910900  |
| C | 6.46550000  | -2.93490400 | -1.62573100 |
| H | 5.84751800  | -1.52040100 | -3.11394900 |
| C | 6.30747800  | -3.37154300 | -0.31838100 |
| H | 5.27677300  | -3.06222300 | 1.53663400  |
| H | 7.17747200  | -3.42150300 | -2.27891900 |
| H | 6.89418500  | -4.20089700 | 0.05266900  |
| H | 3.06411100  | -0.51175900 | -2.27995200 |
| H | 4.50772800  | 0.42064700  | -2.61219200 |
| H | -2.89523800 | 0.31827900  | -2.19543200 |
| H | -4.22599700 | -0.75533500 | -2.58833500 |
| H | 0.40474800  | -0.69281400 | 1.06789900  |

### Compound 4c (ASE)

Absolute Energy = -1587.869076

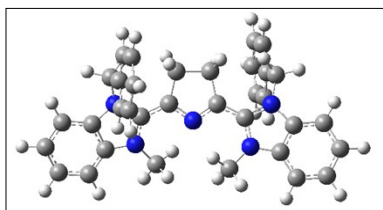

| l 1 |             |             |             |
|-----|-------------|-------------|-------------|
| C   | -1.04159800 | -0.33183300 | -0.39884900 |
| C   | -0.75895000 | -0.14352100 | -1.87948200 |
| C   | 0.75904700  | 0.14278100  | -1.87952900 |
| C   | 1.04167100  | 0.33166300  | -0.39896400 |
| C   | 2.24133900  | 0.76393100  | 0.20360000  |
| C   | 4.40734800  | 1.24627300  | 0.54340800  |
| C   | 3.71599700  | 1.49232500  | 1.72778300  |
| N   | 2.38044400  | 1.20463500  | 1.48260400  |
| N   | 3.46879900  | 0.81795500  | -0.38847500 |
| C   | 1.31853400  | 1.46977300  | 2.43311600  |
| H   | 0.45157800  | 1.86110600  | 1.91043300  |
| H   | 1.03147000  | 0.56071900  | 2.95840300  |
| H   | 1.68275500  | 2.20654900  | 3.14387500  |
| C   | 3.83619600  | 0.22012800  | -1.66140200 |
| C   | -2.24128200 | -0.76387400 | 0.20385400  |
| C   | -3.71599800 | -1.49172900 | 1.72824300  |
| C   | -4.40730300 | -1.24611400 | 0.54375100  |
| N   | -3.46872400 | -0.81810900 | -0.38824400 |
| N   | -2.38043500 | -1.20412800 | 1.48301100  |
| C   | -3.83608900 | -0.22067400 | -1.66136700 |
| C   | -1.31857200 | -1.46894100 | 2.43366700  |
| H   | -1.03145400 | -0.55968500 | 2.95857300  |
| H   | -1.68287600 | -2.20538300 | 3.14473000  |
| H   | -0.45163200 | -1.86057600 | 1.91118700  |
| N   | 0.00002900  | 0.00006900  | 0.35545700  |
| H   | -1.00135700 | -1.02339100 | -2.47306700 |
| H   | 1.00145900  | 1.02242500  | -2.47344900 |
| C   | -5.77946000 | -1.42320300 | 0.45642800  |
| C   | -4.36465900 | -1.93936000 | 2.86876800  |
| C   | -5.73520700 | -2.12770300 | 2.77940300  |
| C   | -6.43003200 | -1.87066800 | 1.59603700  |
| H   | -6.32876900 | -1.22034100 | -0.45136100 |
| H   | -7.49982600 | -2.01971600 | 1.56721100  |
| H   | -6.27785500 | -2.47383400 | 3.64732700  |
| H   | -3.83579100 | -2.12448100 | 3.79235500  |
| C   | 4.36461500  | 1.94037200  | 2.86816900  |
| C   | 5.77950800  | 1.42332700  | 0.45607400  |
| C   | 6.43003700  | 1.87120800  | 1.59554300  |
| C   | 5.73516600  | 2.12867800  | 2.77878800  |
| H   | 3.83571100  | 2.12583000  | 3.79167000  |
| H   | 6.27778300  | 2.47512500  | 3.64660600  |
| H   | 7.49983300  | 2.02024300  | 1.56670400  |

|   |             |             |             |
|---|-------------|-------------|-------------|
| H | 6.32885300  | 1.22013000  | -0.45162000 |
| C | -3.84138800 | 1.29212300  | -1.64093200 |
| C | -3.91688900 | 2.01148800  | -0.45546400 |
| C | -3.79892100 | 1.97522000  | -2.85295800 |
| C | -3.95164400 | 3.40012700  | -0.48240500 |
| H | -3.95799800 | 1.49493900  | 0.49587900  |
| C | -3.83643300 | 3.36042400  | -2.87982900 |
| H | -3.73641300 | 1.41917100  | -3.78142800 |
| C | -3.91216800 | 4.07648000  | -1.69198400 |
| H | -4.01530900 | 3.95231700  | 0.44523700  |
| H | -3.80542700 | 3.88117200  | -3.82701700 |
| H | -3.94154300 | 5.15706700  | -1.71106000 |
| C | 3.84140800  | -1.29266000 | -1.64052300 |
| C | 3.91673700  | -2.01169200 | -0.45484300 |
| C | 3.79902100  | -1.97609900 | -2.85236000 |
| C | 3.95140900  | -3.40034000 | -0.48138500 |
| H | 3.95778000  | -1.49487100 | 0.49635600  |
| C | 3.83644900  | -3.36131200 | -2.87883300 |
| H | 3.73664100  | -1.42031000 | -3.78099400 |
| C | 3.91201800  | -4.07703400 | -1.69077500 |
| H | 4.01494300  | -3.95227000 | 0.44642000  |
| H | 3.80550900  | -3.88232800 | -3.82587600 |
| H | 3.94132700  | -5.15762800 | -1.70954100 |
| H | 3.17520100  | 0.58845400  | -2.44171000 |
| H | 4.83006200  | 0.59621300  | -1.90087900 |
| H | -3.17505000 | -0.58919900 | -2.44154400 |
| H | -4.82993000 | -0.59687600 | -1.90076600 |
| H | -1.31353400 | 0.70435000  | -2.28594900 |
| H | 1.31363800  | -0.70524400 | -2.28566700 |

#### Compound 4d (Singlet)

Absolute Energy = -1731.895738 a.u.

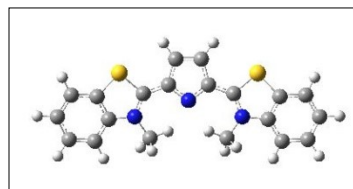

| l 1 |             |             |             |
|-----|-------------|-------------|-------------|
| C   | 1.06762400  | 1.01134400  | 0.02409300  |
| C   | 0.68439000  | 2.38220400  | 0.00934800  |
| C   | -0.68439400 | 2.38220200  | -0.00929900 |
| C   | -1.06762200 | 1.01134000  | -0.02405400 |
| C   | -2.41965400 | 0.54843900  | -0.02604400 |
| C   | -4.87995400 | 0.39004000  | 0.16065800  |
| C   | -4.26003300 | -0.81177800 | -0.17076700 |
| N   | -2.87349500 | -0.67753200 | -0.28401400 |
| C   | -2.05730600 | -1.81288900 | -0.70872700 |
| H   | -1.08412200 | -1.45320900 | -1.01455100 |
| H   | -1.94542700 | -2.51065600 | 0.12040300  |

|   |             |             |             |
|---|-------------|-------------|-------------|
| H | -2.56513600 | -2.30316200 | -1.53567000 |
| C | 2.41965600  | 0.54844600  | 0.02607500  |
| C | 4.26003600  | -0.81177400 | 0.17077000  |
| C | 4.87994900  | 0.39003800  | -0.16069000 |
| N | 2.87350100  | -0.67752200 | 0.28406200  |
| C | 2.05731700  | -1.81286100 | 0.70883300  |
| H | 1.94524500  | -2.51056400 | -0.12032500 |
| H | 2.56526100  | -2.30322000 | 1.53565400  |
| H | 1.08420800  | -1.45314700 | 1.01485300  |
| N | 0.00000200  | 0.18988400  | -0.00000500 |
| H | 1.33590500  | 3.24120700  | 0.02774100  |
| H | -1.33591100 | 3.24120300  | -0.02767500 |
| C | 6.25872200  | 0.47197100  | -0.30641100 |
| C | 5.00322500  | -1.97246200 | 0.35517300  |
| C | 6.37536900  | -1.88860600 | 0.20705200  |
| C | 6.99792500  | -0.68095200 | -0.11742100 |
| H | 6.73637700  | 1.40703700  | -0.56188100 |
| H | 8.07247600  | -0.64690700 | -0.22604700 |
| H | 6.97595600  | -2.77651200 | 0.34363300  |
| H | 4.52990000  | -2.91233900 | 0.59850600  |
| C | -5.00321600 | -1.97246700 | -0.35518500 |
| C | -6.25873100 | 0.47197500  | 0.30633300  |
| C | -6.99793000 | -0.68094900 | 0.11733200  |
| C | -6.37536600 | -1.88860800 | -0.20710900 |
| H | -4.52988400 | -2.91234500 | -0.59849800 |
| H | -6.97595000 | -2.77651300 | -0.34370200 |
| H | -8.07248400 | -0.64690200 | 0.22592400  |
| H | -6.73639400 | 1.40704500  | 0.56177800  |
| S | -3.69423400 | 1.63804000  | 0.35841700  |
| S | 3.69422700  | 1.63803900  | -0.35843100 |

#### Compound 4d (Triplet)

Absolute Energy = -1731.819025 a.u.

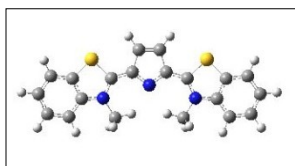

1 3

|   |             |             |             |
|---|-------------|-------------|-------------|
| C | -1.07931900 | 0.88076700  | -0.01620100 |
| C | -0.66659000 | 2.30072900  | -0.00785100 |
| C | 0.66659000  | 2.30072900  | 0.00785500  |
| C | 1.07931900  | 0.88076600  | 0.01620600  |
| C | 2.41888000  | 0.49018100  | 0.03521500  |
| C | 4.89664700  | 0.46739200  | -0.02824700 |
| C | 4.31842200  | -0.80790500 | 0.03531800  |
| N | 2.94210100  | -0.77391500 | 0.08046700  |
| C | 2.17948900  | -2.00979400 | 0.20774400  |
| H | 1.13545500  | -1.76510500 | 0.34513800  |

|   |             |             |             |
|---|-------------|-------------|-------------|
| H | 2.30866100  | -2.60965300 | -0.69329200 |
| H | 2.55322800  | -2.56468500 | 1.06741100  |
| C | -2.41888100 | 0.49018300  | -0.03521300 |
| C | -4.31842200 | -0.80790500 | -0.03531900 |
| C | -4.89664700 | 0.46739200  | 0.02824400  |
| N | -2.94210000 | -0.77391400 | -0.08046500 |
| C | -2.17948700 | -2.00979200 | -0.20773900 |
| H | -2.30866000 | -2.60965000 | 0.69329700  |
| H | -2.55322200 | -2.56468500 | -1.06740600 |
| H | -1.13545300 | -1.76510100 | -0.34513000 |
| N | -0.00000100 | 0.05873900  | 0.00000300  |
| H | -1.32363500 | 3.15566300  | -0.01711500 |
| H | 1.32363600  | 3.15566200  | 0.01711600  |
| C | -6.27596900 | 0.63079600  | 0.07414400  |
| C | -5.12211400 | -1.94887300 | -0.05133600 |
| C | -6.49080600 | -1.77782400 | -0.00395000 |
| C | -7.06555300 | -0.50258600 | 0.05714400  |
| H | -6.71478200 | 1.61719200  | 0.12176500  |
| H | -8.14088000 | -0.40328500 | 0.09250400  |
| H | -7.13200800 | -2.64779800 | -0.01321500 |
| H | -4.68792000 | -2.93687100 | -0.09419700 |
| C | 5.12211500  | -1.94887200 | 0.05133500  |
| C | 6.27596900  | 0.63079700  | -0.07415000 |
| C | 7.06555200  | -0.50258400 | -0.05715000 |
| C | 6.49080700  | -1.77782200 | 0.00394600  |
| H | 4.68792200  | -2.93687100 | 0.09419700  |
| H | 7.13201000  | -2.64779600 | 0.01321000  |
| H | 8.14088000  | -0.40328300 | -0.09251400 |
| H | 6.71478100  | 1.61719400  | -0.12177200 |
| S | 3.67775000  | 1.68931400  | -0.03615600 |
| S | -3.67775100 | 1.68931500  | 0.03615600  |

#### Compound 4d (Protonated)

Absolute Energy = -1732.160618 a.u.

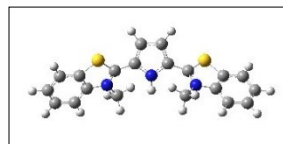

2 1

|   |             |             |             |
|---|-------------|-------------|-------------|
| C | 1.11484500  | 0.99525600  | 0.00161100  |
| C | 0.70178200  | 2.31236700  | -0.00873900 |
| C | -0.70178300 | 2.31236700  | 0.00873200  |
| C | -1.11484500 | 0.99525600  | -0.00160900 |
| C | -2.48303200 | 0.50878800  | 0.03983400  |
| C | -4.86109300 | 0.17797300  | 0.52377600  |
| C | -4.36210500 | -0.68432600 | -0.45364600 |
| N | -3.00943500 | -0.45050200 | -0.70912400 |
| C | -2.31709800 | -1.15098400 | -1.79254500 |

|   |             |             |             |
|---|-------------|-------------|-------------|
| H | -1.39607300 | -0.62854500 | -2.02832400 |
| H | -2.11671600 | -2.18054700 | -1.50006300 |
| H | -2.96019300 | -1.14342900 | -2.66914000 |
| C | 2.48303200  | 0.50878900  | -0.03983300 |
| C | 4.36210600  | -0.68432300 | 0.45364800  |
| C | 4.86109100  | 0.17797100  | -0.52378000 |
| N | 3.00943700  | -0.45049700 | 0.70913000  |
| C | 2.31710300  | -1.15097200 | 1.79255700  |
| H | 2.11671800  | -2.18053600 | 1.50008100  |
| H | 2.96020100  | -1.14341400 | 2.66914900  |
| H | 1.39607900  | -0.62853100 | 2.02833600  |
| N | 0.00000000  | 0.19575200  | 0.00000400  |
| H | 1.34899400  | 3.17368300  | -0.00559300 |
| H | -1.34899600 | 3.17368200  | 0.00558000  |
| C | 6.19667800  | 0.12961300  | -0.91542200 |
| C | 5.17943500  | -1.62930000 | 1.07011500  |
| C | 6.50032300  | -1.67430300 | 0.67705100  |
| C | 7.00386900  | -0.80543900 | -0.30220700 |
| H | 6.58440400  | 0.79811600  | -1.67073200 |
| H | 8.04566700  | -0.87076000 | -0.58245800 |
| H | 7.16285700  | -2.39544000 | 1.13426600  |
| H | 4.80083300  | -2.30524700 | 1.82338200  |
| C | -5.17943200 | -1.62930700 | -1.07011000 |
| C | -6.19668100 | 0.12961800  | 0.91541400  |
| C | -7.00387000 | -0.80543800 | 0.30220100  |
| C | -6.50032200 | -1.67430700 | -0.67705000 |
| H | -4.80082800 | -2.30525800 | -1.82337200 |
| H | -7.16285400 | -2.39544600 | -1.13426300 |
| H | -8.04566900 | -0.87075700 | 0.58244900  |
| H | -6.58441000 | 0.79812500  | 1.67071900  |
| S | -3.60248000 | 1.20927400  | 1.10783300  |
| S | 3.60247700  | 1.20926800  | -1.10783900 |
| H | 0.00000100  | -0.81144000 | 0.00000800  |

|    |             |             |             |
|----|-------------|-------------|-------------|
| N  | 2.98931600  | 0.40738800  | 0.78697900  |
| C  | 2.35699600  | -0.14715400 | 1.98645600  |
| H  | 1.40917700  | 0.35271100  | 2.15038200  |
| H  | 2.19160800  | -1.21539100 | 1.85412200  |
| H  | 3.02556900  | 0.03152100  | 2.82640400  |
| C  | -2.44331800 | 1.29963200  | 0.02486800  |
| C  | -4.32201700 | 0.11398300  | -0.49276700 |
| C  | -4.80046500 | 0.87079500  | 0.57504700  |
| N  | -2.98952000 | 0.40652700  | -0.78677300 |
| C  | -2.35675800 | -0.14798400 | -1.98603800 |
| H  | -2.19102800 | -1.21615300 | -1.85357300 |
| H  | -3.02524900 | 0.03029500  | -2.82613300 |
| H  | -1.40906000 | 0.35213300  | -2.14983000 |
| N  | -0.00028600 | 0.97511600  | -0.00033800 |
| H  | -1.35288900 | 3.99195100  | 0.01748200  |
| H  | 1.35173400  | 3.99220900  | -0.01401000 |
| C  | -6.11555300 | 0.74424800  | 1.01159400  |
| C  | -5.13782200 | -0.79952700 | -1.15393300 |
| C  | -6.43964200 | -0.92463700 | -0.71405700 |
| C  | -6.92447000 | -0.16064800 | 0.35459300  |
| H  | -6.48731400 | 1.33059300  | 1.83956000  |
| H  | -7.94927900 | -0.28500400 | 0.67410600  |
| H  | -7.09677700 | -1.62978100 | -1.20253000 |
| H  | -4.76425900 | -1.39810600 | -1.97208100 |
| C  | 5.13796500  | -0.79818600 | 1.15371800  |
| C  | 6.11439900  | 0.74458600  | -1.01313600 |
| C  | 6.92375200  | -0.15985600 | -0.35606700 |
| C  | 6.43956600  | -0.92335500 | 0.71324200  |
| H  | 4.76489000  | -1.39637900 | 1.97237200  |
| H  | 7.09704400  | -1.62815900 | 1.20174400  |
| H  | 7.94841600  | -0.28424700 | -0.67602900 |
| H  | 6.48566000  | 1.33053400  | -1.84160800 |
| S  | 3.53603800  | 1.87711100  | -1.19933000 |
| S  | -3.53746700 | 1.87721400  | 1.19854400  |
| Au | 0.00040300  | -1.12005200 | 0.00005300  |
| Cl | 0.00170900  | -3.39192200 | 0.00118700  |

#### Compound 4d complex with AuCl

Absolute Energy = -2327.481549 a.u.

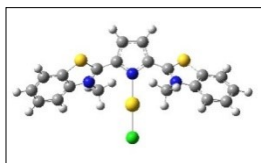

|     |             |            |             |
|-----|-------------|------------|-------------|
| 1 1 |             |            |             |
| C   | -1.08233800 | 1.79554800 | -0.00474600 |
| C   | -0.69571000 | 3.13828100 | 0.01522200  |
| C   | 0.69466800  | 3.13845800 | -0.01278900 |
| C   | 1.08144000  | 1.79574400 | 0.00530600  |
| C   | 2.44261700  | 1.29994900 | -0.02485900 |
| C   | 4.79949900  | 0.87119200 | -0.57599300 |
| C   | 4.32171600  | 0.11487100 | 0.49246700  |

#### Compound 4d + Hydride ion

Absolute Energy = -1732.647197 a.u.

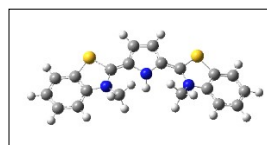

|     |             |             |            |
|-----|-------------|-------------|------------|
| 0 1 |             |             |            |
| C   | -1.15003000 | -1.03569000 | 0.26852700 |
| C   | -0.67383900 | -2.39841600 | 0.29739900 |
| C   | 0.67383600  | -2.39842800 | 0.29740600 |
| C   | 1.15004600  | -1.03571000 | 0.26852000 |
| C   | 2.43048200  | -0.61533800 | 0.21206200 |

|   |             |             |             |
|---|-------------|-------------|-------------|
| C | 4.88329300  | -0.38431900 | -0.27558600 |
| C | 4.23146800  | 0.83876700  | -0.07750800 |
| N | 2.89109500  | 0.70532400  | 0.24063200  |
| C | 2.19409800  | 1.76870200  | 0.93802300  |
| H | 1.38983900  | 1.34215800  | 1.52846400  |
| H | 2.89100100  | 2.27757400  | 1.60561700  |
| H | 1.77721300  | 2.50524800  | 0.24614500  |
| C | -2.43046600 | -0.61531300 | 0.21207600  |
| C | -4.23147600 | 0.83876300  | -0.07750500 |
| C | -4.88328100 | -0.38433000 | -0.27559600 |
| N | -2.89110200 | 0.70534300  | 0.24063700  |
| C | -2.19414900 | 1.76876500  | 0.93800400  |
| H | -1.77752700 | 2.50544100  | 0.24610700  |
| H | -2.89100700 | 2.27746400  | 1.60578100  |
| H | -1.38970700 | 1.34230100  | 1.52825000  |
| N | 0.00001600  | -0.19414400 | 0.31727300  |
| H | -1.31632500 | -3.26425300 | 0.33214000  |
| H | 1.31630800  | -3.26427500 | 0.33215200  |
| C | -6.22875800 | -0.43289200 | -0.57492100 |
| C | -4.94035100 | 2.02703200  | -0.17759300 |
| C | -6.29875500 | 1.97452900  | -0.48207300 |
| C | -6.93939000 | 0.76242000  | -0.68065900 |
| H | -6.72406200 | -1.38336300 | -0.71900100 |
| H | -7.99357400 | 0.73772800  | -0.91743700 |
| H | -6.85580100 | 2.89746500  | -0.56660300 |
| H | -4.44452300 | 2.97728800  | -0.03560900 |
| C | 4.94032400  | 2.02704600  | -0.17761800 |
| C | 6.22877300  | -0.43286300 | -0.57490200 |
| C | 6.93938800  | 0.76245800  | -0.68064800 |
| C | 6.29873100  | 1.97456000  | -0.48208500 |
| H | 4.44447900  | 2.97729700  | -0.03566300 |
| H | 6.85576200  | 2.89750400  | -0.56663000 |
| H | 7.99357400  | 0.73777900  | -0.91741900 |
| H | 6.72409100  | -1.38332800 | -0.71897000 |
| S | 3.78287600  | -1.72851900 | -0.04845600 |
| S | -3.78284400 | -1.72851100 | -0.04845800 |
| H | 0.00002300  | 0.55834300  | -0.35843800 |

**Compound 4d (ASE)**

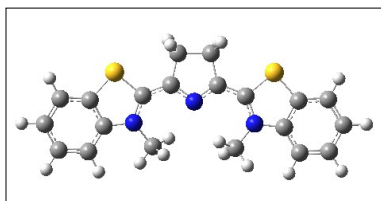

**Absolute Energy = -1733.066263 a.u.**

1 1

|   |             |             |             |
|---|-------------|-------------|-------------|
| C | -1.08553900 | 1.04428900  | -0.03124900 |
| C | -0.76958300 | 2.52616800  | 0.03729700  |
| C | 0.76957500  | 2.52617100  | -0.03723300 |
| C | 1.08553700  | 1.04429300  | 0.03131700  |
| C | 2.39417800  | 0.54515600  | 0.04911200  |
| C | 4.85766000  | 0.33180300  | -0.06780500 |
| C | 4.19619000  | -0.88560600 | 0.09784200  |
| N | 2.81272900  | -0.72827000 | 0.18830300  |
| C | 1.91521100  | -1.83961500 | 0.46933300  |
| H | 1.16265900  | -1.51500100 | 1.18044800  |
| H | 1.41961300  | -2.17236600 | -0.44145500 |
| H | 2.49471500  | -2.65100100 | 0.89543800  |
| C | -2.39417800 | 0.54515000  | -0.04906900 |
| C | -4.19618900 | -0.88561500 | -0.09784800 |
| C | -4.85766400 | 0.33179800  | 0.06775200  |
| N | -2.81272300 | -0.72828100 | -0.18824500 |
| C | -1.91517500 | -1.83962600 | -0.46918200 |
| H | -1.41951100 | -2.17223100 | 0.44162200  |
| H | -2.49466700 | -2.65109400 | -0.89514400 |
| H | -1.16267500 | -1.51507600 | -1.18038300 |
| N | 0.00000000  | 0.27784500  | 0.00003300  |
| H | -1.22965600 | 3.08352000  | -0.77843500 |
| H | 1.22964600  | 3.08352600  | 0.77849800  |
| C | -6.24018500 | 0.39854400  | 0.16282200  |
| C | -4.91830600 | -2.07364900 | -0.15375100 |
| C | -6.29662400 | -2.00446000 | -0.05628700 |
| C | -6.95479000 | -0.78387900 | 0.09670900  |
| H | -6.74133800 | 1.34792300  | 0.28774500  |
| H | -8.03246700 | -0.76095000 | 0.16992700  |
| H | -6.87223800 | -2.91825000 | -0.09594300 |
| H | -4.42889100 | -3.03040500 | -0.25652500 |
| C | 4.91830300  | -2.07364400 | 0.15373100  |
| C | 6.24017800  | 0.39854200  | -0.16293500 |
| C | 6.95478100  | -0.78388400 | -0.09683500 |
| C | 6.29661700  | -2.00446100 | 0.05620600  |
| H | 4.42888400  | -3.03039400 | 0.25653700  |
| H | 6.87223100  | -2.91825200 | 0.09584800  |
| H | 8.03245500  | -0.76095900 | -0.17010000 |
| H | 6.74133000  | 1.34791600  | -0.28789300 |
| S | 3.71769100  | 1.63941200  | -0.13743900 |
| S | -3.71769700 | 1.63940800  | 0.13741200  |
| H | 1.13188400  | 2.95903600  | -0.97228000 |
| H | -1.13189200 | 2.95903400  | 0.97234200  |

**Compound 4e (Singlet)**

**Absolute Energy = -287.751107 a.u.**

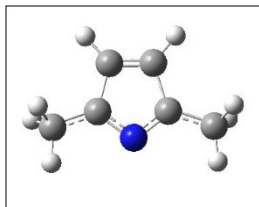

1 1

|   |             |             |             |
|---|-------------|-------------|-------------|
| C | 1.05779700  | 0.14978700  | -0.00007100 |
| C | 0.66090700  | -1.31458300 | 0.00005600  |
| C | -0.66092200 | -1.31457700 | 0.00003100  |
| C | -1.05780000 | 0.14977300  | -0.00006400 |
| N | 0.00000500  | 0.95598400  | -0.00011300 |
| H | 1.35671000  | -2.13862900 | 0.00012700  |
| H | -1.35672800 | -2.13862100 | 0.00008200  |
| C | 2.42651700  | 0.62011000  | -0.00001500 |
| H | 2.94135700  | 0.18012200  | 0.86583800  |
| H | 2.94206200  | 0.17906500  | -0.86486800 |
| H | 2.49841500  | 1.70157000  | -0.00053900 |
| C | -2.42650800 | 0.62012300  | -0.00002000 |
| H | -2.49838500 | 1.70158400  | -0.00081200 |
| H | -2.94223200 | 0.17881000  | -0.86461800 |
| H | -2.94118800 | 0.18041500  | 0.86608200  |

**Compound 4e (triplet)**

**Absolute Energy = -287.713633 a.u.**

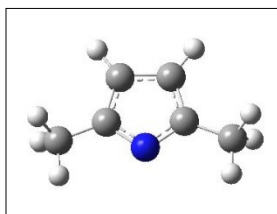

1 3

|   |             |             |             |
|---|-------------|-------------|-------------|
| C | -1.10303300 | -0.09404700 | -0.00003500 |
| C | -0.72288700 | 1.27784900  | -0.00001300 |
| C | 0.72288700  | 1.27784900  | -0.00002400 |
| C | 1.10303300  | -0.09404700 | -0.00003700 |
| N | 0.00000000  | -0.88226600 | -0.00008400 |
| H | -1.37377100 | 2.13896200  | -0.00001700 |
| H | 1.37377100  | 2.13896200  | -0.00003900 |
| C | -2.46789700 | -0.64301000 | 0.00002800  |
| H | -3.01472600 | -0.28454700 | 0.87636800  |
| H | -3.01536400 | -0.28339700 | -0.87542400 |
| H | -2.44207700 | -1.72783700 | -0.00063000 |
| C | 2.46789700  | -0.64301000 | 0.00005100  |
| H | 2.44207700  | -1.72783700 | -0.00097000 |
| H | 3.01553500  | -0.28307900 | -0.87515800 |
| H | 3.01455500  | -0.28486600 | 0.87663400  |

**Compound 4e (Protonated)**

**Absolute Energy = -287.911894 a.u.**

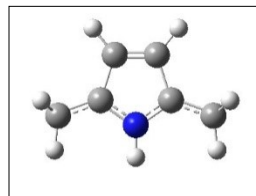

2 1

|   |             |             |             |
|---|-------------|-------------|-------------|
| C | -1.11287800 | -0.10233900 | -0.00005100 |
| C | -0.66628800 | 1.31880700  | 0.00008900  |
| C | 0.66629100  | 1.31880600  | 0.00008500  |
| C | 1.11287900  | -0.10233500 | -0.00008200 |
| N | -0.00000200 | -0.87971700 | -0.00012500 |
| H | -1.35157100 | 2.15562300  | 0.00017400  |
| H | 1.35157400  | 2.15562300  | 0.00016300  |
| C | -2.45446500 | -0.58823500 | -0.00003500 |
| H | -2.98112700 | -0.11489800 | 0.85422200  |
| H | -2.98178200 | -0.11397100 | -0.85331500 |
| H | -2.56984400 | -1.66774300 | -0.00047100 |
| C | 2.45446300  | -0.58823800 | -0.00005400 |
| H | 2.56983800  | -1.66774700 | -0.00068700 |
| H | 2.98195200  | -0.11375500 | -0.85308900 |
| H | 2.98095900  | -0.11512400 | 0.85444600  |
| H | 0.00000000  | -1.89877600 | -0.00027600 |

**Compound 10 complex with AuCl**

**Absolute Energy = -883.312107 a.u.**

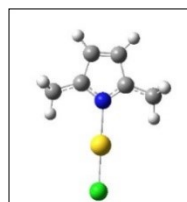

1 1

|   |             |             |             |
|---|-------------|-------------|-------------|
| C | -2.13706100 | -1.07462300 | -0.00008300 |
| C | -3.58628200 | -0.66211800 | 0.00015000  |
| C | -3.58642800 | 0.66164500  | 0.00017400  |
| C | -2.13727500 | 1.07448700  | -0.00006900 |
| N | -1.33741400 | 0.00003500  | -0.00019900 |
| H | -4.41185500 | -1.35653400 | 0.00025500  |
| H | -4.41216000 | 1.35587300  | 0.00030500  |

|    |             |             |             |
|----|-------------|-------------|-------------|
| C  | -1.66612600 | -2.43614200 | -0.00002600 |
| H  | -2.11571800 | -2.95009500 | 0.86434400  |
| H  | -2.11682200 | -2.95079900 | -0.86336200 |
| H  | -0.58349900 | -2.52055500 | -0.00057100 |
| C  | -1.66663600 | 2.43611300  | -0.00006100 |
| H  | -0.58402400 | 2.52073200  | -0.00096100 |
| H  | -2.11777400 | 2.95083200  | -0.86311100 |
| H  | -2.11595300 | 2.94982600  | 0.86460500  |
| Au | 0.81784100  | 0.00007800  | -0.00004800 |
| Cl | 3.05230100  | -0.00010700 | 0.00018600  |

### Compound 4e + Hydride ion

Absolute Energy = -288.678218 a.u.

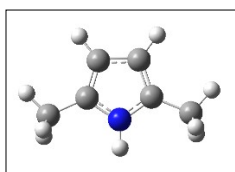

|     |             |             |             |
|-----|-------------|-------------|-------------|
| 0 1 |             |             |             |
| C   | 1.12895400  | -0.02174000 | -0.00004300 |
| C   | 0.71228900  | 1.28208900  | -0.00002600 |
| C   | -0.71222100 | 1.28210700  | 0.00002700  |
| C   | -1.12896100 | -0.02177200 | 0.00003100  |
| N   | -0.00000500 | -0.80208200 | -0.00001100 |
| H   | 1.36227600  | 2.14117400  | 0.00002300  |
| H   | -1.36215600 | 2.14123100  | -0.00001800 |
| C   | 2.49465900  | -0.61639300 | 0.00002000  |
| H   | 3.23793200  | 0.17777200  | -0.00037300 |
| H   | 2.66693000  | -1.23574400 | 0.88264300  |
| H   | 2.66671600  | -1.23640500 | -0.88217600 |
| C   | -2.49470900 | -0.61634900 | -0.00000700 |
| H   | -2.66707300 | -1.23566400 | -0.88263400 |
| H   | -2.66677100 | -1.23638900 | 0.88217300  |
| H   | -3.23792300 | 0.17786800  | 0.00044900  |
| H   | 0.00003700  | -1.80691600 | -0.00001200 |

### Compound 4e (ASE)

Absolute Energy = -288.996187 a.u.

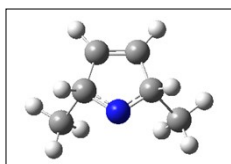

|     |            |            |             |
|-----|------------|------------|-------------|
| 1 1 |            |            |             |
| C   | 1.09022800 | 0.10344300 | 0.41831100  |
| C   | 0.62629400 | 1.35369000 | -0.23099700 |

|   |             |             |             |
|---|-------------|-------------|-------------|
| C | -0.71240900 | 1.34601300  | -0.20093300 |
| C | -1.13238400 | 0.08426400  | 0.45685100  |
| N | -0.00868200 | -0.60061700 | 0.86974100  |
| H | 1.27083100  | 2.10199800  | -0.66494600 |
| H | -1.38548100 | 2.08423100  | -0.60828300 |
| H | -1.86156300 | 0.12247800  | 1.27859500  |
| H | 1.74585700  | 0.20465900  | 1.30498000  |
| C | -1.88720100 | -0.95918800 | -0.52191600 |
| H | -2.13044000 | -1.85328900 | 0.03975500  |
| H | -2.77958800 | -0.43063000 | -0.84333900 |
| H | -1.24670400 | -1.18022600 | -1.36832500 |
| C | 1.99337100  | -0.87209300 | -0.46411800 |
| H | 2.82403800  | -0.25531400 | -0.79673800 |
| H | 2.33176800  | -1.70235500 | 0.14434900  |
| H | 1.42466300  | -1.22400000 | -1.31742400 |

### Compound 4f (Singlet)

Absolute Energy = -817.577542 a.u.

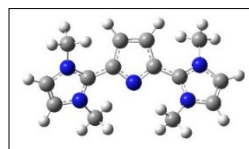

|     |             |             |             |
|-----|-------------|-------------|-------------|
| 1 1 |             |             |             |
| C   | 1.06860100  | -0.58215700 | -0.03161100 |
| C   | 0.69108200  | -1.94260800 | -0.01690700 |
| C   | -0.69108200 | -1.94260800 | 0.01690000  |
| C   | -1.06860200 | -0.58215700 | 0.03161000  |
| C   | -2.39750900 | -0.03180600 | 0.09435100  |
| C   | -4.59411900 | 0.23482700  | -0.12013600 |
| C   | -4.10395400 | 1.33379200  | 0.48945500  |
| H   | -5.59663800 | -0.02682800 | -0.40463300 |
| H   | -4.59527200 | 2.22069200  | 0.84503500  |
| N   | -2.74525400 | 1.15528600  | 0.62182100  |
| N   | -3.52738300 | -0.60070700 | -0.36590700 |
| C   | -1.85154000 | 2.10544400  | 1.27258100  |
| H   | -1.14550200 | 1.56344300  | 1.89340800  |
| H   | -1.29857300 | 2.67015500  | 0.52729800  |
| H   | -2.45986100 | 2.76989400  | 1.87947500  |
| C   | -3.62659500 | -1.87591000 | -1.06072300 |
| H   | -3.67715500 | -2.69666400 | -0.34811800 |
| H   | -4.53001300 | -1.86365900 | -1.66323700 |
| H   | -2.75860700 | -2.00109400 | -1.70256100 |
| C   | 2.39750900  | -0.03180600 | -0.09435000 |
| C   | 4.10395500  | 1.33379100  | -0.48945400 |
| C   | 4.59411900  | 0.23482600  | 0.12013900  |
| H   | 4.59527400  | 2.22069000  | -0.84503500 |
| H   | 5.59663700  | -0.02682900 | 0.40463800  |
| N   | 3.52738200  | -0.60070700 | 0.36591000  |
| N   | 2.74525500  | 1.15528500  | -0.62182200 |

|   |             |             |             |
|---|-------------|-------------|-------------|
| C | 3.62659300  | -1.87590900 | 1.06072800  |
| H | 2.75860000  | -2.00109600 | 1.70255700  |
| H | 3.67716300  | -2.69666300 | 0.34812400  |
| H | 4.53000500  | -1.86365400 | 1.66325000  |
| C | 1.85154200  | 2.10544100  | -1.27258400 |
| H | 1.29857600  | 2.67015500  | -0.52730300 |
| H | 2.45986300  | 2.76989000  | -1.87948000 |
| H | 1.14550300  | 1.56343900  | -1.89340900 |
| N | 0.00000000  | 0.24048100  | 0.00000000  |
| H | 1.32888200  | -2.80914300 | -0.05582300 |
| H | -1.32888200 | -2.80914400 | 0.05581300  |

|   |             |             |             |
|---|-------------|-------------|-------------|
| H | 3.26703300  | -2.56794000 | 1.00931300  |
| H | 3.35656100  | -2.66794000 | -0.76924100 |
| H | 4.82021900  | -2.38554400 | 0.18254600  |
| C | 1.84803600  | 2.43451700  | -0.14109200 |
| H | 1.19982500  | 2.47007000  | 0.72955800  |
| H | 2.46814300  | 3.32565300  | -0.18330300 |
| H | 1.23126800  | 2.36706700  | -1.03313400 |
| N | 0.00000000  | 0.26917600  | 0.00000000  |
| H | 1.29273300  | -2.84140900 | 0.00235300  |
| H | -1.29273200 | -2.84141000 | -0.00235300 |

### Compound 4f (Triplet)

Absolute Energy = -817.477179 a.u.

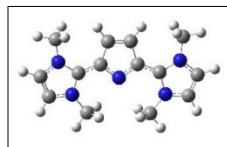

|     |             |             |             |
|-----|-------------|-------------|-------------|
| 1 3 |             |             |             |
| C   | 1.08972800  | -0.55158800 | 0.00280100  |
| C   | 0.66822700  | -1.96705200 | 0.00286500  |
| C   | -0.66822600 | -1.96705200 | -0.00286600 |
| C   | -1.08972900 | -0.55158800 | -0.00280100 |
| C   | -2.38824700 | -0.04838500 | 0.00986300  |
| C   | -4.62138300 | 0.14478100  | -0.00510900 |
| C   | -4.10119300 | 1.39488700  | 0.05225300  |
| H   | -5.64573600 | -0.17959600 | -0.03123400 |
| H   | -4.59624500 | 2.34812100  | 0.08921500  |
| N   | -2.73997300 | 1.28953400  | 0.05959900  |
| N   | -3.58440700 | -0.74364000 | -0.03160700 |
| C   | -1.84803400 | 2.43451600  | 0.14109200  |
| H   | -1.23126700 | 2.36706600  | 1.03313400  |
| H   | -1.19982400 | 2.47006900  | -0.72955800 |
| H   | -2.46814100 | 3.32565300  | 0.18330300  |
| C   | -3.75628100 | -2.17913300 | -0.11778500 |
| H   | -3.35656300 | -2.66793900 | 0.76924100  |
| H   | -4.82022100 | -2.38554200 | -0.18254500 |
| H   | -3.26703600 | -2.56794000 | -1.00931300 |
| C   | 2.38824600  | -0.04838500 | -0.00986300 |
| C   | 4.10119400  | 1.39488600  | -0.05225300 |
| C   | 4.62138300  | 0.14478000  | 0.00510900  |
| H   | 4.59624600  | 2.34812000  | -0.08921500 |
| H   | 5.64573600  | -0.17959800 | 0.03123400  |
| N   | 3.58440600  | -0.74364000 | 0.03160700  |
| N   | 2.73997400  | 1.28953400  | -0.05959900 |
| C   | 3.75627900  | -2.17913400 | 0.11778500  |

### Compound 4f (Protonated)

Absolute Energy = -817.852413 a.u.

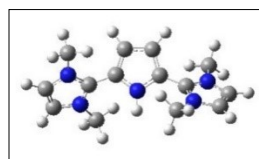

|     |             |             |             |
|-----|-------------|-------------|-------------|
| 2 1 |             |             |             |
| C   | -1.11547200 | 0.03920500  | 0.52578600  |
| C   | -0.70343200 | 0.02345400  | 1.84019000  |
| C   | 0.70343200  | -0.02345700 | 1.84019000  |
| C   | 1.11547200  | -0.03920600 | 0.52578600  |
| C   | 2.47138500  | -0.09353100 | 0.00059600  |
| C   | 4.61744000  | 0.32936400  | -0.30088000 |
| C   | 4.28810600  | -0.72122700 | -1.08992500 |
| H   | 5.55597100  | 0.83550700  | -0.15872200 |
| H   | 4.88403500  | -1.30862100 | -1.76596700 |
| N   | 2.95550000  | -0.97583400 | -0.88674300 |
| N   | 3.48018800  | 0.70966400  | 0.36466700  |
| C   | 2.21773100  | -2.07502100 | -1.50807300 |
| H   | 1.40370200  | -2.37146000 | -0.85257700 |
| H   | 1.83622600  | -1.77145200 | -2.48086000 |
| H   | 2.89546300  | -2.91396500 | -1.63503500 |
| C   | 3.41955100  | 1.81266600  | 1.32648500  |
| H   | 3.71459700  | 1.45932400  | 2.31174000  |
| H   | 4.10252700  | 2.58943400  | 0.99610300  |
| H   | 2.40745600  | 2.20328300  | 1.35919900  |
| C   | -2.47138500 | 0.09353100  | 0.00059600  |
| C   | -4.28810600 | 0.72122800  | -1.08992400 |
| C   | -4.61744000 | -0.32936400 | -0.30088000 |
| H   | -4.88403500 | 1.30862400  | -1.76596500 |
| H   | -5.55597100 | -0.83550700 | -0.15872400 |
| N   | -3.48018800 | -0.70966500 | 0.36466500  |
| N   | -2.95550000 | 0.97583500  | -0.88674100 |
| C   | -3.41955100 | -1.81266800 | 1.32648200  |
| H   | -2.40745600 | -2.20328600 | 1.35919500  |
| H   | -3.71459700 | -1.45932800 | 2.31173700  |
| H   | -4.10252700 | -2.58943600 | 0.99609900  |



|   |             |             |             |
|---|-------------|-------------|-------------|
| C | -2.21773000 | 2.07502400  | -1.50807000 |
| H | -1.83622600 | 1.77145600  | -2.48085700 |
| H | -2.89546300 | 2.91396800  | -1.63503000 |
| H | -1.40370200 | 2.37146200  | -0.85257300 |
| N | 0.00000000  | 0.00000000  | -0.27118400 |
| H | -1.34585500 | 0.05972300  | 2.70414500  |
| H | 1.34585500  | -0.05972800 | 2.70414500  |
| H | 0.00000000  | 0.00000100  | -1.27886000 |

|    |             |             |             |
|----|-------------|-------------|-------------|
| H  | 3.06650200  | -0.16694700 | -3.18007500 |
| H  | 1.50052300  | -0.72710200 | -2.53413000 |
| N  | -0.00002100 | -0.86757000 | 0.00007900  |
| H  | 1.35257800  | -3.90069100 | -0.05838800 |
| H  | -1.35278900 | -3.90063900 | 0.05722500  |
| Au | 0.00009400  | 1.20488600  | 0.00006700  |
| Cl | -0.00006100 | 3.50956100  | -0.00015900 |

### Compound 4f complex with AuCl

Absolute Energy = -1413.169538 a.u.

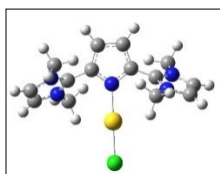

|     |             |             |             |
|-----|-------------|-------------|-------------|
| 1 1 |             |             |             |
| C   | 1.09681900  | -1.68970100 | -0.04321500 |
| C   | 0.70155600  | -3.03641800 | -0.02333300 |
| C   | -0.70172300 | -3.03638400 | 0.02254700  |
| C   | -1.09691700 | -1.68965100 | 0.04303800  |
| C   | -2.45126000 | -1.14984800 | 0.09935300  |
| C   | -4.55810200 | -0.64722400 | -0.44352900 |
| C   | -4.30262700 | -0.10754100 | 0.78058200  |
| H   | -5.44915700 | -0.62620800 | -1.05231100 |
| H   | -4.92786600 | 0.47680600  | 1.43836900  |
| N   | -3.00292700 | -0.43547000 | 1.10917200  |
| N   | -3.40471300 | -1.28682900 | -0.85474100 |
| C   | -2.34555400 | -0.05993600 | 2.36737800  |
| H   | -1.50056500 | -0.72736600 | 2.53419300  |
| H   | -1.98947700 | 0.97176600  | 2.30833600  |
| H   | -3.06659000 | -0.16743300 | 3.18022200  |
| C   | -3.25083300 | -1.96873600 | -2.14452000 |
| H   | -3.81357200 | -2.90594500 | -2.14023800 |
| H   | -3.62397000 | -1.31605700 | -2.93671000 |
| H   | -2.19437400 | -2.17873600 | -2.30756400 |
| C   | 2.45118400  | -1.14991500 | -0.09936000 |
| C   | 4.30253500  | -0.10743500 | -0.78034900 |
| C   | 4.55799200  | -0.64733300 | 0.44367300  |
| H   | 4.92776700  | 0.47706800  | -1.43800300 |
| H   | 5.44902200  | -0.62638600 | 1.05249500  |
| N   | 3.40463100  | -1.28710400 | 0.85470500  |
| N   | 3.00288100  | -0.43541300 | -1.10906500 |
| C   | 3.25073100  | -1.96917800 | 2.14439500  |
| H   | 2.19444300  | -2.18065100 | 2.30663000  |
| H   | 3.81476900  | -2.90560500 | 2.14051800  |
| H   | 3.62236400  | -1.31597900 | 2.93686900  |
| C   | 2.34548000  | -0.05966300 | -2.36719100 |
| H   | 1.98935800  | 0.97201100  | -2.30791300 |

### Compound 4f + Hydride ion

Absolute Energy = -818.259149 a.u.

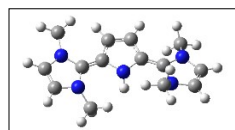

|     |             |             |             |
|-----|-------------|-------------|-------------|
| 0 1 |             |             |             |
| C   | 1.16265200  | 0.56885800  | 0.02287500  |
| C   | 0.66711300  | 1.92333000  | 0.08165200  |
| C   | -0.68232100 | 1.91042000  | 0.01312700  |
| C   | -1.15636300 | 0.54894600  | -0.09257000 |
| C   | -2.41872500 | 0.03966700  | -0.04668300 |
| C   | -4.67383800 | -0.17213800 | 0.09382700  |
| C   | -4.18114300 | -1.39321900 | -0.12615400 |
| H   | -5.68711600 | 0.15228400  | 0.24726700  |
| H   | -4.68488100 | -2.33709600 | -0.22573000 |
| N   | -2.78469200 | -1.30814300 | -0.18301600 |
| N   | -3.61655500 | 0.72650300  | 0.14493900  |
| C   | -2.02540100 | -2.25798700 | -0.96607700 |
| H   | -1.77676900 | -1.84453300 | -1.94979400 |
| H   | -1.11195700 | -2.55526600 | -0.45676400 |
| H   | -2.63787500 | -3.14466300 | -1.11363100 |
| C   | -3.73110600 | 2.09470600  | 0.56348400  |
| H   | -3.47780200 | 2.78755300  | -0.24163900 |
| H   | -4.75979400 | 2.27858500  | 0.86485700  |
| H   | -3.07363600 | 2.29117800  | 1.41321100  |
| C   | 2.41833700  | 0.05930200  | 0.07230200  |
| C   | 4.14003300  | -1.41470000 | 0.04801100  |
| C   | 4.65561800  | -0.19689600 | -0.12320700 |
| H   | 4.63012600  | -2.37006900 | 0.10445200  |
| H   | 5.67450300  | 0.10627500  | -0.28811500 |
| N   | 3.63061200  | 0.74499700  | -0.07180900 |
| N   | 2.73964000  | -1.31281800 | 0.16213900  |
| C   | 3.72735800  | 2.06973500  | -0.61997700 |
| H   | 3.03807100  | 2.18313600  | -1.46261400 |
| H   | 3.49098500  | 2.83408000  | 0.12210900  |
| H   | 4.74514500  | 2.23459300  | -0.96695100 |
| C   | 2.08213600  | -2.13736200 | 1.16547500  |
| H   | 1.00455000  | -2.07639400 | 1.04508800  |

|   |             |             |             |
|---|-------------|-------------|-------------|
| H | 2.40957200  | -3.16772600 | 1.03522100  |
| H | 2.33696700  | -1.80774000 | 2.17836400  |
| N | 0.01641300  | -0.29800800 | -0.07715700 |
| H | 1.27030700  | 2.80721600  | 0.20193600  |
| H | -1.29894800 | 2.79117200  | 0.04814600  |
| H | 0.10452200  | -0.88627500 | -0.89759200 |

#### Compound 4f (ASE)

Absolute Energy = -818.729284 a.u.

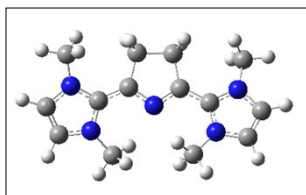

|     |             |             |             |
|-----|-------------|-------------|-------------|
| 1 1 |             |             |             |
| C   | 1.09374800  | -0.59226700 | 0.00249700  |
| C   | 0.77056000  | -2.07815200 | 0.06807200  |
| C   | -0.77055700 | -2.07815600 | -0.06807600 |
| C   | -1.09375200 | -0.59227200 | -0.00250600 |
| C   | -2.37719600 | -0.00200200 | 0.06743600  |
| C   | -4.59242500 | 0.30283700  | -0.01666600 |
| C   | -4.03903500 | 1.45986700  | 0.38660800  |
| H   | -5.61894200 | 0.03489800  | -0.18522600 |
| H   | -4.48789300 | 2.39994100  | 0.64898900  |
| N   | -2.67348100 | 1.26778200  | 0.44561100  |
| N   | -3.56564400 | -0.59993400 | -0.21130200 |
| C   | -1.73484100 | 2.27265900  | 0.90975300  |
| H   | -1.05419200 | 1.83123000  | 1.63261500  |
| H   | -1.15441800 | 2.66573700  | 0.07835200  |
| H   | -2.30600300 | 3.07158000  | 1.37389600  |
| C   | -3.75623900 | -1.91715600 | -0.79777500 |
| H   | -3.38874400 | -2.69688500 | -0.13730800 |
| H   | -4.82127000 | -2.06139500 | -0.95113600 |
| H   | -3.24996500 | -1.97785200 | -1.75892300 |
| C   | 2.37719300  | -0.00199900 | -0.06743700 |
| C   | 4.03904900  | 1.45985500  | -0.38658800 |
| C   | 4.59242400  | 0.30281700  | 0.01668600  |
| H   | 4.48792000  | 2.39992500  | -0.64896000 |
| H   | 5.61893600  | 0.03486600  | 0.18525500  |
| N   | 3.56563100  | -0.59994500 | 0.21130400  |
| N   | 2.67349400  | 1.26778300  | -0.44561000 |
| C   | 3.75620100  | -1.91717600 | 0.79776500  |
| H   | 3.24991600  | -1.97787300 | 1.75890700  |
| H   | 3.38869900  | -2.69689100 | 0.13728600  |
| H   | 4.82122800  | -2.06143400 | 0.95113400  |
| C   | 1.73487300  | 2.27267200  | -0.90976600 |

|   |             |             |             |
|---|-------------|-------------|-------------|
| H | 1.15444200  | 2.66575600  | -0.07837300 |
| H | 2.30605300  | 3.07158600  | -1.37389900 |
| H | 1.05422900  | 1.83125200  | -1.63263900 |
| N | -0.00000400 | 0.15946900  | -0.00000100 |
| H | 1.24306900  | -2.64744100 | -0.73123300 |
| H | -1.24306200 | -2.64744500 | 0.73123200  |
| H | -1.07411400 | -2.52740100 | -1.01377000 |
| H | 1.07412200  | -2.52739100 | 1.01376800  |

#### Compound 5 (Singlet)

Absolute Energy = -321.106550 a.u.

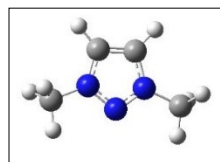

|     |             |             |             |
|-----|-------------|-------------|-------------|
| 1 1 |             |             |             |
| C   | -0.68232500 | -1.24347100 | 0.00066400  |
| C   | 0.68232500  | -1.24347100 | -0.00056800 |
| N   | -1.03436700 | 0.06258700  | 0.00104600  |
| N   | 0.00000000  | 0.85089400  | -0.00009900 |
| N   | 1.03436700  | 0.06258800  | -0.00114800 |
| C   | 2.38442500  | 0.63037300  | 0.00085000  |
| H   | 2.89629700  | 0.31676800  | 0.90634800  |
| H   | 2.91439900  | 0.27782000  | -0.87942600 |
| H   | 2.28224100  | 1.70972900  | -0.02359700 |
| C   | -2.38442600 | 0.63037100  | -0.00078000 |
| H   | -2.89742400 | 0.31425800  | -0.90475900 |
| H   | -2.91330900 | 0.28028200  | 0.88114100  |
| H   | -2.28219800 | 1.70979000  | 0.02054900  |
| H   | -1.40275600 | -2.04197300 | 0.00117100  |
| H   | 1.40275700  | -2.04197100 | -0.00101200 |

#### Compound 5 (triplet)

Absolute Energy = -320.966577 a.u.

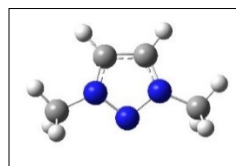

|     |             |             |             |
|-----|-------------|-------------|-------------|
| 1 3 |             |             |             |
| C   | -0.70075900 | -1.21602600 | 0.02881000  |
| C   | 0.70197800  | -1.21774400 | 0.03624400  |
| N   | -1.10726800 | 0.04638200  | -0.17708900 |
| N   | -0.00405600 | 0.89148800  | 0.12477000  |

|   |             |             |             |
|---|-------------|-------------|-------------|
| N | 1.10987200  | 0.03894100  | -0.14740100 |
| C | 2.43238900  | 0.61569300  | 0.02226500  |
| H | 2.54054800  | 1.00347400  | 1.03511200  |
| H | 3.16526900  | -0.16376000 | -0.16521500 |
| H | 2.55751700  | 1.41984700  | -0.69775800 |
| C | -2.43156300 | 0.61204100  | 0.03223900  |
| H | -2.56262000 | 1.44928700  | -0.64713300 |
| H | -3.16331600 | -0.15877300 | -0.19208500 |
| H | -2.53738300 | 0.94791200  | 1.06361700  |
| H | -1.37891600 | -2.04694500 | 0.14177400  |
| H | 1.37679500  | -2.05249900 | 0.14238400  |

### Compound 5 (Protonated)

Absolute Energy = -321.227232 a.u.

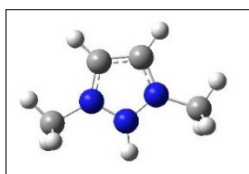

|     |             |             |             |
|-----|-------------|-------------|-------------|
| 2 1 |             |             |             |
| C   | -0.69963800 | -1.25186300 | 0.00006400  |
| C   | 0.69964000  | -1.25186200 | 0.00000100  |
| N   | -1.07580300 | 0.01949700  | 0.00011500  |
| N   | -0.00000100 | 0.77751800  | -0.00016200 |
| N   | 1.07580200  | 0.01949700  | -0.00001800 |
| C   | 2.44138000  | 0.60670500  | -0.00000600 |
| H   | 2.55595800  | 1.20351200  | 0.90338600  |
| H   | 3.13855300  | -0.22627600 | -0.00058500 |
| H   | 2.55552900  | 1.20442400  | -0.90283200 |
| C   | -2.44138000 | 0.60670700  | -0.00006700 |
| H   | -2.55578100 | 1.20359000  | -0.90342400 |
| H   | -3.13854400 | -0.22628400 | 0.00032900  |
| H   | -2.55571400 | 1.20433300  | 0.90280400  |
| H   | -1.40763600 | -2.06841000 | 0.00003300  |
| H   | 1.40764000  | -2.06840700 | -0.00011400 |
| H   | -0.00000100 | 1.79981600  | 0.00090700  |

### Compound 5 complex with AuCl

Absolute Energy = -916.655925 a.u.

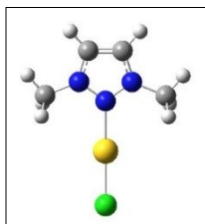

|     |             |             |              |
|-----|-------------|-------------|--------------|
| 1 1 |             |             |              |
| C   | -3.40470500 | -0.68840400 | -0.00008500  |
| C   | -3.40443700 | 0.68910700  | -0.00008000  |
| N   | -2.10132300 | -1.06078900 | 0.00001000   |
| N   | -1.30098300 | -0.00006300 | 0.00003500   |
| N   | -2.10091800 | 1.06100500  | -0.00000900  |
| C   | -1.53328000 | 2.42230600  | 0.00005200   |
| H   | -2.36706500 | 3.12435300  | -0.00008900  |
| H   | -0.92380300 | 2.55249100  | 0.89677800   |
| H   | -0.92352400 | 2.55243600  | -0.89648700  |
| C   | -1.53413900 | -2.42228400 | 0.00003900   |
| H   | -2.36813600 | -3.12407900 | 0.00006600   |
| H   | -0.92458500 | -2.55265000 | -0.89660600  |
| H   | -0.92454100 | -2.55260100 | 0.89665900   |
| H   | -4.21506600 | -1.40267100 | -0.00001300  |
| H   | -4.21453500 | 1.40367200  | -0.000021300 |
| Au  | 0.79315300  | -0.00008900 | 0.00001700   |
| Cl  | 3.05788900  | 0.00003900  | -0.00007200  |

### Compound 5 + Hydride ion

Absolute Energy = -321.859364 a.u.

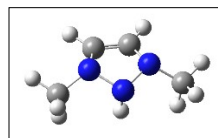

|     |             |             |             |
|-----|-------------|-------------|-------------|
| 0 1 |             |             |             |
| C   | -0.66532600 | 1.23535500  | -0.07609700 |
| C   | 0.66541600  | 1.23535500  | -0.07623700 |
| N   | -1.11233300 | -0.02572600 | 0.38936700  |
| N   | -0.00001000 | -0.90269000 | 0.15388400  |
| N   | 1.11267500  | -0.02570900 | 0.39047500  |
| C   | 2.31392800  | -0.57522100 | -0.18922200 |
| H   | 2.19543400  | -0.76508300 | -1.26734800 |
| H   | 3.12993000  | 0.12925600  | -0.04347100 |
| H   | 2.55752100  | -1.50924000 | 0.31211000  |
| C   | -2.31430700 | -0.57508400 | -0.18882800 |
| H   | -3.12959800 | 0.13013900  | -0.04299800 |
| H   | -2.19683300 | -0.76605900 | -1.26687500 |
| H   | -2.55803700 | -1.50848100 | 0.31358000  |
| H   | -1.35679500 | 2.04424500  | -0.23794600 |
| H   | 1.35685800  | 2.04466900  | -0.23676300 |
| H   | 0.00092400  | -1.04407300 | -0.88406700 |

### Compound 5 (ASE)

Absolute Energy = -322.268002 a.u.

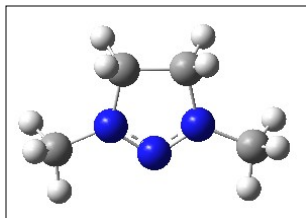

| 1 1 |             |             |             |
|-----|-------------|-------------|-------------|
| C   | 0.76729200  | 1.29155400  | -0.00028800 |
| C   | -0.76729200 | 1.29155300  | 0.00029000  |
| N   | 1.04680900  | -0.15515400 | 0.00057300  |
| N   | 0.00000000  | -0.87218700 | -0.00000500 |
| N   | -1.04680900 | -0.15515400 | -0.00058200 |
| C   | -2.37635300 | -0.74147000 | 0.00004500  |
| H   | -2.91137800 | -0.41645900 | 0.89082100  |
| H   | -2.91268200 | -0.41526300 | -0.88948800 |
| H   | -2.26987800 | -1.82135800 | -0.00076000 |
| C   | 2.37635300  | -0.74147000 | -0.00003800 |
| H   | 2.91137600  | -0.41649900 | -0.89083000 |
| H   | 2.91268500  | -0.41522300 | 0.88947900  |
| H   | 2.26987900  | -1.82135800 | 0.00081600  |
| H   | 1.20418700  | 1.74499000  | -0.88807600 |
| H   | -1.20419100 | 1.74498400  | 0.88808000  |
| H   | 1.20488400  | 1.74632400  | 0.88644500  |
| H   | -1.20488000 | 1.74633100  | -0.88644100 |

### Compound 6 (Singlet)

Absolute Energy = -474.702104 a.u.

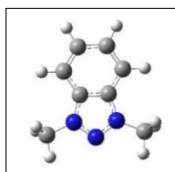

| 1 1 |             |             |            |
|-----|-------------|-------------|------------|
| C   | 0.21396900  | -0.69635300 | 0.00000000 |
| C   | 0.21396900  | 0.69635300  | 0.00000000 |
| C   | 1.39753500  | 1.44091400  | 0.00000000 |
| C   | 2.55879200  | 0.70805900  | 0.00000000 |
| C   | 2.55879200  | -0.70805900 | 0.00000000 |
| C   | 1.39753500  | -1.44091400 | 0.00000000 |
| H   | 1.39861700  | 2.52117800  | 0.00000000 |
| H   | 3.50811900  | 1.22458600  | 0.00000000 |
| H   | 3.50811900  | -1.22458600 | 0.00000000 |
| H   | 1.39861700  | -2.52117800 | 0.00000000 |
| N   | -1.11084200 | 1.04370900  | 0.00000000 |
| N   | -1.88192400 | 0.00000000  | 0.00000000 |
| N   | -1.11084200 | -1.04370900 | 0.00000000 |

|   |             |             |             |
|---|-------------|-------------|-------------|
| C | -1.68305700 | 2.38532000  | 0.00000000  |
| H | -1.35240100 | 2.91099400  | 0.89240700  |
| H | -1.35240000 | 2.91099500  | -0.89240600 |
| H | -2.76273500 | 2.28277900  | -0.00000100 |
| C | -1.68305700 | -2.38532000 | 0.00000000  |
| H | -1.35240100 | -2.91099400 | -0.89240600 |
| H | -1.35240100 | -2.91099500 | 0.89240600  |
| H | -2.76273500 | -2.28277900 | 0.00000000  |

### Compound 6 (triplet)

Absolute Energy = -474.594663 a.u.

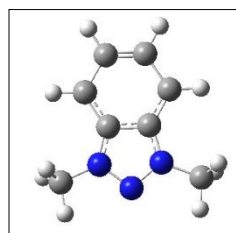

| 1 3 |             |             |             |
|-----|-------------|-------------|-------------|
| C   | 0.17863500  | -0.70069000 | 0.00000000  |
| C   | 0.17863500  | 0.70069000  | 0.00000000  |
| C   | 1.38088700  | 1.43774700  | 0.00000000  |
| C   | 2.62624900  | 0.67173500  | 0.00000000  |
| C   | 2.62624900  | -0.67173500 | 0.00000000  |
| C   | 1.38088700  | -1.43774700 | 0.00000000  |
| H   | 1.38893200  | 2.51702800  | 0.00000000  |
| H   | 3.55615800  | 1.22062100  | 0.00000000  |
| H   | 3.55615800  | -1.22062100 | 0.00000000  |
| H   | 1.38893200  | -2.51702800 | 0.00000000  |
| N   | -1.11126400 | 1.05719000  | 0.00000000  |
| N   | -1.94988000 | 0.00000000  | 0.00000000  |
| N   | -1.11126400 | -1.05719000 | 0.00000000  |
| C   | -1.67000500 | 2.39941900  | 0.00000000  |
| H   | -1.34303900 | 2.92852500  | 0.89282000  |
| H   | -1.34303800 | 2.92852600  | -0.89281900 |
| H   | -2.75018300 | 2.30139700  | -0.00000100 |
| C   | -1.67000500 | -2.39941900 | 0.00000000  |
| H   | -1.34303800 | -2.92852500 | -0.89281900 |
| H   | -1.34303800 | -2.92852500 | 0.89281900  |
| H   | -2.75018300 | -2.30139700 | 0.00000000  |

### Compound 6 (Protonated)

Absolute Energy = -474.844158 a.u.

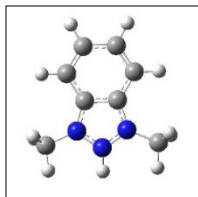

|     |             |             |             |
|-----|-------------|-------------|-------------|
| 2 1 |             |             |             |
| C   | 0.23380800  | -0.71122400 | 0.00000000  |
| C   | 0.23380800  | 0.71122400  | 0.00000000  |
| C   | 1.42307800  | 1.45934300  | 0.00000000  |
| C   | 2.56960900  | 0.71720200  | 0.00000000  |
| C   | 2.56960900  | -0.71720200 | 0.00000000  |
| C   | 1.42307800  | -1.45934300 | 0.00000000  |
| H   | 1.42823800  | 2.54009700  | 0.00000000  |
| H   | 3.52531400  | 1.22484100  | 0.00000000  |
| H   | 3.52531400  | -1.22484100 | 0.00000000  |
| H   | 1.42823800  | -2.54009700 | 0.00000000  |
| N   | -1.06042900 | 1.08256800  | 0.00000000  |
| N   | -1.80384800 | 0.00000000  | 0.00000000  |
| N   | -1.06042900 | -1.08256800 | 0.00000000  |
| C   | -1.64032500 | 2.44042800  | 0.00000000  |
| H   | -1.29902400 | 2.95055700  | 0.89844700  |
| H   | -1.29902200 | 2.95055700  | -0.89844600 |
| H   | -2.72429000 | 2.36034700  | -0.00000100 |
| C   | -1.64032500 | -2.44042800 | 0.00000000  |
| H   | -1.29902300 | -2.95055700 | -0.89844700 |
| H   | -1.29902300 | -2.95055700 | 0.89844600  |
| H   | -2.72429000 | -2.36034700 | 0.00000000  |
| H   | -2.82352000 | 0.00000000  | 0.00000000  |

**Compound 6 complex with AuCl**

**Absolute Energy = -1070.252126 a.u.**

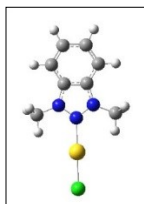

|     |            |             |             |
|-----|------------|-------------|-------------|
| 1 1 |            |             |             |
| C   | 0.00000000 | 0.70422900  | -2.62278100 |
| C   | 0.00000000 | -0.70422900 | -2.62278100 |
| C   | 0.00000000 | -1.44983300 | -3.81324300 |
| C   | 0.00000000 | -0.71163000 | -4.98539600 |
| C   | 0.00000000 | 0.71163000  | -4.98539600 |
| C   | 0.00000000 | 1.44983300  | -3.81324300 |
| H   | 0.00000000 | -2.53429600 | -3.81743900 |
| H   | 0.00000000 | -1.23241000 | -5.93779200 |

|    |             |             |             |
|----|-------------|-------------|-------------|
| H  | 0.00000000  | 1.23241000  | -5.93779200 |
| H  | 0.00000000  | 2.53429600  | -3.81743900 |
| N  | 0.00000000  | -1.07026700 | -1.30023900 |
| N  | 0.00000000  | 0.00000000  | -0.51291400 |
| N  | 0.00000000  | 1.07026700  | -1.30023900 |
| C  | 0.00000000  | -2.43487700 | -0.75420100 |
| H  | -0.89882400 | -2.95125000 | -1.09978300 |
| H  | 0.89882200  | -2.95125100 | -1.09978500 |
| H  | 0.00000100  | -2.37410700 | 0.33476600  |
| C  | 0.00000000  | 2.43487700  | -0.75420100 |
| H  | 0.89882400  | 2.95125000  | -1.09978300 |
| H  | -0.89882200 | 2.95125100  | -1.09978500 |
| H  | -0.00000100 | 2.37410700  | 0.33476600  |
| Au | 0.00000000  | 0.00000000  | 1.58949000  |
| Cl | 0.00000000  | 0.00000000  | 3.85714800  |

**Compound 6 + Hydride ion**

**Absolute Energy = -475.471745 a.u.**

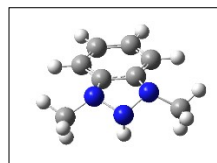

|     |             |             |             |
|-----|-------------|-------------|-------------|
| 0 1 |             |             |             |
| C   | -0.21291900 | 0.69914700  | 0.16771800  |
| C   | -0.21299500 | -0.69912500 | 0.16776000  |
| C   | -1.38174400 | -1.41397300 | 0.02905000  |
| C   | -2.57307900 | -0.69199900 | -0.10463900 |
| C   | -2.57300500 | 0.69225300  | -0.10468200 |
| C   | -1.38159200 | 1.41411200  | 0.02894100  |
| H   | -1.38470700 | -2.49529400 | 0.02396600  |
| H   | -3.50544800 | -1.22728300 | -0.21871200 |
| H   | -3.50531500 | 1.22763000  | -0.21880200 |
| H   | -1.38443500 | 2.49543200  | 0.02379000  |
| N   | 1.11392000  | -1.11335900 | 0.38128400  |
| N   | 1.92294000  | -0.00008300 | -0.03464900 |
| N   | 1.11401400  | 1.11323200  | 0.38121800  |
| C   | 1.56485900  | -2.34494300 | -0.21477600 |
| H   | 0.95287800  | -3.16239400 | 0.15944400  |
| H   | 1.49117100  | -2.32095000 | -1.31221400 |
| H   | 2.59864200  | -2.51930200 | 0.07377400  |
| C   | 1.56518900  | 2.34478800  | -0.21467000 |
| H   | 1.49176600  | 2.32084700  | -1.31213400 |
| H   | 0.95319300  | 3.16229500  | 0.15940600  |
| H   | 2.59892200  | 2.51904900  | 0.07411600  |
| H   | 1.86893000  | -0.00012500 | -1.07581900 |

**Compound 7 (Singlet)**

**Absolute Energy = -516.371020 a.u.**

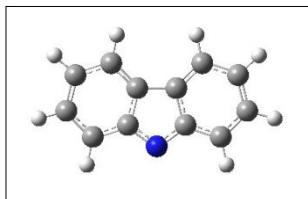

|     |             |             |             |
|-----|-------------|-------------|-------------|
| 1 1 |             |             |             |
| C   | -3.07036200 | 1.04571100  | -0.00012900 |
| C   | -3.41351700 | -0.29543200 | -0.00010800 |
| C   | -2.41548400 | -1.26776800 | -0.00002300 |
| C   | -1.08767900 | -0.82839200 | -0.00004600 |
| C   | -0.74070000 | 0.55803700  | -0.00008200 |
| C   | -1.71717100 | 1.49907600  | -0.00009200 |
| H   | -3.85847800 | 1.78745800  | -0.00013800 |
| H   | -4.45419300 | -0.58374900 | -0.00013800 |
| H   | -2.63750200 | -2.32654900 | -0.00005000 |
| H   | -1.50681700 | 2.55958200  | -0.00007200 |
| C   | 1.08767900  | -0.82839200 | 0.00004600  |
| C   | 2.41548400  | -1.26776800 | 0.00018000  |
| C   | 3.41351700  | -0.29543200 | 0.00017900  |
| C   | 3.07036200  | 1.04571100  | 0.00012900  |
| C   | 1.71717100  | 1.49907600  | 0.00005200  |
| C   | 0.74070000  | 0.55803700  | -0.00002000 |
| H   | 2.63750100  | -2.32654900 | 0.00017200  |
| H   | 4.45419300  | -0.58374900 | 0.00023600  |
| H   | 3.85847900  | 1.78745800  | 0.00018600  |
| H   | 1.50681700  | 2.55958200  | 0.00005200  |
| N   | 0.00000000  | -1.62975300 | -0.00011000 |

**Compound 7 (triplet)**

**Absolute Energy = -516.356856 a.u.**

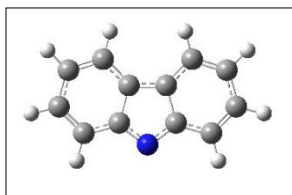

|     |             |             |             |
|-----|-------------|-------------|-------------|
| 1 3 |             |             |             |
| C   | -3.00601400 | 1.10971400  | -0.00013800 |
| C   | -3.36500900 | -0.27045100 | -0.00013900 |
| C   | -2.42035400 | -1.27255900 | -0.00008800 |
| C   | -1.07847200 | -0.88206700 | -0.00003500 |
| C   | -0.71063700 | 0.52819900  | -0.00003500 |
| C   | -1.68722000 | 1.51893300  | -0.00008700 |
| H   | -3.79724500 | 1.84655200  | -0.00018000 |

|   |             |             |             |
|---|-------------|-------------|-------------|
| H | -4.41615400 | -0.52532900 | -0.00018000 |
| H | -2.68591200 | -2.31989500 | -0.00008900 |
| H | -1.43023600 | 2.56901900  | -0.00008600 |
| C | 1.07847200  | -0.88206700 | 0.00005500  |
| C | 2.42035400  | -1.27255900 | 0.00011400  |
| C | 3.36500900  | -0.27045100 | 0.00014300  |
| C | 3.00601400  | 1.10971400  | 0.00011400  |
| C | 1.68722000  | 1.51893300  | 0.00005600  |
| C | 0.71063700  | 0.52819900  | 0.00002500  |
| H | 2.68591200  | -2.31989500 | 0.00013500  |
| H | 4.41615400  | -0.52532900 | 0.00019000  |
| H | 3.79724500  | 1.84655200  | 0.00014000  |
| H | 1.43023600  | 2.56901900  | 0.00003500  |
| N | 0.00000000  | -1.70313100 | 0.00001700  |

**Compound 7 (Protonated)**

**Absolute Energy = -516.555801 a.u.**

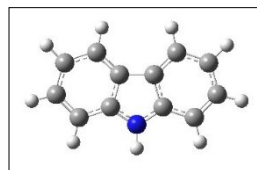

|     |             |             |             |
|-----|-------------|-------------|-------------|
| 2 1 |             |             |             |
| C   | -3.07920300 | 1.07649800  | -0.00012300 |
| C   | -3.44260800 | -0.26877600 | -0.00014200 |
| C   | -2.46606400 | -1.24741500 | -0.00010800 |
| C   | -1.12319200 | -0.80144000 | -0.00005400 |
| C   | -0.73936300 | 0.57525900  | -0.00003200 |
| C   | -1.71053700 | 1.52144200  | -0.00006700 |
| H   | -3.85811100 | 1.83008500  | -0.00015200 |
| H   | -4.48793000 | -0.54372300 | -0.00018200 |
| H   | -2.71331400 | -2.30241200 | -0.00011900 |
| H   | -1.49720300 | 2.58205000  | -0.00005700 |
| C   | 1.12319200  | -0.80144000 | 0.00004100  |
| C   | 2.46606400  | -1.24741500 | 0.00009900  |
| C   | 3.44260800  | -0.26877600 | 0.00014700  |
| C   | 3.07920300  | 1.07649800  | 0.00013500  |
| C   | 1.71053700  | 1.52144300  | 0.00007600  |
| C   | 0.73936300  | 0.57525900  | 0.00003000  |
| H   | 2.71331400  | -2.30241200 | 0.00010800  |
| H   | 4.48793000  | -0.54372300 | 0.00019500  |
| H   | 3.85811100  | 1.83008500  | 0.00017300  |
| H   | 1.49720300  | 2.58205000  | 0.00006800  |
| N   | 0.00000000  | -1.54706900 | -0.00000500 |
| H   | 0.00000000  | -2.56934400 | -0.00001400 |

**Compound 7 complex with AuCl**

**Absolute Energy = -1111.947762 a.u.**

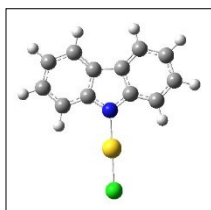

| 1 1 |             |             |             |
|-----|-------------|-------------|-------------|
| C   | 3.18634400  | 3.05850600  | -0.00067700 |
| C   | 1.84678100  | 3.41927000  | -0.00061300 |
| C   | 0.85990300  | 2.44047200  | -0.00047400 |
| C   | 1.28182600  | 1.10800400  | -0.00034000 |
| C   | 2.65325100  | 0.73722100  | -0.00041500 |
| C   | 3.61195900  | 1.70308700  | -0.00058500 |
| H   | 3.93919600  | 3.83570300  | -0.00080800 |
| H   | 1.57090400  | 4.46338700  | -0.00066800 |
| H   | -0.19427500 | 2.68883300  | -0.00039500 |
| H   | 4.66738600  | 1.46898800  | -0.00067300 |
| C   | 1.28133600  | -1.10815500 | -0.00020200 |
| C   | 0.85884300  | -2.44045100 | -0.00018300 |
| C   | 1.84530200  | -3.41967000 | -0.00019400 |
| C   | 3.18502000  | -3.05948100 | -0.00028700 |
| C   | 3.61122100  | -1.70424800 | -0.00036400 |
| C   | 2.65293100  | -0.73796600 | -0.00032100 |
| H   | -0.19543700 | -2.68837100 | -0.00009900 |
| H   | 1.56898200  | -4.46367000 | -0.00013300 |
| H   | 3.93753400  | -3.83700600 | -0.00032400 |
| H   | 4.66675000  | -1.47061300 | -0.00047900 |
| N   | 0.48139900  | 0.00010500  | -0.00007000 |
| Au  | -1.52910100 | 0.00032400  | 0.00038700  |
| Cl  | -3.75177600 | -0.00018400 | 0.00008300  |

### Compound 7 + Hydride ion

Absolute Energy = -517.302118 a.u.

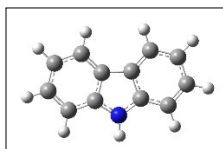

| 0 1 |            |             |             |
|-----|------------|-------------|-------------|
| C   | 3.04784100 | 1.11312000  | -0.00035000 |
| C   | 3.42174300 | -0.22912800 | -0.00051700 |
| C   | 2.46446200 | -1.23048300 | -0.00013600 |
| C   | 1.12861800 | -0.82538300 | 0.00029100  |
| C   | 0.73263700 | 0.53453200  | 0.00053300  |
| C   | 1.69698900 | 1.50959300  | 0.00022700  |
| H   | 3.81620200 | 1.87367200  | -0.00072500 |
| H   | 4.46957900 | -0.49129800 | -0.00093200 |

|   |             |             |             |
|---|-------------|-------------|-------------|
| H | 2.73898800  | -2.27655000 | -0.00010000 |
| H | 1.43990900  | 2.55976000  | 0.00039600  |
| C | -1.12867200 | -0.82538300 | 0.00028900  |
| C | -2.46475600 | -1.23038300 | -0.00012700 |
| C | -3.42177400 | -0.22903900 | -0.00051100 |
| C | -3.04759200 | 1.11331900  | -0.00035400 |
| C | -1.69674900 | 1.50973700  | 0.00021600  |
| C | -0.73245900 | 0.53464300  | 0.00049700  |
| H | -2.73933900 | -2.27643000 | -0.00011100 |
| H | -4.46968000 | -0.49092600 | -0.00092200 |
| H | -3.81591800 | 1.87391500  | -0.00071300 |
| H | -1.43966200 | 2.55989900  | 0.00041700  |
| N | -0.00022600 | -1.59882300 | 0.00031300  |
| H | -0.00021400 | -2.61115500 | 0.00014800  |

### Compound 8a (Singlet)

Absolute Energy = -134.105527 a.u.

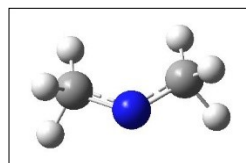

| 1 1 |             |             |             |
|-----|-------------|-------------|-------------|
| C   | -1.18663200 | -0.17759100 | -0.00022300 |
| C   | 1.18664500  | -0.17757900 | 0.00019200  |
| N   | -0.00000700 | 0.50241900  | 0.00000300  |
| H   | 1.77966800  | 0.28617400  | 0.82170400  |
| H   | 1.17134700  | -1.26458400 | 0.00048500  |
| H   | -1.17134700 | -1.26459700 | -0.00070700 |
| H   | -1.77837400 | 0.28528700  | 0.82285900  |
| H   | 1.77852000  | 0.28544400  | -0.82269000 |
| H   | -1.77984400 | 0.28636200  | -0.82148100 |

### Compound 8a (triplet)

Absolute Energy = -134.110503 a.u.

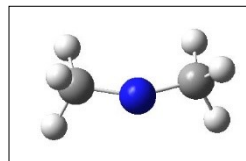

| 1 3 |             |             |             |
|-----|-------------|-------------|-------------|
| C   | -1.35167900 | -0.07663800 | 0.00013000  |
| C   | 1.35167900  | -0.07663900 | -0.00012700 |
| N   | 0.00000000  | 0.27455000  | -0.00000400 |

|   |             |             |             |
|---|-------------|-------------|-------------|
| H | 1.83274300  | 0.33635400  | 0.89411800  |
| H | 1.42808400  | -1.17208800 | 0.00090000  |
| H | -1.42808400 | -1.17208700 | -0.00114300 |
| H | -1.83208800 | 0.33443700  | 0.89561800  |
| H | 1.83214700  | 0.33464000  | -0.89548900 |
| H | -1.83280100 | 0.33655800  | -0.89398900 |

|    |             |            |             |
|----|-------------|------------|-------------|
| Au | -0.20655200 | 0.00000000 | -0.00001300 |
| Cl | -2.44826600 | 0.00000000 | -0.00007100 |

### Compound 8a (Protonated)

Absolute Energy = -134.168203 a.u.

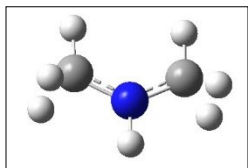

|     |             |             |             |
|-----|-------------|-------------|-------------|
| 2 1 |             |             |             |
| C   | -1.21496700 | -0.22247000 | -0.00011100 |
| C   | 1.21497500  | -0.22246300 | 0.00007000  |
| N   | -0.00000200 | 0.38245000  | 0.00001500  |
| H   | 1.86250500  | 0.29683600  | 0.78871200  |
| H   | 1.22861100  | -1.30919400 | 0.00014100  |
| H   | -1.22860800 | -1.30920100 | -0.00035600 |
| H   | -1.86172500 | 0.29618300  | 0.78981000  |
| H   | 1.86178300  | 0.29633500  | -0.78969100 |
| H   | -1.86258900 | 0.29699900  | -0.78855700 |
| H   | -0.00000400 | 1.42448800  | 0.00007800  |

### Compound 8a + Hydride ion

Absolute Energy = -135.077021 a.u.

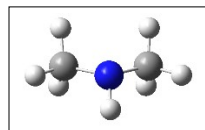

|     |             |             |             |
|-----|-------------|-------------|-------------|
| 0 1 |             |             |             |
| C   | -1.20445600 | 0.22358000  | 0.02029000  |
| C   | 1.20450200  | 0.22364000  | 0.02030200  |
| N   | -0.00003800 | -0.56749500 | -0.14817000 |
| H   | 2.08286700  | -0.41568900 | -0.05430800 |
| H   | 1.26087600  | 0.96351800  | -0.77988800 |
| H   | -1.25844200 | 0.96645700  | -0.77728800 |
| H   | -2.08323700 | -0.41468700 | -0.05876400 |
| H   | 1.24534900  | 0.76457900  | 0.97688800  |
| H   | -1.24742400 | 0.76118200  | 0.97868100  |
| H   | 0.00000500  | -1.33620800 | 0.50831500  |

### Compound 8b (Singlet)

Absolute Energy = -517.556711 a.u.

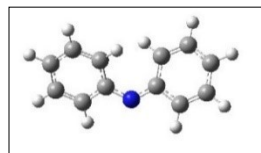

### Compound 8a complex with AuCl

Absolute Energy = -729.678470 a.u.

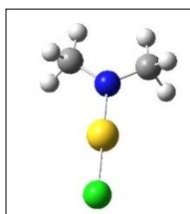

|     |            |             |             |
|-----|------------|-------------|-------------|
| 1 1 |            |             |             |
| C   | 2.49042300 | -1.22892500 | 0.00003200  |
| C   | 2.49042100 | 1.22892600  | 0.00014800  |
| N   | 1.74321100 | 0.00000000  | 0.00005300  |
| H   | 2.17690700 | 1.83117400  | 0.87123200  |
| H   | 3.56997400 | 1.06985600  | 0.00102900  |
| H   | 3.56997600 | -1.06985400 | -0.00110800 |
| H   | 2.17862400 | -1.82989900 | 0.87267700  |
| H   | 2.17841000 | 1.83012400  | -0.87225700 |
| H   | 2.17669700 | -1.83139900 | -0.87081000 |

|     |             |             |             |
|-----|-------------|-------------|-------------|
| 1 1 |             |             |             |
| N   | 0.00000000  | -1.08279200 | 0.00000000  |
| C   | -1.18315700 | -0.46667200 | 0.05749400  |
| C   | -2.29902300 | -1.26093600 | -0.33452700 |
| C   | -1.40118000 | 0.86342100  | 0.52820800  |
| C   | -3.55361000 | -0.70676000 | -0.38451800 |
| H   | -2.10681700 | -2.28203300 | -0.63354900 |
| C   | -2.66940300 | 1.38283000  | 0.51741100  |
| H   | -0.58452200 | 1.41157100  | 0.97647800  |
| C   | -3.73637000 | 0.61141000  | 0.03873700  |
| H   | -4.39807100 | -1.28949900 | -0.72276600 |
| H   | -2.85627300 | 2.37416900  | 0.90477800  |
| H   | -4.73202700 | 1.03580300  | 0.03533900  |
| C   | 1.18315700  | -0.46667100 | -0.05749300 |
| C   | 1.40118000  | 0.86342000  | -0.52820900 |
| C   | 2.29902300  | -1.26093600 | 0.33452700  |



|   |            |             |             |
|---|------------|-------------|-------------|
| C | 2.66940300 | 1.38283000  | -0.51741100 |
| H | 0.58452100 | 1.41157100  | -0.97647800 |
| C | 3.55361000 | -0.70676000 | 0.38451700  |
| H | 2.10681700 | -2.28203400 | 0.63354800  |
| C | 3.73636900 | 0.61141000  | -0.03873600 |
| H | 2.85627300 | 2.37416900  | -0.90477800 |
| H | 4.39807100 | -1.28949900 | 0.72276600  |
| H | 4.73202700 | 1.03580300  | -0.03533900 |

### Compound 8b (triplet)

Absolute Energy = -517.543526 a.u.

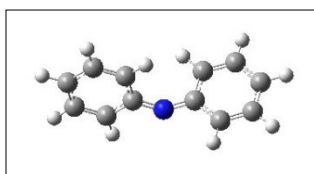

|     |             |             |             |
|-----|-------------|-------------|-------------|
| 1 3 |             |             |             |
| N   | 0.00000000  | 0.00000000  | 0.68357200  |
| C   | 0.00000000  | -1.25983800 | 0.31874100  |
| C   | 0.78826400  | -2.20895300 | 1.03867400  |
| C   | -0.83003700 | -1.69512300 | -0.76350100 |
| C   | 0.75640300  | -3.52583300 | 0.66798200  |
| H   | 1.39263300  | -1.85948800 | 1.86344700  |
| C   | -0.83072100 | -3.01673000 | -1.11493100 |
| H   | -1.43204500 | -0.96284000 | -1.28345900 |
| C   | -0.04559200 | -3.93750800 | -0.40507600 |
| H   | 1.35105300  | -4.25173400 | 1.20385800  |
| H   | -1.44215100 | -3.35511200 | -1.93948400 |
| H   | -0.06289800 | -4.98070700 | -0.68820300 |
| C   | 0.00000000  | 1.25983800  | 0.31874100  |
| C   | 0.83003700  | 1.69512300  | -0.76350100 |
| C   | -0.78826400 | 2.20895300  | 1.03867400  |
| C   | 0.83072100  | 3.01673000  | -1.11493100 |
| H   | 1.43204500  | 0.96284000  | -1.28345900 |
| C   | -0.75640300 | 3.52583300  | 0.66798200  |
| H   | -1.39263300 | 1.85948800  | 1.86344700  |
| C   | 0.04559200  | 3.93750800  | -0.40507600 |
| H   | 1.44215100  | 3.35511200  | -1.93948400 |
| H   | -1.35105300 | 4.25173400  | 1.20385800  |
| H   | 0.06289800  | 4.98070700  | -0.68820300 |

### Compound 8b (Protonated)

Absolute Energy = -517.743903 a.u.

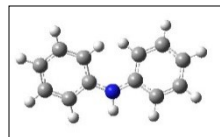

|     |             |             |             |
|-----|-------------|-------------|-------------|
| 2 1 |             |             |             |
| N   | 0.00000000  | 0.95029200  | 0.00000000  |
| C   | -1.23199500 | 0.40729800  | -0.05366800 |
| C   | -2.32436800 | 1.27470800  | 0.27195000  |
| C   | -1.46623800 | -0.94682900 | -0.44889400 |
| C   | -3.58993200 | 0.76575100  | 0.31591100  |
| H   | -2.13011400 | 2.30921400  | 0.53202300  |
| C   | -2.74330900 | -1.42652600 | -0.41567800 |
| H   | -0.66215000 | -1.54137500 | -0.85893500 |
| C   | -3.80161700 | -0.58442000 | -0.01663100 |
| H   | -4.42541600 | 1.39282500  | 0.59432200  |
| H   | -2.95625600 | -2.43550600 | -0.74075400 |
| H   | -4.81132600 | -0.97798400 | -0.00725000 |
| C   | 1.23199500  | 0.40729800  | 0.05366800  |
| C   | 1.46623800  | -0.94682900 | 0.44889400  |
| C   | 2.32436800  | 1.27470800  | -0.27195000 |
| C   | 2.74330900  | -1.42652600 | 0.41567800  |
| H   | 0.66215000  | -1.54137500 | 0.85893500  |
| C   | 3.58993200  | 0.76575100  | -0.31591100 |
| H   | 2.13011400  | 2.30921400  | -0.53202300 |
| C   | 3.80161700  | -0.58442000 | 0.01663100  |
| H   | 2.95625600  | -2.43550600 | 0.74075400  |
| H   | 4.42541600  | 1.39282500  | -0.59432200 |
| H   | 4.81132600  | -0.97798400 | 0.00725000  |
| H   | 0.00000000  | 1.97382000  | 0.00000000  |

### Compound 8b complex with AuCl

Absolute Energy = -1113.121961 a.u.

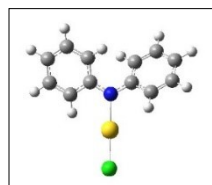

|     |             |            |             |
|-----|-------------|------------|-------------|
| 1 1 |             |            |             |
| N   | 0.00000000  | 0.00000000 | -0.68436400 |
| C   | 0.27059300  | 1.14992500 | -1.35775500 |
| C   | 0.00000000  | 2.39299800 | -0.72369900 |
| C   | 0.88311700  | 1.13756800 | -2.64353400 |
| C   | 0.24695700  | 3.56405400 | -1.39097000 |
| H   | -0.45453800 | 2.39504100 | 0.25858700  |
| C   | 1.15657200  | 2.32353700 | -3.27897000 |
| H   | 1.22233900  | 0.19964500 | -3.05997300 |

|    |             |             |             |
|----|-------------|-------------|-------------|
| C  | 0.82518400  | 3.53292700  | -2.66531700 |
| H  | 0.00555200  | 4.51068400  | -0.92950300 |
| H  | 1.65971900  | 2.32195600  | -4.23516800 |
| H  | 1.04804500  | 4.46368900  | -3.17026300 |
| C  | -0.27059300 | -1.14992500 | -1.35775500 |
| C  | -0.88311700 | -1.13756800 | -2.64353400 |
| C  | 0.00000000  | -2.39299800 | -0.72369900 |
| C  | -1.15657200 | -2.32353700 | -3.27897000 |
| H  | -1.22233900 | -0.19964500 | -3.05997300 |
| C  | -0.24695700 | -3.56405400 | -1.39097000 |
| H  | 0.45453800  | -2.39504100 | 0.25858700  |
| C  | -0.82518400 | -3.53292700 | -2.66531700 |
| H  | -1.65971900 | -2.32195600 | -4.23516800 |
| H  | -0.00555200 | -4.51068400 | -0.92950300 |
| H  | -1.04804500 | -4.46368900 | -3.17026300 |
| Au | 0.00000000  | 0.00000000  | 1.39459200  |
| Cl | 0.00000000  | 0.00000000  | 3.62431700  |

### Compound 8b + Hydride ion

Absolute Energy = -518.460803 a.u.

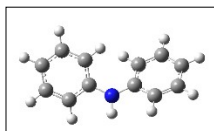

|     |             |             |             |
|-----|-------------|-------------|-------------|
| 0 1 |             |             |             |
| N   | -0.00000400 | -1.06366800 | -0.00022700 |
| C   | 1.25397900  | -0.45769800 | -0.02011100 |
| C   | 2.35443800  | -1.17705300 | 0.45367100  |
| C   | 1.46251900  | 0.81948800  | -0.54523600 |
| C   | 3.62625700  | -0.63326700 | 0.40659300  |
| H   | 2.19980200  | -2.16703100 | 0.86515600  |
| C   | 2.73869400  | 1.35998200  | -0.57210800 |
| H   | 0.63083200  | 1.37519800  | -0.95346000 |
| C   | 3.82890600  | 0.64439000  | -0.09769300 |
| H   | 4.46321200  | -1.20998300 | 0.77732800  |
| H   | 2.88070400  | 2.35026300  | -0.98440600 |
| H   | 4.82076900  | 1.07278200  | -0.12502700 |
| C   | -1.25402200 | -0.45767200 | 0.01989600  |
| C   | -1.46239400 | 0.81957500  | 0.54496100  |
| C   | -2.35456600 | -1.17705700 | -0.45356900 |
| C   | -2.73854000 | 1.36007400  | 0.57209200  |
| H   | -0.63058100 | 1.37529100  | 0.95291400  |
| C   | -3.62638200 | -0.63323500 | -0.40624600 |
| H   | -2.20006800 | -2.16708800 | -0.86497800 |
| C   | -3.82888400 | 0.64444900  | 0.09797700  |
| H   | -2.88048100 | 2.35039000  | 0.98433100  |
| H   | -4.46342700 | -1.20997300 | -0.77674300 |
| H   | -4.82072100 | 1.07289000  | 0.12549700  |
| H   | -0.00004600 | -2.06893600 | -0.00039300 |

### Pyrrolidine (Singlet)

Absolute Energy = -212.446592 a.u.

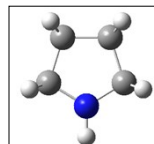

|     |             |             |             |
|-----|-------------|-------------|-------------|
| 0 1 |             |             |             |
| C   | -1.22570000 | -0.44344900 | 0.00010500  |
| C   | -0.77213800 | 1.02878500  | -0.00003900 |
| C   | 0.77213800  | 1.02878500  | 0.00020400  |
| C   | 1.22570000  | -0.44344900 | -0.00006700 |
| N   | 0.00000000  | -1.19887100 | -0.00024700 |
| H   | -1.15923000 | 1.54779200  | 0.87418800  |
| H   | 1.15922500  | 1.54786400  | -0.87398300 |
| H   | 1.84219100  | -0.65566700 | -0.88036700 |
| H   | 0.00000000  | -2.19927300 | -0.00026500 |
| H   | -1.84240200 | -0.65583200 | -0.88000600 |
| H   | -1.84193700 | -0.65581700 | 0.88055000  |
| H   | -1.15894600 | 1.54752600  | -0.87455000 |
| H   | 1.15895100  | 1.54745400  | 0.87475500  |
| H   | 1.84214800  | -0.65598300 | 0.88018900  |

### 2,5-dihydro-1H-pyrrole (Singlet)

Absolute Energy = -211.251671 a.u.

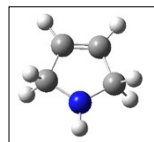

|     |             |             |             |
|-----|-------------|-------------|-------------|
| 0 1 |             |             |             |
| C   | -1.21163700 | 0.35176700  | 0.00001100  |
| C   | -0.66199300 | -1.04747100 | -0.00007800 |
| C   | 0.66199200  | -1.04747100 | -0.00007100 |
| C   | 1.21163700  | 0.35176700  | 0.00002400  |
| N   | 0.00000000  | 1.13618200  | 0.00010700  |
| H   | 1.84192000  | 0.52604200  | 0.88242600  |
| H   | 0.00000000  | 2.13520200  | 0.00014800  |
| H   | -1.84192900 | 0.52604200  | 0.88240600  |
| H   | -1.84188000 | 0.52616800  | -0.88239400 |
| H   | 1.84189000  | 0.52616800  | -0.88237500 |
| H   | -1.29578500 | -1.92222300 | -0.00014500 |
| H   | 1.29578500  | -1.92222300 | -0.00013100 |

### Compound XVI' (Singlet)

Absolute Energy = -727.965932 a.u.

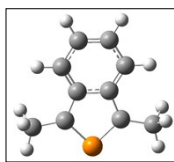

| I 1 |             |             |             |
|-----|-------------|-------------|-------------|
| C   | -0.97134300 | 1.23362500  | 0.00035000  |
| C   | 0.39203300  | 0.70553600  | 0.00026200  |
| C   | 0.39311700  | -0.70516200 | 0.00020300  |
| C   | -0.96858300 | -1.23511000 | 0.00030800  |
| C   | -1.24579200 | -2.68001000 | 0.00005600  |
| C   | -1.24960200 | 2.67847200  | 0.00003000  |
| P   | -2.22164200 | -0.00110300 | -0.00005400 |
| C   | 1.56969800  | -1.40469500 | 0.00004900  |
| C   | 1.56739500  | 1.40653300  | 0.00001100  |
| C   | 2.79294700  | -0.68251400 | -0.00011300 |
| C   | 2.79179600  | 0.68582000  | -0.00011700 |
| H   | 3.72779400  | -1.22478000 | -0.00051400 |
| H   | 3.72585600  | 1.22948000  | 0.00002200  |
| H   | 1.58415200  | -2.48705200 | 0.00053000  |
| H   | 1.58050700  | 2.48889800  | -0.00030700 |
| H   | -0.78300300 | 3.13965900  | -0.87763600 |
| H   | -2.31133100 | 2.90560600  | 0.00486400  |
| H   | -0.77345300 | 3.14293300  | 0.87060600  |
| H   | -0.77172300 | -3.14438900 | 0.87168500  |
| H   | -2.30740700 | -2.90795100 | 0.00190000  |
| H   | -0.77675100 | -3.14082700 | -0.87657200 |

### Compound XVI'' (Singlet)

Absolute Energy = -1570.295246 a.u.

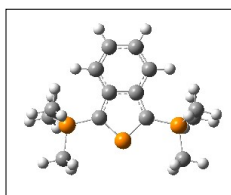

| 0 1 |             |             |             |
|-----|-------------|-------------|-------------|
| C   | -1.27327800 | 0.35200300  | 0.00063100  |
| C   | -0.71465000 | -0.98657000 | 0.00030700  |
| C   | 0.71463000  | -0.98657600 | 0.00010100  |
| C   | 1.27327100  | 0.35199500  | 0.00014000  |
| C   | 1.38701900  | -2.21499600 | -0.00001200 |
| C   | -1.38706000 | -2.21497900 | 0.00027300  |
| C   | 0.69569900  | -3.41682800 | -0.00005800 |
| C   | -0.69575500 | -3.41681900 | 0.00006400  |
| H   | 1.23906900  | -4.35259800 | -0.00015700 |

|    |             |             |             |
|----|-------------|-------------|-------------|
| H  | -1.23913600 | -4.35258300 | 0.00004300  |
| H  | 2.47121700  | -2.24363100 | -0.00001800 |
| H  | -2.47126000 | -2.24360100 | 0.00047900  |
| Si | 0.00000500  | 1.68440700  | 0.00057100  |
| P  | -2.93971200 | 0.66131500  | -0.00006900 |
| P  | 2.93971400  | 0.66130200  | -0.00006800 |
| C  | -3.85394700 | 0.01760600  | -1.43330100 |
| H  | -3.68683800 | -1.05416100 | -1.52231800 |
| H  | -4.92192500 | 0.21476100  | -1.34197000 |
| H  | -3.46370800 | 0.50078700  | -2.32778200 |
| C  | -3.85536800 | 0.01746100  | 1.43220300  |
| H  | -4.92320100 | 0.21497600  | 1.33993300  |
| H  | -3.68870400 | -1.05438000 | 1.52113100  |
| H  | -3.46582100 | 0.50031500  | 2.32716300  |
| C  | -3.28712200 | 2.43117900  | -0.00004400 |
| H  | -2.84337000 | 2.88789600  | 0.88232800  |
| H  | -2.84394900 | 2.88787100  | -0.88271500 |
| H  | -4.36525100 | 2.58854500  | 0.00030300  |
| C  | 3.28707600  | 2.43117700  | -0.00048200 |
| H  | 2.84379500  | 2.88804900  | 0.88204400  |
| H  | 4.36519700  | 2.58858800  | -0.00075900 |
| H  | 2.84338600  | 2.88768300  | -0.88299300 |
| C  | 3.85466900  | 0.01727700  | -1.43270300 |
| H  | 4.92241800  | 0.21568400  | -1.34134200 |
| H  | 3.68880000  | -1.05474100 | -1.52090300 |
| H  | 3.46407100  | 0.49933500  | -2.32763300 |
| C  | 3.85476200  | 0.01778700  | 1.43273500  |
| H  | 3.68834900  | -1.05411300 | 1.52150700  |
| H  | 4.92259600  | 0.21560200  | 1.34112900  |
| H  | 3.46449700  | 0.50048400  | 2.32746400  |

### Compound XVII' (Singlet)

Absolute Energy = -601.085589 a.u.

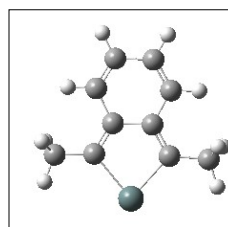

| 0 1 |             |             |             |
|-----|-------------|-------------|-------------|
| C   | -0.13793500 | -1.43001500 | 0.07490900  |
| C   | 1.03200700  | -0.75430700 | 0.02703700  |
| C   | 1.03154600  | 0.75424400  | 0.02506300  |
| C   | -0.13838900 | 1.42951000  | 0.08013300  |
| C   | 2.33175400  | 1.41895100  | -0.01908100 |
| C   | 2.33268200  | -1.41844800 | -0.01107900 |
| C   | 3.48027800  | 0.72822900  | -0.05206200 |
| C   | 3.48079500  | -0.72722100 | -0.04732500 |
| H   | 4.42926500  | 1.24755500  | -0.08409200 |

|    |             |             |             |
|----|-------------|-------------|-------------|
| H  | 4.43014800  | -1.24608900 | -0.07558800 |
| H  | 2.35053900  | 2.50079400  | -0.02433800 |
| H  | 2.35209400  | -2.50029200 | -0.01030800 |
| Sn | -1.80072400 | -0.00006800 | -0.03840100 |
| C  | -0.21680300 | 2.93138800  | 0.09185100  |
| H  | 0.23213200  | 3.37047400  | -0.80394600 |
| H  | -1.24618000 | 3.28458300  | 0.14110100  |
| H  | 0.31014400  | 3.35324800  | 0.95226400  |
| C  | -0.21603600 | -2.93185600 | 0.08820000  |
| H  | -1.24550300 | -3.28529100 | 0.13365300  |
| H  | 0.23643600  | -3.37151400 | -0.80552600 |
| H  | 0.30773200  | -3.35291700 | 0.95095600  |

#### Compound XVII'' (Singlet)

Absolute Energy = -1443.337896 a.u.

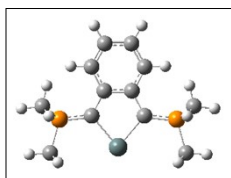

|     |             |             |             |
|-----|-------------|-------------|-------------|
| 0 1 |             |             |             |
| C   | -1.37251800 | -0.00719100 | -0.00003400 |
| C   | -0.71809000 | 1.28774000  | 0.00003600  |
| C   | 0.71809000  | 1.28773900  | 0.00007200  |
| C   | 1.37251700  | -0.00719100 | 0.00003700  |
| C   | 1.37616000  | 2.52981400  | 0.00014700  |
| C   | -1.37615800 | 2.52981700  | 0.00009600  |
| C   | 0.69528000  | 3.73451500  | 0.00018900  |
| C   | -0.69527500 | 3.73451700  | 0.00016900  |
| H   | 1.24426800  | 4.66698800  | 0.00025100  |
| H   | -1.24426000 | 4.66699100  | 0.00021300  |
| H   | 2.45957300  | 2.56122500  | 0.00018300  |
| H   | -2.45957000 | 2.56123200  | 0.00009400  |
| P   | -3.05043600 | -0.19104900 | -0.00006600 |
| P   | 3.05043400  | -0.19105300 | 0.00000600  |
| C   | -3.94232500 | 0.49497900  | 1.43334800  |
| H   | -3.71320800 | 1.55323600  | 1.53966700  |
| H   | -5.01925400 | 0.36333300  | 1.32860200  |
| H   | -3.59291000 | -0.02189700 | 2.32598800  |
| C   | -3.94229100 | 0.49495400  | -1.43351700 |
| H   | -5.01922200 | 0.36330200  | -1.32879900 |
| H   | -3.71318100 | 1.55320900  | -1.53985300 |
| H   | -3.59284800 | -0.02193600 | -2.32613800 |
| C   | -3.53026500 | -1.93362100 | -0.00006800 |
| H   | -3.13047400 | -2.42492800 | -0.88530600 |
| H   | -3.13049700 | -2.42492500 | 0.88518300  |
| H   | -4.61700000 | -2.01088600 | -0.00008200 |
| C   | 3.53025800  | -1.93362700 | -0.00002400 |
| H   | 3.13036800  | -2.42494700 | -0.88521000 |

|    |             |             |             |
|----|-------------|-------------|-------------|
| H  | 4.61699300  | -2.01089600 | -0.00015400 |
| H  | 3.13058500  | -2.42491500 | 0.88527900  |
| C  | 3.94235300  | 0.49493100  | 1.43342500  |
| H  | 5.01926200  | 0.36306200  | 1.32875200  |
| H  | 3.71345000  | 1.55324400  | 1.53964500  |
| H  | 3.59278100  | -0.02180300 | 2.32608600  |
| C  | 3.94227700  | 0.49499600  | -1.43342800 |
| H  | 3.71309600  | 1.55323700  | -1.53976200 |
| H  | 5.01921500  | 0.36341400  | -1.32869000 |
| H  | 3.59288400  | -0.02191400 | -2.32605800 |
| Sn | -0.00000200 | -1.63592300 | -0.00003300 |

#### Compound XVIII' (Singlet)

Absolute Energy = -2622.507301 a.u.

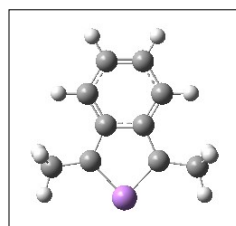

|     |             |             |             |
|-----|-------------|-------------|-------------|
| 1 1 |             |             |             |
| C   | -0.54475000 | 1.28137900  | -0.00028900 |
| C   | 0.79766100  | 0.70740600  | -0.00004600 |
| C   | 0.79766400  | -0.70740500 | 0.00006800  |
| C   | -0.54474300 | -1.28138200 | -0.00012200 |
| C   | 1.97929800  | -1.40102500 | 0.00034700  |
| C   | 1.97929300  | 1.40102900  | 0.00011500  |
| C   | 3.20461800  | -0.68379700 | 0.00051300  |
| C   | 3.20461500  | 0.68380400  | 0.00040800  |
| H   | 4.13795000  | -1.22870600 | 0.00072700  |
| H   | 4.13794600  | 1.22871700  | 0.00054000  |
| H   | 1.99403500  | -2.48330100 | 0.00044300  |
| H   | 1.99402800  | 2.48330500  | 0.00001300  |
| As  | -1.92721700 | -0.00000200 | -0.00023600 |
| C   | -0.76448000 | 2.73568000  | -0.00010500 |
| H   | -0.27699200 | 3.18022200  | 0.87501200  |
| H   | -0.27461300 | 3.18127900  | -0.87328200 |
| H   | -1.81541200 | 3.00793500  | -0.00120900 |
| C   | -0.76447200 | -2.73568200 | 0.00000000  |
| H   | -0.27560600 | -3.18088100 | -0.87397200 |
| H   | -0.27598000 | -3.18062400 | 0.87432300  |
| H   | -1.81540400 | -3.00793900 | -0.00015800 |

#### Compound XVIII'' (Singlet)

Absolute Energy = -3464.834626 a.u.

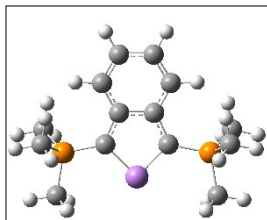

1 1

|    |             |             |             |
|----|-------------|-------------|-------------|
| C  | -1.28255700 | -0.14063900 | -0.00008900 |
| C  | -0.71352800 | 1.16931800  | -0.00000600 |
| C  | 0.71350200  | 1.16932500  | 0.00002700  |
| C  | 1.28255000  | -0.14062300 | -0.00000200 |
| C  | 1.39635300  | 2.40577400  | 0.00007500  |
| C  | -1.39638800 | 2.40576500  | 0.00001800  |
| C  | 0.70320500  | 3.58824600  | 0.00010200  |
| C  | -0.70324500 | 3.58824100  | 0.00007500  |
| H  | 1.23790900  | 4.52775700  | 0.00014400  |
| H  | -1.23795500 | 4.52774800  | 0.00008800  |
| H  | 2.47869900  | 2.43488600  | 0.00009000  |
| H  | -2.47873500 | 2.43488100  | -0.00002400 |
| P  | -2.98586700 | -0.47713100 | -0.00002600 |
| P  | 2.98586100  | -0.47712300 | 0.00005500  |
| C  | -3.82728200 | 0.17635500  | 1.45399900  |
| H  | -3.67369000 | 1.25083600  | 1.52710100  |
| H  | -4.89429400 | -0.03602200 | 1.39480600  |
| H  | -3.40641600 | -0.29752200 | 2.33953700  |
| C  | -3.82744800 | 0.17643400  | -1.45392000 |
| H  | -4.89439200 | -0.03629800 | -1.39478100 |
| H  | -3.67420700 | 1.25098200  | -1.52677900 |
| H  | -3.40642300 | -0.29710800 | -2.33956200 |
| C  | -3.26866100 | -2.25199800 | -0.00006400 |
| H  | -2.82448000 | -2.69819800 | -0.88828700 |
| H  | -2.82518400 | -2.69812200 | 0.88854800  |
| H  | -4.34182800 | -2.43899100 | -0.00048500 |
| C  | 3.26862100  | -2.25199700 | 0.00000500  |
| H  | 2.82464900  | -2.69814600 | -0.88834800 |
| H  | 4.34178400  | -2.43901000 | -0.00015700 |
| H  | 2.82491200  | -2.69816000 | 0.88848300  |
| C  | 3.82737100  | 0.17633300  | 1.45403900  |
| H  | 4.89414800  | -0.03739400 | 1.39543100  |
| H  | 3.67510800  | 1.25105600  | 1.52634700  |
| H  | 3.40554500  | -0.29643300 | 2.33971100  |
| C  | 3.82745800  | 0.17645800  | -1.45381900 |
| H  | 3.67454000  | 1.25106800  | -1.52644100 |
| H  | 4.89434700  | -0.03660300 | -1.39482700 |
| H  | 3.40620300  | -0.29678700 | -2.33950900 |
| As | 0.00000400  | -1.48765400 | -0.00012600 |

**Compound XIX' (Singlet)**

**Absolute Energy = -676.283932 a.u.**

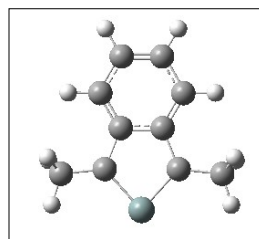

0 1

|    |             |             |             |
|----|-------------|-------------|-------------|
| C  | 1.01385600  | 1.24546600  | 0.00009900  |
| C  | -0.36723000 | 0.70764200  | 0.00014500  |
| C  | -0.36722200 | -0.70764300 | 0.00001300  |
| C  | 1.01387400  | -1.24545400 | 0.00006800  |
| C  | -1.54371400 | -1.39789400 | -0.00001500 |
| C  | -1.54372900 | 1.39788400  | 0.00028800  |
| C  | -2.77670900 | -0.68130600 | 0.00028600  |
| C  | -2.77671700 | 0.68128600  | 0.00045900  |
| H  | -3.71005700 | -1.22740700 | 0.00028300  |
| H  | -3.71007000 | 1.22737800  | 0.00065700  |
| H  | -1.55564500 | -2.48058300 | -0.00031200 |
| H  | -1.55566700 | 2.48057300  | 0.00029400  |
| Si | 2.38767800  | 0.00000500  | 0.00164700  |
| C  | 1.17209000  | -2.71896400 | -0.00154700 |
| H  | 0.67324900  | -3.15574100 | 0.87191900  |
| H  | 0.67324600  | -3.15417000 | -0.87577000 |
| H  | 2.21579600  | -3.02407900 | -0.00177200 |
| C  | 1.17207100  | 2.71897300  | -0.00176700 |
| H  | 0.67318100  | 3.15395500  | -0.87607400 |
| H  | 0.67327500  | 3.15597300  | 0.87161300  |
| H  | 2.21577700  | 3.02408800  | -0.00207100 |

**Compound XIX'' (Singlet)**

**Absolute Energy = -1518.576841 a.u.**

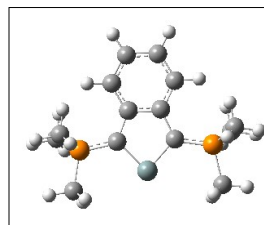

0 1

|   |             |             |             |
|---|-------------|-------------|-------------|
| C | -1.27327800 | 0.35200300  | 0.00063100  |
| C | -0.71465000 | -0.98657000 | 0.00030700  |
| C | 0.71463000  | -0.98657600 | 0.00010100  |
| C | 1.27327100  | 0.35199500  | 0.00014000  |
| C | 1.38701900  | -2.21499600 | -0.00001200 |
| C | -1.38706000 | -2.21497900 | 0.00027300  |
| C | 0.69569900  | -3.41682800 | -0.00005800 |

|    |             |             |             |
|----|-------------|-------------|-------------|
| C  | -0.69575500 | -3.41681900 | 0.00006400  |
| H  | 1.23906900  | -4.35259800 | -0.00015700 |
| H  | -1.23913600 | -4.35258300 | 0.00004300  |
| H  | 2.47121700  | -2.24363100 | -0.00001800 |
| H  | -2.47126000 | -2.24360100 | 0.00047900  |
| Si | 0.00000500  | 1.68440700  | 0.00057100  |
| P  | -2.93971200 | 0.66131500  | -0.00006900 |
| P  | 2.93971400  | 0.66130200  | -0.00006800 |
| C  | -3.85394700 | 0.01760600  | -1.43330100 |
| H  | -3.68683800 | -1.05416100 | -1.52231800 |
| H  | -4.92192500 | 0.21476100  | -1.34197000 |
| H  | -3.46370800 | 0.50078700  | -2.32778200 |
| C  | -3.85536800 | 0.01746100  | 1.43220300  |
| H  | -4.92320100 | 0.21497600  | 1.33993300  |
| H  | -3.68870400 | -1.05438000 | 1.52113100  |
| H  | -3.46582100 | 0.50031500  | 2.32716300  |
| C  | -3.28712200 | 2.43117900  | -0.00004400 |
| H  | -2.84337000 | 2.88789600  | 0.88232800  |
| H  | -2.84394900 | 2.88787100  | -0.88271500 |
| H  | -4.36525100 | 2.58854500  | 0.00030300  |
| C  | 3.28707600  | 2.43117700  | -0.00048200 |
| H  | 2.84379500  | 2.88804900  | 0.88204400  |
| H  | 4.36519700  | 2.58858800  | -0.00075900 |
| H  | 2.84338600  | 2.88768300  | -0.88299300 |
| C  | 3.85466900  | 0.01727700  | -1.43270300 |
| H  | 4.92241800  | 0.21568400  | -1.34134200 |
| H  | 3.68880000  | -1.05474100 | -1.52090300 |
| H  | 3.46407100  | 0.49933500  | -2.32763300 |
| C  | 3.85476200  | 0.01778700  | 1.43273500  |
| H  | 3.68834900  | -1.05411300 | 1.52150700  |
| H  | 4.92259600  | 0.21560200  | 1.34112900  |
| H  | 3.46449700  | 0.50048400  | 2.32746400  |

**Compound XX' (Singlet)**

**Absolute Energy = -284.203642 a.u.**

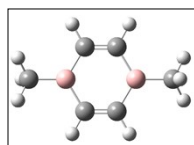

|            |             |             |             |
|------------|-------------|-------------|-------------|
| 0 1        |             |             |             |
| C          | -0.67120400 | 1.34715900  | -0.00090000 |
| C          | 0.67111700  | 1.34721000  | 0.00089200  |
| C          | 0.67120400  | -1.34715300 | 0.00089000  |
| C          | -0.67111600 | -1.34720400 | -0.00090300 |
| H          | -1.20238700 | 2.29807500  | -0.00083400 |
| 1.20223100 | 2.29816300  | 0.00081700  |             |
| H          | 1.20238700  | -2.29806900 | 0.00082000  |
| H          | -1.20223200 | -2.29815700 | -0.00083100 |

|   |             |             |             |
|---|-------------|-------------|-------------|
| B | -1.47944100 | -0.00005200 | 0.01831500  |
| B | 1.47944100  | 0.00005900  | -0.01831700 |
| C | 3.04212500  | 0.00003100  | -0.01212100 |
| H | 3.33873900  | -0.00064600 | 1.04709600  |
| H | 3.49058100  | -0.89129200 | -0.45144000 |
| H | 3.49072400  | 0.89175900  | -0.45045200 |
| C | -3.04212500 | -0.00003800 | 0.01213800  |
| H | -3.33875100 | 0.00052000  | -1.04707600 |
| H | -3.49070200 | -0.89173300 | 0.45055900  |
| H | -3.49059400 | 0.89131800  | 0.45137700  |

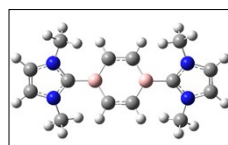

|     |             |             |             |
|-----|-------------|-------------|-------------|
| 0 1 |             |             |             |
| C   | 0.69528100  | -1.11216700 | 0.67639400  |
| C   | -0.69535100 | -1.11207300 | 0.67640400  |
| C   | -0.69526400 | 1.11174000  | -0.67639900 |
| C   | 0.69535400  | 1.11164500  | -0.67644700 |
| H   | 1.18730700  | -1.91804900 | 1.22407000  |
| H   | -1.18751800 | -1.91794800 | 1.22397500  |
| H   | -1.18735500 | 1.91765800  | -1.22393800 |
| H   | 1.18747400  | 1.91746200  | -1.22415300 |
| B   | 1.45876000  | -0.00027900 | 0.00003000  |
| B   | -1.45877600 | -0.00012800 | 0.00004200  |
| C   | -5.17684700 | -0.67212600 | -0.05191100 |
| C   | -5.17677700 | 0.67239700  | 0.05077600  |
| C   | -3.02751000 | -0.00000500 | -0.00007500 |
| H   | -5.98799000 | -1.37457900 | -0.10860400 |
| H   | -5.98787700 | 1.37490400  | 0.10741800  |
| C   | 3.02740700  | -0.00006800 | 0.00000400  |
| C   | 5.17659500  | 0.67259400  | 0.05177300  |
| C   | 5.17686800  | -0.67188100 | -0.05143500 |
| H   | 5.98757400  | 1.37522900  | 0.10857800  |
| H   | 5.98814200  | -1.37415800 | -0.10845600 |
| N   | 3.85937800  | 1.07028700  | 0.08592000  |
| N   | 3.85983000  | -1.07007900 | -0.08614000 |
| N   | -3.85965600 | 1.07025100  | 0.08552700  |
| N   | -3.85976800 | -1.07021400 | -0.08562200 |
| C   | 3.43412000  | -2.44660800 | -0.24825500 |
| H   | 3.34134400  | -2.93968900 | 0.71796100  |
| H   | 2.46317300  | -2.45081100 | -0.73730800 |
| H   | 4.16993100  | -2.96983800 | -0.85580800 |
| C   | 3.43313000  | 2.44667000  | 0.24795200  |
| H   | 3.34033500  | 2.93975000  | -0.71826400 |
| H   | 2.46209700  | 2.45047700  | 0.73683400  |
| H   | 4.16864000  | 2.97013000  | 0.85567200  |
| C   | -3.43343000 | 2.44668200  | 0.24715600  |

|   |             |             |             |
|---|-------------|-------------|-------------|
| H | -2.46319300 | 2.45079800  | 0.73761900  |
| H | -3.33883000 | 2.93893300  | -0.71929200 |
| H | -4.16993600 | 2.97078800  | 0.85309600  |
| C | -3.43350500 | -2.44677800 | -0.24601500 |
| H | -2.46311900 | -2.45124200 | -0.73619000 |
| H | -3.33921100 | -2.93827200 | 0.72086700  |
| H | -4.16981700 | -2.97136300 | -0.85177100 |

**Compound XXI' (Singlet)**

**Absolute Energy = -838.561406 a.u.**

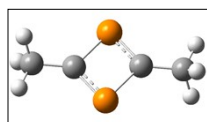

|     |             |             |             |
|-----|-------------|-------------|-------------|
| 0 1 |             |             |             |
| C   | 1.17227100  | 0.02253200  | 0.00055900  |
| C   | -1.17237900 | -0.02224500 | -0.00037900 |
| P   | -0.15707400 | -1.34152000 | -0.00002600 |
| P   | 0.15718900  | 1.34139700  | -0.00001700 |
| C   | 2.64470700  | -0.11988900 | 0.00000000  |
| H   | 3.14867400  | 0.84712900  | -0.00002500 |
| H   | 2.97614600  | -0.68691500 | 0.87479600  |
| H   | 2.97495900  | -0.68553500 | -0.87639900 |
| C   | -2.64482300 | 0.11992700  | -0.00002700 |
| H   | -2.97624800 | 0.68682200  | -0.87491500 |
| H   | -3.14858600 | -0.84719600 | -0.00000400 |
| H   | -2.97533100 | 0.68558300  | 0.87627400  |

**Compound XXI'' (Singlet)**

**Absolute Energy = -1368.275178 a.u.**

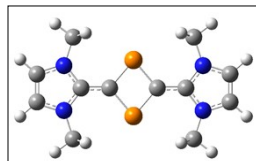

|     |             |             |             |
|-----|-------------|-------------|-------------|
| 0 1 |             |             |             |
| C   | 4.70528800  | 0.67287600  | -0.00003200 |
| C   | 4.70528500  | -0.67288500 | 0.00029800  |
| C   | 2.55575300  | -0.00000400 | -0.00005800 |
| H   | 5.51748700  | 1.37588400  | -0.00015600 |
| H   | 5.51748500  | -1.37589100 | 0.00054900  |
| C   | -2.55576400 | 0.00000600  | 0.00003500  |

|   |             |             |             |
|---|-------------|-------------|-------------|
| C | -4.70528500 | -0.67289900 | -0.00018900 |
| C | -4.70530500 | 0.67285900  | 0.00009800  |
| H | -5.51746600 | -1.37592700 | -0.00035300 |
| H | -5.51749900 | 1.37587100  | 0.00018300  |
| N | -3.38873100 | -1.08424900 | -0.00020600 |
| N | -3.38875600 | 1.08423900  | 0.00024600  |
| N | 3.38874100  | -1.08424600 | 0.00028400  |
| N | 3.38874200  | 1.08423800  | -0.00031400 |
| C | -2.93993100 | 2.45735100  | 0.00060200  |
| H | -2.33000600 | 2.65257700  | 0.88267300  |
| H | -2.33086700 | 2.65336200  | -0.88188700 |
| H | -3.81352000 | 3.10393700  | 0.00130500  |
| C | -2.93988100 | -2.45735500 | -0.00055400 |
| H | -2.33009400 | -2.65264300 | -0.88270300 |
| H | -2.33068000 | -2.65328000 | 0.88185900  |
| H | -3.81346400 | -3.10395000 | -0.00107000 |
| C | 2.93993000  | -2.45737200 | 0.00047800  |
| H | 2.33073100  | -2.65298200 | 0.88295300  |
| H | 2.33016800  | -2.65302300 | -0.88161500 |
| H | 3.81353900  | -3.10392800 | 0.00017200  |
| C | 2.93992800  | 2.45736300  | -0.00071000 |
| H | 2.32961800  | 2.65238600  | -0.88255200 |
| H | 2.33125500  | 2.65358300  | 0.88200700  |
| H | 3.81353100  | 3.10392400  | -0.00192800 |
| C | -1.16203300 | 0.00001900  | 0.00011000  |
| C | 1.16202100  | 0.00000700  | -0.00013800 |
| P | 0.00001200  | 1.35347900  | 0.00007600  |
| P | -0.00002700 | -1.35345100 | -0.00002000 |

**Compound XXII' (Singlet)**

**Absolute Energy = -727.965932 a.u.**

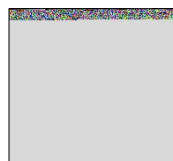

|     |             |             |             |
|-----|-------------|-------------|-------------|
| 1 1 |             |             |             |
| C   | -0.97134300 | 1.23362500  | 0.00035000  |
| C   | 0.39203300  | 0.70553600  | 0.00026200  |
| C   | 0.39311700  | -0.70516200 | 0.00020300  |
| C   | -0.96858300 | -1.23511000 | 0.00030800  |
| C   | -1.24579200 | -2.68001000 | 0.00005600  |
| C   | -1.24960200 | 2.67847200  | 0.00003000  |
| P   | -2.22164200 | -0.00110300 | -0.00005400 |
| C   | 1.56969800  | -1.40469500 | 0.00004900  |
| C   | 1.56739500  | 1.40653300  | 0.00001100  |
| C   | 2.79294700  | -0.68251400 | -0.00011300 |
| C   | 2.79179600  | 0.68582000  | -0.00011700 |

|   |             |             |             |
|---|-------------|-------------|-------------|
| H | 3.72779400  | -1.22478000 | -0.00051400 |
| H | 3.72585600  | 1.22948000  | 0.00002200  |
| H | 1.58415200  | -2.48705200 | 0.00053000  |
| H | 1.58050700  | 2.48889800  | -0.00030700 |
| H | -0.78300300 | 3.13965900  | -0.87763600 |
| H | -2.31133100 | 2.90560600  | 0.00486400  |
| H | -0.77345300 | 3.14293300  | 0.87060600  |
| H | -0.77172300 | -3.14438900 | 0.87168500  |
| H | -2.30740700 | -2.90795100 | 0.00190000  |
| H | -0.77675100 | -3.14082700 | -0.87657200 |

### Compound XXII'' (Singlet)

Absolute Energy = -1257.770409 a.u.

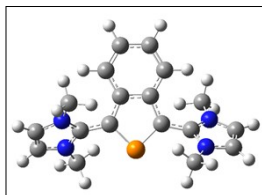

|     |             |             |             |
|-----|-------------|-------------|-------------|
| 1 1 |             |             |             |
| C   | -1.23631100 | 0.20692200  | 0.07840900  |
| C   | -0.70857400 | -1.12029900 | 0.05040100  |
| C   | 0.70857400  | -1.12030600 | -0.05046900 |
| C   | 1.23630700  | 0.20692800  | -0.07838000 |
| C   | 2.64481400  | 0.49928000  | -0.07740100 |
| C   | 4.80006000  | 0.53792000  | 0.48201600  |
| C   | 4.63801500  | 1.35387500  | -0.58071700 |
| H   | 5.67732200  | 0.28560500  | 1.04910900  |
| H   | 5.34708400  | 1.94884100  | -1.12640000 |
| N   | 3.30494000  | 1.31620300  | -0.92063600 |
| N   | 3.56199300  | 0.02149100  | 0.78860700  |
| C   | 2.71732200  | 2.03366100  | -2.04413900 |
| H   | 1.89368800  | 1.44737300  | -2.44129600 |
| H   | 2.34673500  | 3.00471000  | -1.72391300 |
| H   | 3.48252100  | 2.16309200  | -2.80424600 |
| C   | 3.28019600  | -0.80909100 | 1.95194900  |
| H   | 3.51597400  | -1.85057700 | 1.74670300  |
| H   | 3.88056300  | -0.45061300 | 2.78372200  |
| H   | 2.22442900  | -0.72249700 | 2.19092100  |
| C   | -2.64481600 | 0.49926000  | 0.07741200  |
| C   | -4.63804600 | 1.35379300  | 0.58071300  |
| C   | -4.80002600 | 0.53797800  | -0.48213800 |
| H   | -5.34714700 | 1.94870000  | 1.12642100  |
| H   | -5.67725000 | 0.28574900  | -1.04932800 |
| N   | -3.56194700 | 0.02156100  | -0.78869800 |
| N   | -3.30498900 | 1.31608400  | 0.92070300  |
| C   | -3.28006100 | -0.80891600 | -1.95209100 |

|   |             |             |             |
|---|-------------|-------------|-------------|
| H | -2.22433600 | -0.72205300 | -2.19116400 |
| H | -3.51555700 | -1.85047000 | -1.74687100 |
| H | -3.88059600 | -0.45055000 | -2.78379000 |
| C | -2.71744000 | 2.03337900  | 2.04434500  |
| H | -2.34687000 | 3.00449100  | 1.72429000  |
| H | -3.48266800 | 2.16266300  | 2.80444600  |
| H | -1.89380100 | 1.44705500  | 2.44143900  |
| P | 0.00000100  | 1.42373000  | 0.00010500  |
| C | 1.39591100  | -2.34707500 | -0.14502100 |
| C | -1.39592600 | -2.34707600 | 0.14495200  |
| C | 0.69946300  | -3.52829400 | -0.08269700 |
| C | -0.69947600 | -3.52829500 | 0.08262700  |
| H | 1.22577200  | -4.46971900 | -0.15872000 |
| H | -1.22576800 | -4.46972700 | 0.15869700  |
| H | 2.46996000  | -2.35864800 | -0.28789100 |
| H | -2.46997400 | -2.35862200 | 0.28782500  |

### Compound XXIII' (Singlet)

Absolute Energy = -4627.645192 a.u.

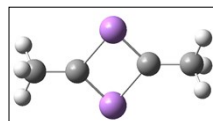

|     |             |             |             |
|-----|-------------|-------------|-------------|
| 0 1 |             |             |             |
| C   | 1.16941400  | 0.39673100  | 0.00003100  |
| C   | -1.16895200 | -0.39686700 | -0.00003900 |
| C   | 2.50795900  | 1.02586900  | -0.00046000 |
| H   | 2.62613100  | 1.67279400  | -0.87559100 |
| H   | 2.62664800  | 1.67329000  | 0.87423200  |
| H   | 3.31448400  | 0.29128100  | -0.00051400 |
| C   | -2.50752100 | -1.02607400 | -0.00045400 |
| H   | -2.62571000 | -1.67309000 | -0.87550200 |
| H   | -2.62616100 | -1.67340200 | 0.87432000  |
| H   | -3.31406600 | -0.29151400 | -0.00051700 |
| As  | 0.64422100  | -1.31562200 | 0.00013800  |
| As  | -0.64442500 | 1.31570300  | 0.00013800  |

### Compound XXIII'' (Singlet)

Absolute Energy = -5157.365195 a.u.

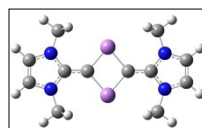

|     |            |            |            |
|-----|------------|------------|------------|
| 0 1 |            |            |            |
| C   | 4.78187600 | 0.67263200 | 0.00001900 |



|    |             |             |             |
|----|-------------|-------------|-------------|
| C  | 4.78189500  | -0.67255500 | 0.00048000  |
| C  | 2.62647800  | 0.00001200  | -0.00004300 |
| H  | 5.59463700  | 1.37504300  | -0.00011300 |
| H  | 5.59466300  | -1.37495600 | 0.00087000  |
| C  | -2.62648800 | -0.00000800 | -0.00004200 |
| C  | -4.78188300 | -0.67264800 | -0.00010700 |
| C  | -4.78190700 | 0.67254400  | 0.00036500  |
| H  | -5.59465100 | -1.37505100 | -0.00041600 |
| H  | -5.59470200 | 1.37491500  | 0.00059400  |
| N  | -3.46585200 | -1.08481900 | -0.00036500 |
| N  | -3.46589100 | 1.08477200  | 0.00031700  |
| N  | 3.46586600  | -1.08477100 | 0.00048600  |
| N  | 3.46584700  | 1.08481900  | -0.00029500 |
| C  | -3.02583600 | 2.45897600  | 0.00108200  |
| H  | -2.41955300 | 2.66071700  | 0.88481400  |
| H  | -2.42035600 | 2.66203900  | -0.88289400 |
| H  | -3.90303000 | 3.10063100  | 0.00195400  |
| C  | -3.02567700 | -2.45898200 | -0.00062000 |
| H  | -2.41955300 | -2.66106700 | -0.88438000 |
| H  | -2.41996300 | -2.66156200 | 0.88331800  |
| H  | -3.90280500 | -3.10072400 | -0.00101900 |
| C  | 3.02578300  | -2.45895700 | 0.00086200  |
| H  | 2.41949200  | -2.66096600 | 0.88453100  |
| H  | 2.42029300  | -2.66173600 | -0.88317400 |
| H  | 3.90295300  | -3.10064700 | 0.00157500  |
| C  | 3.02571000  | 2.45898700  | -0.00083200 |
| H  | 2.41937300  | 2.66082300  | -0.88451000 |
| H  | 2.42024600  | 2.66188000  | 0.88319500  |
| H  | 3.90285300  | 3.10071400  | -0.00168600 |
| C  | -1.23579600 | -0.00002400 | 0.00003400  |
| C  | 1.23578500  | 0.00001500  | -0.00029400 |
| As | -0.00002900 | 1.46088500  | -0.00013100 |
| As | 0.00004900  | -1.46088500 | -0.00014400 |

#### Coordinates of 4g

37

symmetry c2v

E = -967.920579539

|   |              |             |              |
|---|--------------|-------------|--------------|
| C | -1.061815000 | 0.000000000 | 1.153402000  |
| C | -0.689213000 | 0.000000000 | 2.517055000  |
| C | 0.689213000  | 0.000000000 | 2.517055000  |
| C | 1.061815000  | 0.000000000 | 1.153402000  |
| N | 0.000000000  | 0.000000000 | 0.326885000  |
| H | -1.334943000 | 0.000000000 | 3.380411000  |
| H | 1.334943000  | 0.000000000 | 3.380411000  |
| C | -2.370095000 | 0.000000000 | 0.589541000  |
| C | -4.592022000 | 0.000000000 | 0.319555000  |
| C | -3.998773000 | 0.000000000 | -0.943790000 |
| N | -2.626968000 | 0.000000000 | -0.722746000 |
| N | -3.544389000 | 0.000000000 | 1.236581000  |
| C | 2.370095000  | 0.000000000 | 0.589541000  |
| C | 3.998773000  | 0.000000000 | -0.943790000 |
| C | 4.592022000  | 0.000000000 | 0.319555000  |
| N | 3.544389000  | 0.000000000 | 1.236581000  |

|   |              |             |              |
|---|--------------|-------------|--------------|
| N | 2.626968000  | 0.000000000 | -0.722746000 |
| C | 5.968190000  | 0.000000000 | 0.480557000  |
| C | 4.758070000  | 0.000000000 | -2.103276000 |
| C | 6.132882000  | 0.000000000 | -1.944331000 |
| C | 6.726668000  | 0.000000000 | -0.677057000 |
| H | 6.427383000  | 0.000000000 | 1.458705000  |
| H | 7.804414000  | 0.000000000 | -0.600338000 |
| H | 6.764239000  | 0.000000000 | -2.821191000 |
| H | 4.301063000  | 0.000000000 | -3.082311000 |
| C | -4.758070000 | 0.000000000 | -2.103276000 |
| C | -5.968190000 | 0.000000000 | 0.480557000  |
| C | -6.726668000 | 0.000000000 | -0.677057000 |
| C | -6.132882000 | 0.000000000 | -1.944331000 |
| H | -4.301063000 | 0.000000000 | -3.082311000 |
| H | -6.764239000 | 0.000000000 | -2.821191000 |
| H | -7.804414000 | 0.000000000 | -0.600338000 |
| H | -6.427383000 | 0.000000000 | 1.458705000  |
| H | 3.630920000  | 0.000000000 | 2.239539000  |
| H | 1.881193000  | 0.000000000 | -1.401770000 |
| H | -1.881193000 | 0.000000000 | -1.401770000 |
| H | -3.630920000 | 0.000000000 | 2.239539000  |

#### References:

1. G. K. Pierens, *J. Comput. Chem.*, 2014, **35**, 1388-1394.
2. M. Begtrup, *J. Chem. Soc., Chem. Commun.*, 1975, DOI: 10.1039/C39750000334, 334-335.
3. M. C. Cann, *J. Org. Chem.*, 1988, **53**, 1112-1113.
4. G. Boche, P. Andrews, K. Harms, M. Marsch, K. S. Rangappa, M. Schimeczek and C. Willeke, *J. Am. Chem. Soc.*, 1996, **118**, 4925-4930.
5. T. Soos, G. Hajós and A. Messmer, *J. Org. Chem.*, 1997, **62**, 1136-1138.
6. S. McIlroy, C. J. Cramer and D. E. Falvey, *Org. Lett.*, 2000, **2**, 2451-2454.
7. K. Satake, Y. Kubota, C. E. Cordonier, H. Okamoto and M. Kimura, *Angew. Chem. Int. Ed.*, 2004, **43**, 736-738.
8. A. H. Winter, H. H. Gibson and D. E. Falvey, *J. Org. Chem.*, 2007, **72**, 8186-8195.
9. J. L. Crandon and D. P. Nicolau, *Antimicrob. Agents Chemother.*, 2015, **59**, 2688-2694.
10. A. Pogoreltsev, Y. Tulchinsky, N. Fridman and M. Gandelman, *J. Am. Chem. Soc.*, 2017, **139**, 4062-4067.
11. J. Zhou, L. L. Liu, L. L. Cao and D. W. Stephan, *Chem. Commun.*, 2018, **54**, 4390-4393.
12. J. Zhou, L. L. Liu, L. L. Cao and D. W. Stephan, *Angew. Chem. Int. Ed.*, 2018, **57**, 3322-3326.
13. G. M. Peters, J. B. Winegrad, M. R. Gau, G. H. Imler, B. Xu, S. Ren, B. B. Wayland and M. J. Zdilla, *Inorg. Chem.*, 2017, **56**, 3377-3385.
14. D. Xue and Y.-Q. Long, *J. Org. Chem.*, 2014, **79**, 4727-4734.
15. M. L. P. R. Alapati, S. R. Abburi, S. B. Mukkamala and R. M. Krishnaji, *Syn. Commun.*, 2015, **45**, 2436-2443.
16. O. V. Dolomanov, L. J. Bourhis, R. J. Gildea, J. A. Howard and H. Puschmann, *J. Appl. Crystallogr.*, 2009, **42**, 339-341.
17. M. C. Burla, R. Caliandro, M. Camalli, B. Carrozzini, G. L. Cascarano, L. De Caro, C. Giacovazzo, G. Polidori, D. Siliqi and R. Spagna, *J. Appl. Crystallogr.*, 2007, **40**, 609-613.
18. G. M. Sheldrick, *Acta Crystallogr. C*, 2015, **71**, 3-8.

19. M. J. Frisch, G. W. Trucks, H. B. Schlegel, G. E. Scuseria, M. A. Robb, J. R. Cheeseman, G. Scalmani, V. Barone, G. A. Petersson, H. Nakatsuji, X. Li, M. Caricato, A. V. Marenich, J. Bloino, B. G. Janesko, R. Gomperts, B. Mennucci, H. P. Hratchian, J. V. Ortiz, A. F. Izmaylov, J. L. Sonnenberg, Williams, F. Ding, F. Lipparini, F. Egidi, J. Goings, B. Peng, A. Petrone, T. Henderson, D. Ranasinghe, V. G. Zakrzewski, J. Gao, N. Rega, G. Zheng, W. Liang, M. Hada, M. Ehara, K. Toyota, R. Fukuda, J. Hasegawa, M. Ishida, T. Nakajima, Y. Honda, O. Kitao, H. Nakai, T. Vreven, K. Throssell, J. A. Montgomery Jr., J. E. Peralta, F. Ogliaro, M. J. Bearpark, J. J. Heyd, E. N. Brothers, K. N. Kudin, V. N. Staroverov, T. A. Keith, R. Kobayashi, J. Normand, K. Raghavachari, A. P. Rendell, J. C. Burant, S. S. Iyengar, J. Tomasi, M. Cossi, J. M. Millam, M. Klene, C. Adamo, R. Cammi, J. W. Ochterski, R. L. Martin, K. Morokuma, O. Farkas, J. B. Foresman and D. J. Fox, *Journal*, 2016, Gaussian, Inc.: Wallingford, CT.
20. T. Ziegler and A. Rauk, *Inorg. Chem.*, 1979, **18**, 1755-1759.
21. K. Morokuma, *J. Chem. Phys.*, 1971, **55**, 1236-1244.
22. M. Mousavi and G. Frenking, *Organometallics*, 2013, **32**, 1743-1751.
23. M. v. Hopffgarten and G. Frenking, *WIREs Comput. Mol. Sci.*, 2012, **2**, 43-62.
24. T. A. N. Nguyen and G. Frenking, *Chem. Eur. J.*, 2012, **18**, 12733-12748.
25. K. Kitaura and K. Morokuma, *Int. J. Quantum Chem.*, 1976, **10**, 325-340.
26. T. Ziegler and A. Rauk, *Theor. Chim. Acta* 1977, **46**, 1-10.
27. M. P. Mitoraj, A. Michalak and T. Ziegler, *J. Chem. Theory Comput.*, 2009, **5**, 962-975.
28. M. Mitoraj and A. Michalak, *J. Mol. Model.*, 2008, **14**, 681-687.
29. A. Michalak, M. Mitoraj and T. Ziegler, *J. Phys. Chem. A*, 2008, **112**, 1933-1939.
30. M. Mitoraj and A. Michalak, *Organometallics*, 2007, **26**, 6576-6580.
31. M. Mitoraj and A. Michalak, *J. Mol. Model.*, 2007, **13**, 347-355.
32. ADF2020.102, SCM, Theoretical Chemistry, Vrije Universiteit, Amsterdam, The Netherlands, see <http://www.scm.com>, (accessed October 5, 2024).
33. G. te Velde, F. M. Bickelhaupt, E. J. Baerends, C. Fonseca Guerra, S. J. A. van Gisbergen, J. G. Snijders and T. Ziegler, *J. Comput. Chem.*, 2001, **22**, 931-967.
